1 Reinforcement Learning and Bayesian Inference Provide  
2 Complementary Models for the Unique Advantage of  
3 Adolescents in Stochastic Reversal

4 Maria K. Eckstein<sup>1</sup>, Sarah L. Master<sup>1</sup>, Ronald E. Dahl<sup>2</sup>, Linda  
5 Wilbrecht<sup>1,3</sup>, and Anne G.E. Collins<sup>1</sup>

6 <sup>1</sup>Department of Psychology, 2121 Berkeley Way West

7 <sup>2</sup>Institute of Human Development, 2121 Berkeley Way West

8 <sup>3</sup>Helen Wills Neuroscience Institute, 175 Li Ka Shing Center  
9 Berkeley, California 94720 USA  
10

---

---

11 **Abstract**

12 During adolescence, youth venture out, explore the wider world,  
13 and are challenged to learn how to navigate novel and uncertain  
14 environments. We investigated whether adolescents are uniquely  
15 adapted to this transition, compared to younger children and adults.  
16 In a stochastic, volatile reversal-learning task with a sample of 291  
17 participants aged 8-30, we found that adolescents outperformed  
18 both younger and older participants. We developed two indepen-  
19 dent cognitive models, based on Reinforcement learning (RL) and  
20 Bayesian inference (BI). The RL parameter for learning from nega-  
21 tive outcomes and the BI parameters specifying participants' men-  
22 tal models peaked closest to optimal in adolescents, suggesting a  
23 central role in adolescent cognitive processing. By contrast, persis-  
24 tence and noise parameters improved monotonously with age. We  
25 distilled the insights of RL and BI using principal component anal-  
26 ysis and found that three shared components interacted to form the  
27 adolescent performance peak: adult-like behavioral quality, child-  
28 like time scales, and developmentally-unique processing of positive  
29 feedback. This research highlights adolescence as a neurodevelop-  
30 mental window that may be specifically adapted for volatile and

31 **uncertain environments. It also shows how detailed insights can be**  
32 **gleaned by using cognitive models in new ways.**

33 **Keywords:** Reinforcement learning, Bayesian inference, computa-  
34 tional modeling, development, volatility, adolescence, non-linear changes

## 35 1. Introduction

36 In mammals and other species with parental care, there is typically an  
37 adolescent stage of development in which the young are no longer supported  
38 by parental care, but are not yet adult (Natterson-Horowitz and Bowers,  
39 2019). This adolescent period is increasingly viewed as a critical epoch in  
40 which organisms explore the world, make pivotal decisions with short- and  
41 long-term impact on survival (Frankenhuis and Walasek, 2020), and learn  
42 about important features of their environment (DePasque and Galván, 2017;  
43 Steinberg, 2005), likely taking advantage of a second window of brain plastic-  
44 ity (Larsen and Luna, 2018; Lourenco and Casey, 2013; Piekarski, Johnson,  
45 et al., 2017).

46 In humans, adolescence often involves an expansion of environmental con-  
47 texts and increasingly frequent transitions between them (*contextual volatil-*  
48 *ity*; e.g., new pastime activities, growing relevance of peer relationships; Al-  
49 bert et al., 2013; Somerville et al., 2017), as well as increased exposure to  
50 uncertainty (*outcome stochasticity*; e.g., increased risk-taking and sensation  
51 seeking, increased unpredictability of social interactions; Romer and Hen-  
52 nesy, 2007; van den Bos and Hertwig, 2017). Accordingly, it has been ar-  
53 gued that adolescent brains and minds are specifically adapted to contextual

54 volatility and outcome stochasticity, showing an increased ability to learn  
55 from and succeed in these situations (Dahl et al., 2018; Davidow et al., 2016;  
56 Johnson and Wilbrecht, 2011; Lloyd et al., 2020; Lourenco and Casey, 2013;  
57 Sercombe, 2014).

58 The goal of this study was to test this *U-shape* hypothesis in a controlled  
59 laboratory environment. We employed a stochastic reversal-learning task in  
60 a large developmental sample ( $n = 291$ ) with a wide, continuous age range  
61 (8-30 years), offering enough statistical power to observe non-linear effects  
62 of age (such as the predicted U-shaped pattern with peak in adolescence).  
63 Another goal was to identify a computational explanation of the non-linear  
64 development of underlying cognitive processes, using state-of-the-art compu-  
65 tational modeling.

### 66 1.1. *U-Shapes in Development*

67 The predicted U-shaped development is in line with recent findings: Ado-  
68 lescents show non-linear developments both in terms of neural maturation  
69 and with regard to behaviour, including emotional processing, learning, and  
70 decision making (for reviews, see Dahl et al., 2018; Giedd et al., 1999;  
71 Somerville and Casey, 2010; Sowell et al., 2003; Toga et al., 2006). Research  
72 on adolescent development has often focused on aspects with negative real-  
73 life outcomes, including elevated risk-taking and sensation seeking (Braams  
74 et al., 2015; Galvan et al., 2006; Harden and Tucker-Drob, 2011; Romer and  
75 Hennessy, 2007), but positive aspects have become evident more recently,

76 too (DePasque and Galván, 2017; Sercombe, 2014). For example, adoles-  
77 cents have outperformed adults in certain measures of creativity (Kleibeuker  
78 et al., 2013) and showed enhanced social learning (Brandner et al., 2021;  
79 Gopnik et al., 2017) and exploration (Somerville et al., 2017). With par-  
80 ticular interest to our hypothesis, adolescents have outperformed adults on  
81 stochastic learning tasks (Cauffman et al., 2010; Davidow et al., 2016) and  
82 some aspects of a reversal-learning task (van der Schaaf et al., 2011; Fig. 3).

83 Adolescents' behavioral advantages on these tasks are likely related to  
84 non-linear patterns of brain development (Dahl et al., 2018; Giedd et al.,  
85 1999; Somerville and Casey, 2010; Sowell et al., 2003; Toga et al., 2006), and  
86 potentially modulated by puberty-related hormonal changes (Blakemore et  
87 al., 2010; Braams et al., 2015; Gracia-Tabuenca et al., 2021; Laube, Lorenz,  
88 et al., 2020; Op de Macks et al., 2016; Piekarski, Johnson, et al., 2017),  
89 some of which have been associated with cognitive flexibility, decision mak-  
90 ing under uncertainty, and feedback processing, cognitive processes that are  
91 particularly relevant for stochastic reversal learning. Supporting this per-  
92 spective, similar prowess in flexibility has been reported in developing ro-  
93 dents (Guskjolen et al., 2017; Johnson and Wilbrecht, 2011; Simon et al.,  
94 2013), and linked to neural and hormonal maturation (Delevich et al., 2019;  
95 Piekarski, Boivin, et al., 2017).

96 *1.2. Stochastic Reversal Learning*

97 Studied since the birth of the cognitive neurosciences, reversal learning  
98 has recently seen an exponential growth in published studies. Originally  
99 meant to measure response inhibition, reversal paradigms are now agreed to  
100 primarily measure cognitive flexibility (Izquierdo et al., 2017). In stochas-  
101 tic reversal-learning tasks, participants need to discriminate which outcomes  
102 occur due to inherent stochasticity, in which case they should double down  
103 on their current, appropriate strategy; and which outcomes are caused by  
104 context switches, in which case they need to rapidly change their strategy.  
105 Stochastic reversal tasks therefore pose a fundamental tension between per-  
106 sistence with previous strategies and adaptability to new circumstances, a  
107 major challenge in the adolescent transition.

108 An abundance of studies has mapped the specific brain areas (most no-  
109 tably orbitofrontal cortex and striatum) and endocrine systems (mainly sero-  
110 tonin, dopamine, and glutamate) relevant for reversal learning (Clark et al.,  
111 2004; Frank and Claus, 2006; Hamilton and Brigman, 2015; Izquierdo et  
112 al., 2017; Izquierdo and Jentsch, 2012; Kehagia et al., 2010; Yapple and Yu,  
113 2019). Most of these systems still undergo developmental changes during  
114 adolescence and early adulthood, oftentimes following U-shaped trajectories  
115 (Albert et al., 2013; Casey et al., 2008; Dahl et al., 2018; DePasque and  
116 Galván, 2017; Larsen and Luna, 2018; Laube, Lorenz, et al., 2020; Lourenco  
117 and Casey, 2013; Piekarski, Johnson, et al., 2017; Somerville and Casey,  
118 2010; Toga et al., 2006). This suggests that behavioral development, as well,

119 might show a non-linear development.

120       However, even though reversal tasks have been used abundantly in de-  
121 velopmental populations (e.g., Adleman et al., 2011; DePasque and Galván,  
122 2017; Dickstein, Finger, Brotman, et al., 2010; Dickstein, Finger, Skup, et  
123 al., 2010; Finger et al., 2008; Harms et al., 2018; Hildebrandt et al., 2018;  
124 Minto de Sousa et al., 2015), we still know surprisingly little about their de-  
125 velopmental trajectory. To our knowledge, only three studies have assessed  
126 this: Two employed binary group designs comparing adolescents to adults,  
127 but did not show significant age differences in performance (Hauser et al.,  
128 2015; Javadi et al., 2014). Note that the U-shaped developments we predict  
129 would be undetectable in most binary group designs. A third study employed  
130 a deterministic reversal task, and tested four age groups across adolescence,  
131 which allowed to assess non-linear changes (van der Schaaf et al., 2011). In-  
132 deed, there was an adolescent peak in reversal performance (Fig. 3). Here,  
133 we seek to extend this finding by studying a larger sample, employing a  
134 stochastic task, and to provide insights into the cognitive mechanisms that  
135 support adolescents' superior performance, using computational modeling.

### 136 *1.3. Computational Modeling*

#### 137 *1.3.1. Reinforcement Learning (RL)*

138       RL is a popular framework to model probabilistic reversal learning (Boehme  
139 et al., 2017; Chase et al., 2010; Gläscher et al., 2009; Hauser et al., 2015;  
140 Javadi et al., 2014; Metha et al., 2020; Peterson et al., 2009). RL agents

141 choose actions based on action *values* that reflect actions' expected long-term  
142 cumulative reward. Action values are typically estimated by incrementally  
143 updating them every time an action outcome is observed (see section 4.5.1).  
144 The size of each update, determined by an agent's *learning rate*, captures the  
145 integration time scale, i.e., whether value estimates are based on few recent  
146 outcomes, or many outcomes that reach further into the past. A specialized  
147 network of brain regions, including the striatum and frontal cortex, has been  
148 associated with specific RL-like computations (Frank and Claus, 2006; D.  
149 Lee et al., 2012; Niv, 2009; O'Doherty et al., 2015).

150 As a computational model, RL interprets cognitive processing during re-  
151 versal learning as *value learning*: RL agents continuously adjust current  
152 action values based on new outcomes, striving to learn increasingly accu-  
153 rate values (Fig. 3A, left). Importantly, the same gradual learning process  
154 occurs during stable task periods and after context switches, without an ex-  
155 plicit concept of switching. Behavioral switching occurs when the previously-  
156 rewarding action has accumulated enough negative outcomes to push its  
157 value below the previously-unrewarding action, in stark contrast to the quick  
158 and flexible switching behavior observed in humans and non-human animals  
159 (Costa et al., 2015; Izquierdo et al., 2017).

160 Because basic RL algorithms hence behave sub-optimally in volatile envi-  
161 ronments (Gershman and Uchida, 2019; Sutton and Barto, 2017), we imple-  
162 mented model augmentations that alleviate these issues, including distinct  
163 learning rates for positive and negative outcomes (e.g., Cazé and van der

164 Meer, 2013; Christakou et al., 2013; Dabney et al., 2020; Frank et al., 2004;  
165 Harada, 2020; Javadi et al., 2014; Lefebvre et al., 2017; Palminteri et al.,  
166 2016; van den Bos et al., 2012), counter-factual updating (e.g., Boehme et  
167 al., 2017; Boorman et al., 2011; Gläscher et al., 2009; Hauser et al., 2014;  
168 Palminteri et al., 2016), and choice persistence (e.g., Sugawara and Katahira,  
169 2021). See section 4.5.1 for details.

### 170 1.3.2. *Bayesian Inference (BI)*

171 Many have also argued that a different computational framework, BI  
172 (specifically, Hidden Markov Models), provides a better model for human and  
173 animal behavior in reversal tasks (Bromberg-Martin et al., 2010; Costa et al.,  
174 2015; Fuhs and Touretzky, 2007; Gershman and Uchida, 2019; Solway and  
175 Botvinick, 2012). Indeed, BI models have shown better fit than RL models in  
176 three empirical studies on human adults (Hauser et al., 2014; Schlagenhaut  
177 et al., 2014) and macaques (Bartolo and Averbeck, 2020). Furthermore, BI  
178 is the standard modeling framework in the “inductive reasoning” literature,  
179 whose tasks are sometimes identical to stochastic reversal-learning tasks (e.g.,  
180 Nassar et al., 2012; O’Reilly et al., 2013; Yu and Dayan, 2005).

181 The main reason for the supposed superiority of BI in reversal learning is  
182 the ability to reason about *hidden states* and switch behavior rapidly after  
183 recognizing state changes. Hidden states are unobservable features that de-  
184 termine an environment’s underlying mechanics (e.g., in reversal tasks, which  
185 choices are objectively correct and incorrect). These states can be difficult



186 to infer when they lead to observable outcomes probabilistically. BI agents  
187 infer hidden states by engaging *predictive models* that determine how likely  
188 different outcomes occur in each state (e.g., how likely a negative outcome  
189 occurs after a correct versus incorrect choice). Agents continuously com-  
190 bine state *likelihoods* with their *prior beliefs* about hidden states to obtain  
191 updated *posterior beliefs* (Perfors et al., 2011; Sarkka, 2013).

192 Even though the BI framework supposedly provides an excellent choice  
193 to model stochastic reversal learning, it is still used rarely, and—to our  
194 knowledge—never in a developing population. Hence, BI could provide in-  
195 sights into the development of reversal learning that have so far escaped our  
196 attention, for example characterizing predictive mental models and inferen-  
197 tial reasoning.

198 The goal of this study was to characterize adolescent behavior in stochas-  
199 tic reversal, and to identify its underlying cognitive mechanisms, using com-  
200 putational modeling: Whereas RL can tell us about participants' learning  
201 rates in different situations and is in line with previous developmental mod-  
202 eling work (Hauser et al., 2015; Javadi et al., 2014), the majority of non-  
203 developmental work on reversal learning, and most standard cognitive neu-  
204 roscience tasks, BI can assess participants' mental task models and inferential  
205 processes, and is increasingly seen as a superior model compared to RL for  
206 reversal paradigms. Using in-depth modeling analyses, we found that the  
207 insights of both models could be combined to identify features of cognitive  
208 processing that went beyond any specific model, including time scales and

209 feedback processing. Our results support the existence of an adolescent per-  
210 formance peak in stochastic reversal learning, and show that it stems from  
211 the parallel development of multiple cognitive mechanisms.

## 212 **2. Results**

### 213 *2.1. Task Design*

214 Participants' goal in the experimental task was to collect gold coins, which  
215 were hidden in one of two locations (Fig. 1A). Which location contained the  
216 coin could change unpredictably (*volatility*), and the correct location did not  
217 always provide coins (*stochasticity*). On each trial, two identical boxes ap-  
218 peared on the screen. Participants chose one, either receiving a coin (reward)  
219 or not (Fig. 1A). The correct location was rewarded in 75% of the trials on  
220 which it was chosen, whereas the other one was never rewarded. Positive  
221 outcomes were therefore diagnostic of correct actions, whereas negative out-  
222 comes were ambiguous, arising from either stochastic noise or task switches.  
223 After reaching a non-deterministic performance criterion (see section 4.3), an  
224 unsignaled switch occurred, and the opposite location became rewarding (5-9  
225 switches; 120 trials (Fig. 1B). Before the main task, participants completed  
226 a child-friendly tutorial (section 4.3).

### 227 *2.2. Task Behavior*

228 Participants gradually adjusted their behavior after task switches, and  
229 on average started selecting the correct action about 2 trials after a switch,

230 reaching asymptotic performance of around 80% correct choices within 3-4  
231 trials after a switch (Fig. 1C). Participants almost always repeated their  
232 choice (“stayed”) after receiving positive outcomes (“- +” and “+ +”), and  
233 often switched actions after receiving two negative outcomes (“- -”). Behavior  
234 was most ambivalent after receiving a positive followed by a negative outcome  
235 (“+ -”), i.e., on “potential” switch trials (Fig. 1D; for age differences, see  
236 suppl. Fig. 15).

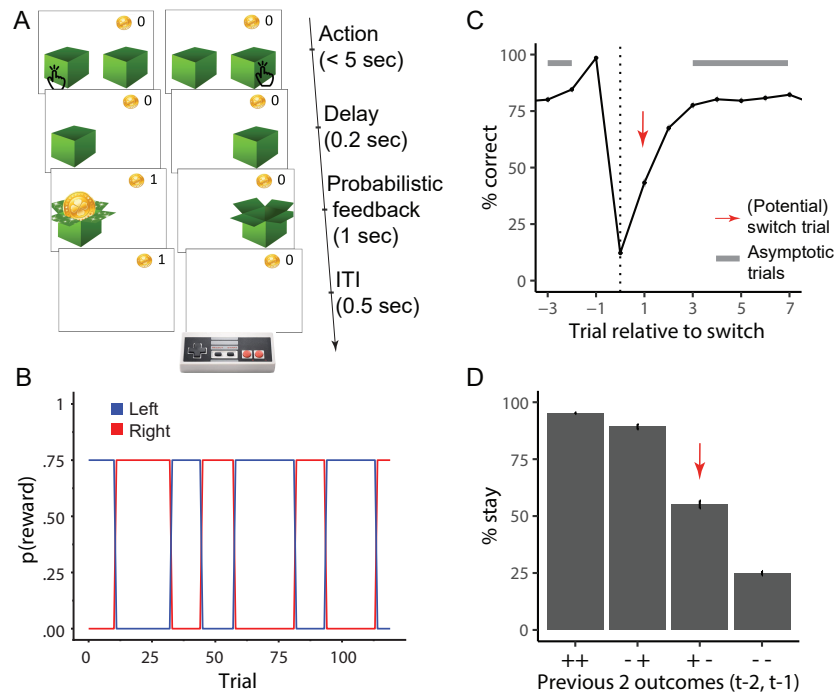

Figure 1: (A) Task design. On each trial, participants chose one of two boxes, using the two red buttons of the shown game controller. The chosen box either revealed a gold coin (left) or was empty (right). The probability of coin reward was 75% on the rewarded side, and 0% on the non-rewarded side. (B) The rewarded side changed multiple times, according to unpredictable task switches. (C) Average human performance and standard errors, aligned to true task switches (dotted line; trial 0). Switches only occurred after rewarded trials (section 4.3), resulting in performance of 100% on trial -1. The red arrow shows the switch trial, grey bars show trials included as asymptotic performance. (D) Average probability of repeating a previous choice (“stay”) as a function of the two previous outcomes ( $t-2$ ,  $t-1$ ) for this choice (“+”: reward; “-”: no reward). Error bars indicate between-participant standard errors. Red arrow highlights potential switch trials, i.e., when a rewarded trial is followed by a non-rewarded one, which—from participants’ perspective—is consistent with a task switch.

### 237 2.2.1. Age Differences: Performance Peak in Adolescents

238 Using (logistic) mixed-effects regression to test the continuous effects of  
 239 age on performance (for detailed methods, see section 4.4), we found positive  
 240 linear and negative quadratic age contrasts in all three performance mea-

241 sures (overall accuracy, stay after potential switch, accuracy on asymptotic  
242 trials; Table 1). This is in accordance with a general increase in perfor-  
243 mance from childhood to adulthood that is modified by an adolescent peak  
244 in performance.

245 To qualitatively assess the potential peak, without restricting the devel-  
246 opmental trajectory to a quadratic curve, we calculated rolling performance  
247 averages (for details, see section 4.4). Most performance measures revealed  
248 peaks at around 13-15 years, including overall accuracy (Fig. 2A), points  
249 won (suppl. Fig. 7A, E), and performance after switch trials (Fig. 2C)  
250 and during stable task periods (Fig. 2D). Overall accuracy inclined steeply  
251 between ages 8-14, after which it gradually declined, settling into a stable  
252 plateau around age 20 (Fig. 2A). The willingness to repeat previous actions  
253 after a single negative outcome (Fig. 2C) showed a similarly striking in-  
254 crease between children and adolescents, and a (less pronounced) decline for  
255 adults. This shows that in our task, adolescents were most persistent in the  
256 face of negative feedback. Performance during stable task periods (accuracy  
257 on asymptotic trials) also was highest in adolescents, especially compared to  
258 younger participants (Fig. 2D). Response times were the only performance  
259 measure in which adolescents were outperformed by adult participants (Fig.  
260 2B, 3D).

261 For easier visualization, we binned participants into discrete age groups,  
262 forming four equal-sized bins for participants aged 8-17, and two for adults  
263 (see section 6.2; suppl. Fig. 8A). In accordance with our hypothesis, the per-

264 formance peak occurred in the intermediate age range (third youth quartile),  
 265 such that adolescents between 13-15 years outperformed younger partici-  
 266 pants, older teenagers, and adults (Fig. 3C-F). Repeated, post-hoc, 5-wise  
 267 Bonferroni-corrected t-tests revealed several significant differences compar-  
 268 ing 13-to-15-year-olds to younger and older participants (Fig. 3C-F, suppl.  
 269 Table 8).

Table 1: Statistics of mixed-effects regression models predicting performance measures from sex (male, female), age (z-scored; “lin.”), and quadratic age (square of z-scored age; “qua.”; for details, see section 4.4). Overall accuracy, stay after potential (pot.) switch, and asymptotic performance were modeled using logistic regression, and z-scores are reported. Log-transformed response times on correct trials and total points won were modeled using linear regression, and t-values are reported. \*  $p < .05$ ; \*\*  $p < .01$ , \*\*\*  $p < .001$ . All models showed significant quadratic effects of age, supporting an inverse-U shaped developmental trajectory of performance.

| Performance measure (Figure)  | Predictor     | $\beta$ | z / t | p       | sig. |
|-------------------------------|---------------|---------|-------|---------|------|
| Overall accuracy (2A)         | Age (z, lin.) | 0.043   | 2.38  | 0.017   | **   |
|                               | Age (z, qua.) | -0.052  | -3.11 | 0.0019  | **   |
|                               | Sex           | 0.009   | 0.2   | 0.77    |      |
| Total points (7A)             | Age (z, lin.) | 0.003   | 0.01  | 0.99    |      |
|                               | Age (z, qua.) | -1.36   | -3.11 | 0.002   | **   |
|                               | Sex           | 0.19    | 0.23  | 0.82    |      |
| Response times (2B)           | Age (z, lin.) | -0.21   | -10.1 | < 0.001 | ***  |
|                               | Age (z, qua.) | 0.14    | 7.3   | < 0.001 | ***  |
|                               | Sex           | 0.19    | 5.0   | < 0.001 | ***  |
| Stay after (pot.) switch (2C) | Age (z, lin.) | 0.44    | 3.78  | < 0.001 | ***  |
|                               | Age (z, qua.) | -0.38   | -3.48 | < 0.001 | ***  |
|                               | Sex           | 0.26    | 1.24  | 0.21    |      |
| Asymptotic performance (2D)   | Age (z, lin.) | 0.17    | 3.57  | < 0.001 | ***  |
|                               | Age (z, qua.) | -0.18   | -3.97 | < 0.001 | ***  |
|                               | Sex           | 0.030   | 0.35  | 0.73    |      |

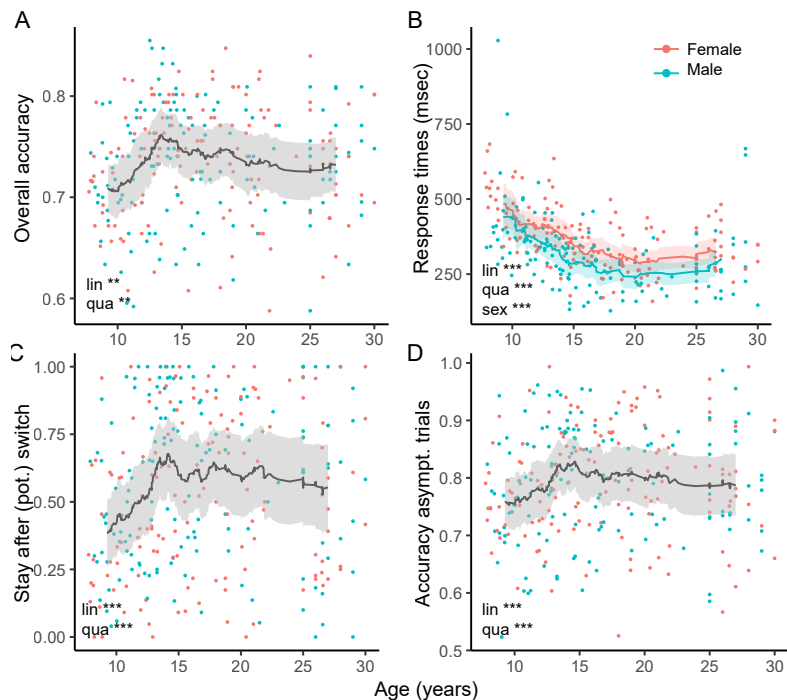

Figure 2: Task performance across age. Each dot shows one participant, color denotes sex. Lines show rolling averages, shades the standard error of the mean. The stars for “lin”, “qua”, and “sex” denote the significance of the effects of age, squared age, and sex on each performance measure, based on the regression models in Table 1 (\*  $p < .05$ , \*\*  $p < .01$ , \*\*\*  $p < .001$ ) (A) Percentage of correct choices across the entire task (120 trials), showing a peak in adolescents. The non-linear shape confirmed the significant quadratic effect of age (“qua”) on overall accuracy. (B) Median response times on correct trials. Regression coefficients differed significantly between males and females, and rolling averages are shown separately. Despite a significant quadratic effect of age, the peak for this performance measure occurred after adolescence. (C) Fraction of stay trials after (potential, “pot.”) switches (red arrows in Fig. 1C), showing an inverse U-shaped age trajectory and peak in adolescents. (D) Accuracy on asymptotic trials (grey bars in Fig. 1C), also showing an inverse U-shaped age trajectory and peak in adolescents.

270 We next focused on the differential effects of positive compared to negative  
271 outcomes on behavior, finding that adolescents adapted their choices more  
272 optimally to previous outcomes than younger or older participants. To show

273 this, we used mixed-effects logistic regression to predict actions on trial  $t$   
274 from predictors that encoded positive or negative outcomes on trials  $t - i$ ,  
275 for delays  $1 \leq i \leq 8$  (for details, see section 4.4). First, we observed that  
276 the effects of positive outcomes were several times larger than the effects of  
277 negative outcomes (suppl. Table 7; Fig. 7B-F). This patterns was expected  
278 given that positive outcomes were diagnostic, whereas negative outcomes  
279 were ambivalent.

280 The regression model also showed an interaction between age and previous  
281 outcomes, revealing that the effects of previous outcomes on future behavior  
282 changed with age (suppl. Fig. 7B, C, E, and F; suppl. Table 7). On  
283 trials  $t - 1$  and  $t - 2$ , positive outcomes interacted with age and squared  
284 age (all  $p$ 's  $< 0.014$ ; suppl. Table 7), confirming that the effect of positive  
285 outcomes increased with age and then slowly plateaued (suppl. Fig. 7C, F).  
286 For negative outcomes, the signs of the interaction was opposite for trials  
287  $t - 1$  versus  $t - 2$  (all  $p$ 's  $< 0.046$ ; suppl. Table 7), showing that the effect  
288 of negative outcomes flipped, being weakest in adolescents for trial  $t - 1$   
289 (Fig. 7F), but strongest for trial  $t - 2$ . In other words, adolescents were  
290 best at ignoring single, ambivalent negative outcomes ( $t - 1$ ), but most likely  
291 to integrate long-range negative outcomes ( $t - 2$ ), which potentially indicate  
292 task switches.

293 To summarize, adolescents of about 13-15 years outperformed younger  
294 participants, older adolescents, and adults on a stochastic reversal task. Per-  
295 formance advantages were evident in several measure of task performance,



296 and likely related to how participants responded to positive and negative  
297 outcomes. To understand better which cognitive processes underlie these  
298 patterns, we employed computational models featuring RL and BI.

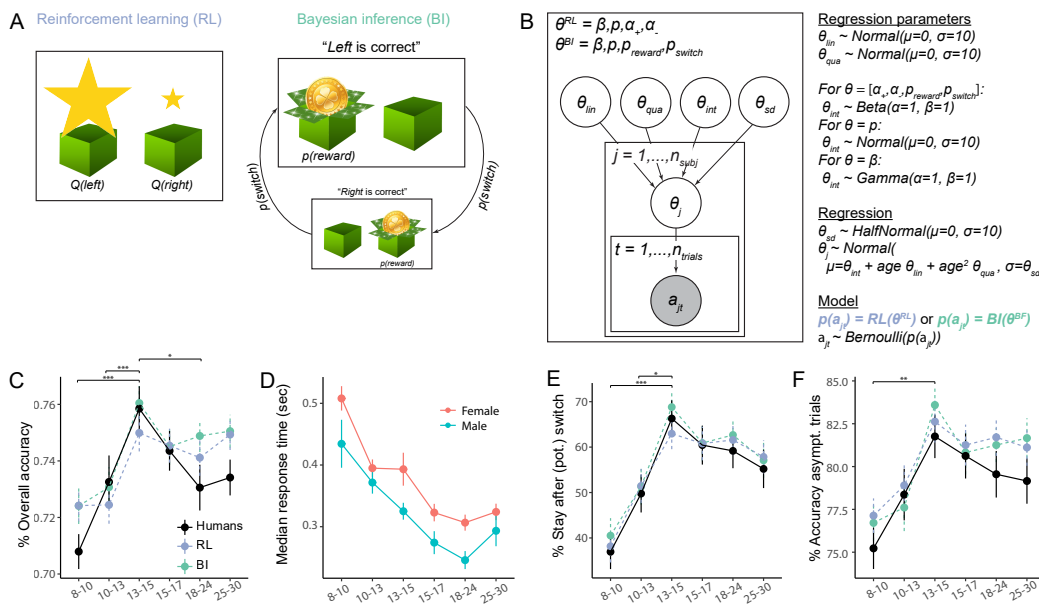

Figure 3: (A) Conceptual depiction of the RL and BI models. In RL (left), actions are selected based on learned values, illustrated by the size of stars ( $Q(left)$ ,  $Q(right)$ ). In BI (right), actions are selected based on a mental model of the task, which differentiates different hidden states (“Left is correct”, “Right is correct”), and specifies the transition probability between them ( $p(switch)$ ) as well as the task’s reward stochasticity ( $p(reward)$ ). The sizes of the two boxes illustrate the inferred probability of being in each state. (B) Hierarchical Bayesian model fitting. Left box: RL and BI models had free parameters  $\theta^{RL}$  and  $\theta^{BI}$ , respectively. Individual parameters  $\theta_j$  were based on group-level parameters  $\theta_{sd}$ ,  $\theta_{int}$ ,  $\theta_{lin}$ , and  $\theta_{qua}$  in a regression setting (see text on the right). For each model, all parameters were simultaneously fit to the observed (shaded) sequence of actions  $a_{jt}$  of all participants  $j$  and trials  $t$ , using MCMC sampling. Right: We chose uninformative priors for group-level parameters; the shape of each prior was based on the parameter’s allowed range. For each participant  $j$ , each parameter  $\theta$  was sampled according to a linear regression model, based on group-wide standard deviation  $\theta_{sd}$ , intercept  $\theta_{int}$ , linear change with age  $\theta_{lin}$ , and quadratic change with age  $\theta_{qua}$ . Each model (RL or BI) provided a choice likelihood  $p(a_{jt})$  for each participant  $j$  on each trial  $t$ , based on individual parameters  $\theta_j$ . Action selection followed a Bernoulli distribution (see 4.5.3 for details). (C)-(F) Human behavior for the measures shown in Fig. 2, binned in age quantiles. (C), (E), and (F) also show simulated model behavior for model validation, verifying that models closely reproduced human behavior and age differences.

299 *2.3. Cognitive Modeling*

300 We first identified a winning model of each family (RL, BI), comparing  
301 numerical fits (WAIC; Watanabe, 2013) between the most basic implemen-  
302 tation to versions with added augmentations (suppl. Fig. 17 and Fig. 16;  
303 Table 2).

304 The winning RL model had four free parameters: persistence  $p$ , inverse  
305 decision temperature  $\beta$ , and learning rates  $\alpha_+$  and  $\alpha_-$  for positive and neg-  
306 ative outcomes, respectively (section 4.5.1). In addition to “factual” action  
307 value updates on chosen actions, this model also performed “counterfactual”  
308 updates on the values of unchosen actions (Palminteri et al., 2016). For  
309 example, after receiving a reward for choosing left (factual outcome), the al-  
310 gorithm both decreases the value of the right choice (counterfactual update),  
311 and increases the value of the left choice (factual update). The size of counter-  
312 factual updates was controlled by learning rates  $\alpha_+$  and  $\alpha_-$ , simplifying the  
313 model (Table 2). Parameters  $p$  and  $\beta$  controlled the translation of RL values  
314 into choices: Increasing persistence  $p$  increased the probability of repeat-  
315 ing actions independently of action values. Small  $\beta$  induced decision noise  
316 (increasing exploratory choices), and large  $\beta$  allowed for reward-maximizing  
317 choices.

318 The winning BI model also had four parameters: besides choice-parameters  
319  $p$  and  $\beta$  as in the RL model, these were task volatility  $p_{switch}$  and reward  
320 stochasticity  $p_{reward}$ , which characterized participants’ internal task model  
321 (Fig. 3A; section 4.5.2).  $p_{switch}$  could represent a stable ( $p_{switch} = 0$ ) or

322 volatile task ( $p_{switch} > 0$ ), and  $p_{reward}$  deterministic ( $p_{reward} = 1$ ) or stochas-  
323 tic outcomes ( $p_{reward} < 1$ ). Because the actual task was based on parameters  
324  $p_{switch} = 0.05$  and  $p_{reward} = 0.75$ , an optimal agent would use these values,  
325 obtaining the most accurate inferences.

326 In addition to providing better model fit (Table 2), the two winning mod-  
327 els also validated better behaviorally compared to simpler versions, closely  
328 reproducing human behavior (Palminteri et al., 2017; Wilson and Collins,  
329 2019; Fig. 3C, E, F; suppl. Fig. 16 and Fig. 17). The winning RL model  
330 had the overall lowest WAIC score, revealing best quantitative fit, but both  
331 models validated equally well qualitatively: Both showed human-like behav-  
332 ior and reproduced all age differences, including adolescents' peak in overall  
333 accuracy (Fig. 3C), proportion of staying after (potential) switch trials (Fig.  
334 3E), asymptotic performance on non-switch trials (Fig. 3F), and their most  
335 efficient use of previous outcomes to adjust future actions (suppl. Fig. 7 D-  
336 F). Other models did not capture all these qualitative patterns (suppl. Fig.  
337 16, Fig. 17). The closeness in WAIC scores (Table 2) and the equal ability  
338 to reproduce details of human behavior reveal that both models captured  
339 human behavior adequately, and suggest that both provide plausible expla-  
340 nations of the underlying cognitive processes. We therefore fitted both to  
341 participant data to estimate individual parameter values, using hierarchical  
342 Bayesian fitting (Fig. 3B; section 4.5.3).

Table 2: WAIC model fits and standard errors for all models, based on hierarchical Bayesian fitting. Bold numbers highlight the winning model of each class. For the parameter-free BI model, the Akaike Information Criterion (AIC) was calculated precisely. WAIC differences are relative to next-best model of the same class, and include estimated standard errors of the difference as an indicator of meaningful difference. In the RL model, “ $\alpha$ ” refers to the classic RL formulation in which  $\alpha_+ = \alpha_-$ . “ $\alpha_c$ ” refers to the counterfactual learning rate that guides updates of unchosen actions, with  $\alpha_{+c} = \alpha_{-c}$  (see section 4.5.1).

|           | Free parameters (count)                                    | (W)AIC                           | WAIC Difference |
|-----------|------------------------------------------------------------|----------------------------------|-----------------|
| <b>BI</b> | –                                                          | (0) 31,959                       | 2,668 + – 0     |
|           | $\beta$                                                    | (1) 29,291 + – 206               | 868 + – 78      |
|           | $\beta, p$                                                 | (2) 28,423 + – 201               | 4,769 + – 132   |
|           | $\beta, p, p_{reward}$                                     | (3) 23,654 + – 203               | 51 + – 10       |
|           | $\beta, p, p_{reward}, p_{switch}$                         | (4) <b>23,603</b> + – <b>200</b> | 0               |
| <b>RL</b> | $\alpha, \beta$                                            | (2) 26,678 + – 200               | 438 + – 44      |
|           | $\alpha, \beta, \alpha_c$                                  | (3) 26,240 + – 201               | 1,429 + – 78    |
|           | $\alpha, \beta, \alpha_c, p$                               | (4) 24,811 + – 190               | 42 + – 13       |
|           | $\alpha_+, \beta, \alpha_{+c}, p, \alpha_-$                | (5) 24,769 + – 213               | 1,260 + – 73    |
|           | $\alpha_+, \beta, \alpha_{+c}, p, \alpha_-, \alpha_{-c}$   | (6) 23,509 + – 211               | 17 + – 10       |
|           | $\alpha_+ = \alpha_{+c}, \alpha_- = \alpha_{-c}, \beta, p$ | (4) <b>23,492</b> + – <b>201</b> | 0               |

### 343 2.3.1. Age Differences in Model Parameters

344 Across models, three parameters showed non-monotonic age trajectories,  
345 mirroring behavioral differences:  $\alpha_-$ ,  $p_{reward}$ , and  $p_{switch}$  declined drastically  
346 within the first three age bins (8-13 years), then reversed their trajectory and  
347 increased again, reaching slightly lower plateaus around 15 years that lasted  
348 through adulthood (Fig. 4C, G-H). For  $p_{switch}$ , age differences were captured  
349 in a significant quadratic effect of age in the age-based model (suppl. Table  
350 13; for detailed explanation, see section 4.5.3). For  $\alpha_-$  and  $p_{reward}$ , differences  
351 were captured in significant pairwise differences between 13-to-15-year-olds

352 and other age groups, tested within the age-less model (suppl. Table 12).

353 BI's mental model parameters  $p_{switch}$  and  $p_{reward}$  reflect task volatility  
354 and stochasticity (Fig. 1A), and can be compared to the true task param-  
355 eters ( $p_{reward} = 0.75$ ;  $p_{switch} = 0.05$ ) to assess how optimal participants'  
356 inferred models were. Both parameters were most optimal in 13-to-15-year-  
357 olds, whereas younger and older participants strikingly overestimated volatil-  
358 ity (larger  $p_{switch}$ ), while underestimating stochasticity (larger  $p_{reward}$ ). Sim-  
359 ilarly in RL,  $\alpha_-$  was lowest in 13-to-15-year-olds. Indeed, lower learning  
360 rates for negative feedback  $\alpha_-$  were beneficial because they avoided prema-  
361 ture switching based on single negative outcomes, while allowing adaptive  
362 switching after multiple negative outcomes.

363 In both RL and BI, choice parameters  $p$  and  $\beta$  increased monotonically  
364 with age, growing rapidly at first and plateauing around early adulthood  
365 (Fig. 4A, B, E, F). The age-based model (section 4.5.3) revealed that both  
366 the linear and negative quadratic effects of age were significant (suppl. Ta-  
367 ble 13). This shows that participants' willingness to repeat previous actions  
368 independently of outcomes ( $p$ ) and to exploit the best known option ( $\beta$ )  
369 steadily increased until adulthood, including steady growth during the teen  
370 years. Parameter  $\alpha_+$  showed a unique stepped age trajectory, featuring rel-  
371 atively stable values throughout childhood and adolescence, and an increase  
372 in adults (Fig. 4D).

373 Through the lens of RL, these findings suggest that adolescents outper-  
374 formed other age groups because they integrated negative feedback more

375 optimally ( $\alpha_-$ ). Through the lens of BI, the performance peak occurred  
376 because adolescents used a more accurate mental task model ( $p_{switch}$  and  
377  $p_{reward}$ ). Taken together, both models agree that behavioral differences arose  
378 from cognitive difference in the “update step” of feedback processing (i.e.,  
379 value updating in RL; state inference in BI). Age differences in the “choice  
380 step” (i.e., selecting actions), however, showed monotonous age differences  
381 with steady growth during adolescents, therefore likely contributing less to  
382 the peak.

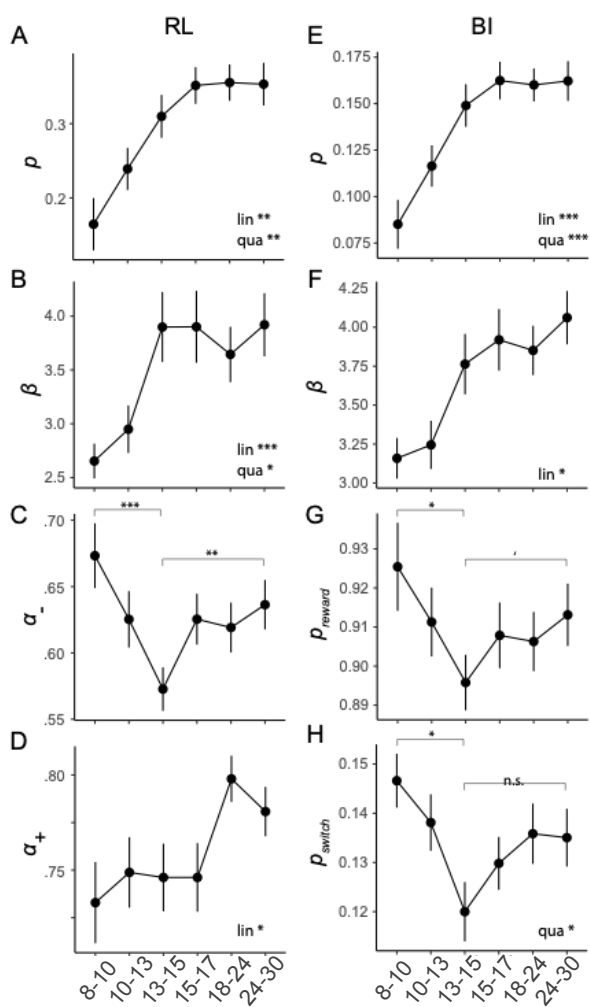

Figure 4: Fitted model parameters for the winning RL (left column) and BI model (right), plotted over age. Stars in combination with “lin” or “qua” indicate significant linear (“lin”) and quadratic (“qua”) effects of age on model parameters, based on the age-based fitting model. Stars on top of brackets show differences between groups, as revealed by t-tests conducted within the age-less fitting model (section 4.5.3; suppl. Tables 13 and 12). Dots (means) and error bars (standard errors) show the results of the age-less fitting model, providing an unbiased representation of individual fits. (A)-(D) RL model parameters. (E)-(H) BI model parameters.



383 *2.4. Integrating RL and BI—Going Beyond Specific Models*

384 These results raise an important question: Given that both RL and BI  
385 fit human behavior well, how do we reconcile differences in their compu-  
386 tational mechanisms? To address this, we first determined whether both  
387 models covertly employed similar computational processes, predicting the  
388 same behavior despite differences in form. A generate-and-recover analysis,  
389 however, confirmed that they truly employed different processes (Heathcote  
390 et al., 2015; Wilson and Collins, 2019; Appendix 6.3.5).

391 We next asked whether both models captured similar aspects of cognition  
392 by assessing how correlated parameters were between models. Parameters  
393  $p$  and  $\beta$  were almost perfectly correlated between models (both  $\rho > 0.94$ ,  
394  $p < 0.05$ ), suggesting high consistency between models when estimating  
395 choice processes (Fig. 5B). Parameter  $p_{reward}$  (BI) was strongly correlated  
396 with  $\alpha_-$  (RL), suggesting that beliefs about task stochasticity and learning  
397 rates for negative outcomes played similar roles across models, presumably in  
398 participants' response to negative outcomes. The other mental-model param-  
399 eter,  $p_{switch}$  (BI), was strongly negatively correlated with  $\beta$  (RL), suggesting  
400 that beliefs about task volatility in the BI model captured aspects that were  
401 explained by decision noise in the RL model. This is consistent with the  
402 observation that an agent that expects high volatility could be mistaken for  
403 one that acts with large noise, given that both will make choices that are  
404 inconsistent with previous outcomes. The only parameter that showed no  
405 large correlations with other parameters was  $\alpha_+$  (RL), potentially reflecting a

406 cognitive process uniquely captured by RL. Taken together, some parameters  
407 likely captured similar cognitive processes in both models, despite differences  
408 in their functional form, shown by large correlations between models. Other  
409 parameters were more unique, potentially reflecting model-specific cognitive  
410 processes. Further analyses confirmed high shared explained variance be-  
411 tween both models, using multiple regression (section 6.3.7).

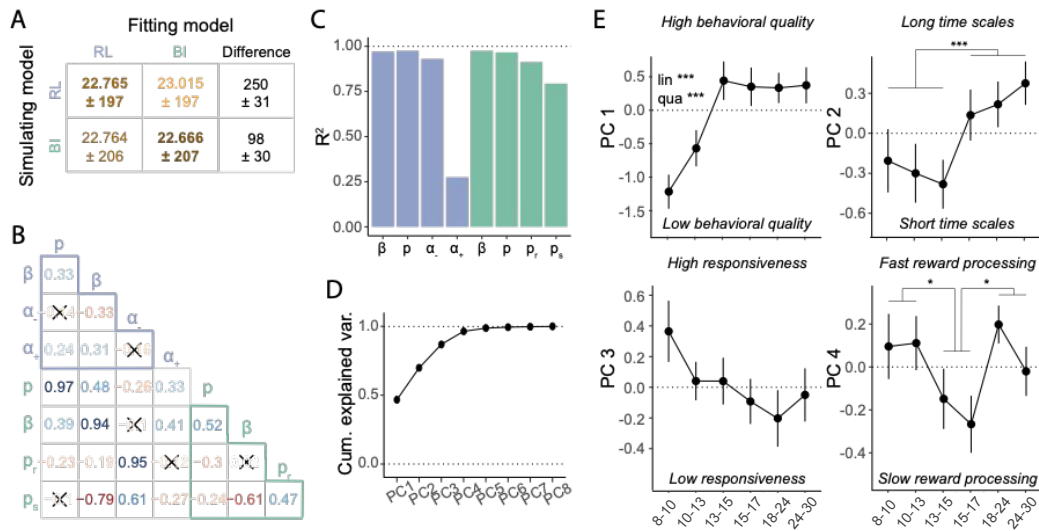

Figure 5: Relating RL and BI models. (A) Model recovery. WAIC scores were worse (larger; lighter colors) when recovering behavior that was simulated from one model (row) using the other model (column), than when using the same model (diagonal), revealing that the models were discriminable. The difference in fit was smaller for BI simulations (bottom row), suggesting that the RL model captured BI behavior better than the other way around (top row). (B) Spearman pairwise correlations between model parameters. Red (blue) hue indicates negative (positive) correlation, saturation indicates correlation strength. Non-significant correlations are crossed out (Bonferroni-corrected at  $p = 0.00089$ ). Light-blue (teal) letters refer to RL (BI) model parameters. Light-blue / teal-colored triangles show correlations within each model, remaining cells show correlations between models. (C) Variance of each parameter explained by parameters and interactions of the other model (“ $R^2$ ”), estimated through linear regression. All four BI parameters (green) were predicted almost perfectly by the RL parameters, and all RL parameters except for  $\alpha_+$  (RL) were predicted by the BI parameters. (D)-(E) Results of PCA on model parameters. (D) Cumulative variance explained by all principal components PC1-8. The first four components captured 96.5% of total parameter variance. (E) Age-related differences in PC1-4: PC1 reflected overall behavioral quality and showed rapid development between ages 8-13, which were captured by linear (“lin”) and quadratic (“qua”) effects in a regression model. PC2 captured a step-like transition from shorter to longer updating time scales at age 15, as revealed by PC-based model simulations (Supplements). PC3 showed no significant age effects. PC4 captured the variance in  $\alpha_+$  and differed between adolescents 15-17 and both 8-13 year olds and adults. PC2 and PC4 were analyzed using t-tests. \*  $p < .05$ ; \*\*  $p < .01$ , \*\*\*  $p < .001$ .

412 So far, we have provided two separate cognitive explanations for why  
413 adolescents performed better than other age groups: RL poses differences  
414 in value learning as the main driver, whereas BI poses differences in mental  
415 model-based inference. Could a single, broader explanation combine these  
416 insights and provide more general understanding of adolescent cognitive pro-  
417 cessing? To test this, we used PCA to unveil the lower-dimensional structure  
418 embedded in the 8-dimensional parameter space created by both models (for  
419 details, see section 4.5.5). We found that the PCA's first four principle com-  
420 ponents (PCs) explained almost all variance (96.5%; Fig. 5D), showing that  
421 individual differences in all 8 model parameters could be summarized by just  
422 4 abstract cognitive dimensions, which distill the insights of both models  
423 while abstracting away redundancies. To understand what these abstract  
424 dimensions reflected, we used a simulation-based approach that took advan-  
425 tage of the fact that each PC was a linear combination of the original model  
426 parameters (Table 14), such that we could directly simulate effects of PCs  
427 on behavior using our computational models.

428 This analysis revealed that PC1, capturing the largest proportion of pa-  
429 rameter variance, reflected a broad measure of behavioral quality; PC2 rep-  
430 resented integration time scales; PC3 captured responsiveness to task out-  
431 comes; and PC4 uniquely captured RL parameter  $\alpha_+$ . A detailed description  
432 of each PC is provided in supplement 6.3.8. Three of these four PCs (PC1,  
433 PC2, and PC4) showed prominent age effects: PC1 (behavioral quality) in-  
434 creased drastically until age 13, at which it reached a stable plateau that

435 lasted—unchanged—throughout adulthood (Fig. 5E, top-left). Regression  
436 models revealed significant linear and quadratic effects of age on PC1 (lin.:  
437  $\beta = -0.47$ ,  $t = -4.0$ ,  $p < 0.001$ ; quad.:  $\beta = 0.011$ ,  $t = 3.43$ ,  $p < 0.001$ ), with  
438 no effect of sex ( $\beta = 0.020$ ,  $t = 0.091$ ,  $p = 0.93$ ). This suggests that the left  
439 side of the U-shaped trajectory in task performance (Fig. 2; suppl. Fig. 7;  
440 Fig. 3C-F) might be caused by the development of behavioral quality (PC1):  
441 The peak in 13-to-15-year-olds compared to younger participants could be  
442 explained by the fact that 13-to-15-year-olds had already reached adult levels  
443 of behavioral quality, while younger participants showed noisier, less focused,  
444 and less consistent behavior.

445 By contrast, PC2 (updating time scales) followed a step function, such  
446 that participants in the three youngest age bins (8-15 years) acted on shorter  
447 times scales than participants in the three oldest bins (15-30; Fig. 5E, top-  
448 right; post-hoc t-test comparing both groups:  $t(266.2) = 3.44$ ,  $p < 0.001$ ).  
449 This pattern is in accordance with the interpretation that children's shorter  
450 time scales, facilitating rapid behavioral switches (suppl. Fig. 19B, left),  
451 were more beneficial for the current task than adults' longer time scales,  
452 which impeded switching (suppl. Fig. 19B, right). Differences in subjective  
453 time scale might therefore be the determining factor that allowed adolescents  
454 to outperform older participants, including adults.

455 PC4 (positive updates) differentiated the two adolescent age bins (13-17)  
456 from both younger (8-13) and older (18-30) participants (Fig. 5E, bottom-  
457 right), as revealed by significant post-hoc, Bonferroni-corrected, t-tests (8-13

458 vs 13-17:  $t(176.8) = 2.28$ ,  $p = 0.047$ ; 13-17 vs 18-30:  $t(176.6) = 2.49$ ,  
459  $p = 0.028$ ). In other words, after accounting for variance in PC1-PC3, the  
460 remaining variance was explained by 13-to-17-year-olds' relatively longer up-  
461 dating timescales for positive outcomes (positive outcomes had relatively  
462 weaker immediate, but stronger long-lasting effects). In sum, the PCA re-  
463 vealed four dimensions that combine the findings of both computational mod-  
464 els, potentially allowing for model-independent insights into developmental  
465 cognitive differences: Adolescents' unique competence in our task might be  
466 result of adult-like behavioral quality in combination with child-like time  
467 scales and unique adolescent processing of positive feedback.

### 468 **3. Discussion**

469 Across species, the adolescent transition brings great challenges for learn-  
470 ing and exploration, which may have caused the adolescent brain to evolve  
471 behavioral tendencies that promote adaptive learning in rapidly changing,  
472 uncertain environments (Dahl et al., 2018). To test this idea, we examined  
473 the choice behavior of a large sample across a wide age range in a volatile  
474 and stochastic reversal task adapted from rodent studies (Tai et al., 2012).  
475 This research fills a knowledge gap regarding the adolescent development of  
476 reversal learning (also see Hauser et al., 2015; Javadi et al., 2014; van der  
477 Schaaf et al., 2011), inspired by rapidly-expanding research highlighting the  
478 developmentally-unique role of adolescence across socio-emotional and cog-  
479 nitive contexts (Dahl et al., 2018; DePasque and Galván, 2017; Lloyd et al.,

480 2020; Lourenco and Casey, 2013; Sercombe, 2014), and by the non-linear  
481 development of neural and endocrine systems underlying reversal learning  
482 (Blakemore et al., 2010; Braams et al., 2015; Giedd et al., 1999; Piekarski,  
483 Johnson, et al., 2017; Somerville and Casey, 2010; Sowell et al., 2003; Toga  
484 et al., 2006).

### 485 *3.1. Summary of Findings*

486 We observed an adolescent peak in performance, which was evident in  
487 adolescents' highest overall accuracy (Fig. 2A) and winning most points  
488 (suppl. Fig. 7A, E). This peak was associated with adolescents' increased  
489 willingness to ignore non-diagnostic negative feedback (Fig. 2C) and to show  
490 persistent choices during stable task periods (Fig. 2D). Adolescents used neg-  
491 ative feedback most optimally to guide future choices, being least affected by  
492 proximal, but most sensitive to distal outcomes (suppl. Fig. 7C, D, G, H).  
493 These findings support our prediction that adolescents make better decisions  
494 in volatile and stochastic environments, potentially due to differences in neg-  
495 ative feedback processing, in accordance with prior research that has shown  
496 unique feedback processing in adolescents (e.g., Christakou et al., 2013; Davi-  
497 dow et al., 2016; Palminteri et al., 2016; van den Bos et al., 2009; for review,  
498 see Lourenco and Casey, 2013).

499 Which cognitive processes underlie this performance advantage? Ado-  
500 lescents might learn at different speeds than younger or older participants,  
501 as suggested, e.g., by Davidow et al., 2016, or might process particular feed-

502 back types differently (e.g., Palminteri et al., 2016). These hypotheses can be  
503 tested using computational modeling in the RL framework, which explicitly  
504 estimates learning rates for different kinds of feedback.

505 It is also possible, however, that adolescents outperformed other partici-  
506 pants due to a better understanding of the task dynamics, which would allow  
507 them to predict more accurately whether a switch had occurred, for example.  
508 Indeed, others have argued that both “model-based” behavior (Decker et al.,  
509 2016) and the tendency to employ counterfactual reasoning (Palminteri et  
510 al., 2016) increase with age, in accordance with age differences in mental  
511 task models. This hypothesis can be tested using computational modeling in  
512 the BI framework, which explicitly estimates the parameters of participants’  
513 mental models and inference processes.

514 Furthermore, adolescents might explore differently (Gopnik et al., 2017;  
515 Lloyd et al., 2020; Somerville et al., 2017) or might be more persistent, a  
516 behavioral pattern commonly linked to the PFC (Kehagia et al., 2010; Mor-  
517 ris et al., 2016), which continues maturation during adolescence (DePasque  
518 and Galván, 2017; Giedd et al., 1999; Toga et al., 2006). Whereas the previ-  
519 ous hypotheses targeted the “updating” step of decision making, these two  
520 concern the “choice” step, and can be tested in both RL and BI frameworks.

521 Our study revealed that several explanations exist for adolescents’ supe-  
522 rior performance: The RL model showed reduced learning speeds for negative  
523 outcomes (Fig. 4C), supporting the hypothesis in terms of differential feed-  
524 back responses. The BI model suggested improved mental models, support-



525 ing the hypothesis about differences in mental models and inference (Fig. 4G,  
526 H). Crucially, the quantitative fit of both models to human data was similar  
527 (Table 2), and they both qualitatively reproduced human behavior in simula-  
528 tion (Fig. 3), suggesting that both explanations are valid. Furthermore, both  
529 models agreed on developmental differences in exploration/exploitation and  
530 persistence, as suggested by the last hypotheses. However, these differences  
531 were unlikely the cause for the adolescent advantage because they showed  
532 monotonic trajectories between childhood and adulthood (Fig. 4A, B, E,  
533 G), rather than an adolescent peak. Taken together, our study suggests that  
534 adolescents make better decisions in stochastic and volatile environments  
535 than younger or older people, due to non-monotonic age differences in neg-  
536 ative feedback processing and mental model accuracy, which peak during  
537 adolescence.

538 Both explanations, however, are framed within a specific computational  
539 model. Can we draw more general conclusions? Combining the unique in-  
540 sights of each model while stripping away redundancies, our PCA investi-  
541 gation revealed that developmental changes might be captured by three ab-  
542 stract, model-independent dimensions that vary with age: behavioral qual-  
543 ity (PC1), time scales (PC2), and reward processing (PC4). Behavioral  
544 quality—likely capturing sufficient understanding of the task and experimen-  
545 tal context, participant compliance, attentional focus, etc.—reached adult  
546 levels in early adolescence and showed no more age-related differences there-  
547 after. Time scales, on the other hand—likely capturing an extended planning

548 horizon, long-term credit assignment, memory, prolonged attention, etc.—  
549 only started to increase during late adolescence, in accordance with our be-  
550 havioral measure of flexibility (6.3.1). Finally, reward processing was slower  
551 during adolescence compared to younger or older ages. Taken together, ado-  
552 lescents’ behavioral advantage might be a combination of already adult-like  
553 quality of behavior, still child-like time scales, and unique reward processing.

### 554 3.2. *Setting or Adaptation?*

555 These findings can be interpreted in two ways (Nussenbaum and Hartley,  
556 2019): 1) Based on a *settings* account, adolescents integrate negative feed-  
557 back more slowly than other age groups ( $\alpha_-$ ), expect fewer rewards ( $p_{reward}$ )  
558 and less volatility ( $p_{switch}$ ), and achieve adult-like behavioral quality (PC1),  
559 but child-like short time scales (PC2) and slow reward processing (PC4).  
560 These “settings” are developmentally fixed, i.e., expected to guide behavior  
561 across experiments and real-life situations. 2) The *adaptation* account, on  
562 the other hand, states that adolescents chose the most appropriate cogni-  
563 tive settings specifically for the current task, and might have chosen different  
564 settings in different contexts. Our results therefore highlight adolescents’  
565 adaptability to volatile and stochastic environments.

566 A recent review (Nussenbaum and Hartley, 2019) showed favorable em-  
567 pirical evidence for the adaptation account compared to settings, given that  
568 specific parameter values differ widely between studies, whereas parameter  
569 adaptiveness is more consistent (also see Eckstein, Master, et al., 2021; Eck-

570 stein, Wilbrecht, et al., 2021). Another argument for adaption is that adoles-  
571 cents exhibited *balanced* learning in a previous study (van der Schaaf et al.,  
572 2011), responding similarly to rewards and punishment (Fig. 3A; children  
573 and adults responded more strongly to punishment and rewards, respec-  
574 tively). In our study, however, adolescents exhibited the most *imbalanced*  
575 learning of all age groups, responding least strongly to negative feedback.  
576 This shows a contradiction between both studies based on a settings view.  
577 However, both studies agree in that adolescents adapted best to the specific  
578 task demands, supporting an adaptation-based view: In van der Schaaf et  
579 al., 2011, both positive and negative outcomes were diagnostic, requiring bal-  
580 anced learning, whereas in our study, only positive outcomes were diagnostic,  
581 requiring imbalanced learning.

582 Taken together, the specific parameter values obtained in this study likely  
583 shed less light on specific adolescent behavioral tendencies related to nega-  
584 tive feedback processing, prior expectations about environmental volatility  
585 and stochasticity, etc., but showcase the increased ability to quickly and  
586 effortlessly adapt to stochastic and volatile tasks.

### 587 3.3. General Cognitive Abilities

588 A caveat of our study is the use of a cross-sectional rather than longitudi-  
589 nal design. We cannot exclude, for example, that adolescents had higher IQ  
590 scores, better schooling, or higher socio-economic status than participants of  
591 other ages. If this was the case, the performance peak in adolescence might

592 reflect a difference in task-unrelated factors rather than unique adaptation to  
593 stochasticity and volatility. However, several arguments speak against this  
594 possibility, including recruitment procedures, supplementary analyses, and  
595 the distinctness of the U-shaped pattern observed in this task compared to  
596 the linear trajectories observed in other tasks performed by the same sample  
597 (see section 6.4.1).

### 598 *3.4. A Role of Puberty?*

599 Despite showing specific age-related differences, our study does not eluci-  
600 date which biological mechanisms underlie these. There is growing evidence  
601 that gonadal hormones affect inhibitory neurotransmission, spine pruning,  
602 and other variables in the prefrontal cortex of rodents (Delevich et al., 2019;  
603 Delevich et al., 2018; Drzewiecki et al., 2016; Juraska and Willing, 2017;  
604 Piekarski, Boivin, et al., 2017; Piekarski, Johnson, et al., 2017), and evidence  
605 for puberty-related neurobehavioral change is also accumulating in human  
606 studies (Blakemore et al., 2010; Braams et al., 2015; Gracia-Tabuenca et al.,  
607 2021; Laube, van den Bos, et al., 2020; Op de Macks et al., 2016), suggesting  
608 that puberty-related changes in brain chemistry might be a mechanism be-  
609 hind the observed differences. We assessed pubertal status and investigated  
610 its role in the developmental changes we observed (see section 6.3.3). While  
611 some trends emerged that deserve more detailed investigation in future re-  
612 search, particularly with regard to early puberty, our study was inconclusive  
613 on this issue.

614 *3.5. Dual-Model Approach to Cognitive Modeling*

615 Basic RL and BI (as described in section 1.3) employ different cognitive  
616 mechanisms (see sections 4.5.1 and 4.5.2) and predict different behaviors on  
617 our task (suppl. Fig. 16 and 17), justifying their combined use to gain  
618 additive insights. However, we augmented each model to approximate hu-  
619 mans, leading to more similar behavior—and potentially overlapping cog-  
620 nitive mechanisms. Is this a problem for our dual-model approach?

621 Two arguments justify the approach: 1) Both models *explain* the cog-  
622 nitive process differently. Whereas RL explains it in terms of learning and dif-  
623 ferentiation of outcome types, BI explains it in terms of mental-model based  
624 predictions and inference. Hence, invoking different cognitive concepts, both  
625 explanations are non-redundant and provide additive insights. 2) Both mod-  
626 els also *differ* in meaningful ways, both behaviorally (Fig. 5A; suppl. Fig.  
627 18; suppl. section 6.3.6) and in terms of the cognitive processes captured by  
628 model parameters (Fig. 5B and C). This implies that both models capture  
629 different aspects of human cognitive processing, providing additive insights.

630 Taking a step back, the most common computational modeling approach  
631 selects a family of candidate models (e.g., RL) and identifies the best-fitting  
632 one, interpreting it as the cognitive process employed by participants. An  
633 issue with this approach is that a model from a different family (e.g., BI)  
634 might provide a better fit than any of the tested models. To address this  
635 issue, we fitted models of multiple families, ensuring large coverage of the  
636 space of cognitive hypotheses.

637 However, a difficulty with our approach is that in addition to quantita-  
638 tive criteria of model fit (e.g., fit, complexity; Bayes factor, AIC; Mulder  
639 and Wagenmakers, 2016; Pitt and Myung, 2002; Watanabe, 2013), qualita-  
640 tive criteria become increasingly important (e.g., interpretability, appropri-  
641 ateness for current hypotheses, conciseness, generality; Blohm et al., 2020;  
642 Kording et al., 2020; Uttal, 1990; Webb, 2001). However, qualitative crite-  
643 ria are more difficult to assess because they depend on scientific goals (e.g.,  
644 explanation versus prediction; Bernardo and Smith, 2009; Navarro, 2019)  
645 and research philosophy (Blohm et al., 2020). Furthermore, qualitative and  
646 quantitative criteria can be at odds, inconveniencing model selection (Jacobs  
647 and Grainger, 1994). To alleviate these issues, we focused on a range of cri-  
648 teria, including numerical fit (WAIC; slight advantage for RL), reproduction  
649 of participant behavior (equally good), continuity with previous neuroscien-  
650 tific research (RL), link to specific neural pathways (RL), centrality for de-  
651 velopmental research (equal), claimed superiority in current paradigm (BI),  
652 and interpretability (BI: model parameters map directly onto main concepts  
653  $p_{switch}$ : stochasticity,  $p_{reward}$ : volatility). Because this survey did not produce  
654 a clear winner, and both models fitted excellently without being redundant,  
655 we opted to select two winners. This provided the benefits of *converging*  
656 *evidence* (e.g., replication:  $\beta_{RL} \leftrightarrow \beta_{BI}$ ,  $p_{RL} \leftrightarrow p_{BI}$ ; parallelism between  
657 models:  $p_{reward} \leftrightarrow \alpha_-$ ), *distinct insights* (e.g., RL: importance of learning,  
658 differential processing of feedback types; BI: importance of inference, mental  
659 models), and the possibility to *combine* both models to expose more abstract

660 factors (PC1, PC2, PC4) that differentiate adolescent cognitive processing  
661 from younger and older participants.

### 662 3.6. Conclusion

663 In conclusion, we showed that adolescents outperformed younger par-  
664 ticipants and adults in a volatile and uncertain context, two factors that  
665 might have specific relevance in the transition of adolescence. We used two  
666 computational models to examine the cognitive processes underlying this de-  
667 velopment, RL and BI. These models suggested that adolescents achieved  
668 better performance for different reasons: (1) They were best at accurately  
669 assessing the volatility and stochasticity of the environment, and integrated  
670 negative outcomes most appropriately (U-shapes in  $p_{reward}$ ,  $p_{switch}$ , and  $\alpha_-$ ).  
671 (2) They combined adult-like behavioral quality (PC1), child-like time scales  
672 (PC2), and developmentally-unique processing of positive outcomes (PC4).  
673 Pubertal development and steroid hormones may impact a subset of these  
674 processes, yet causality is difficult to determine without manipulation or lon-  
675 gitudinal designs (Kraemer et al., 2000).

676 For purposes of translation from the lab to the “real world”, our study  
677 indicates that how youth learn and decide changes in a nonlinear fashion  
678 as they grow. This underscores the importance of youth-serving programs  
679 that are developmentally informed and avoid a one-size-fits-all approach.  
680 Finally, these data support a positive view of adolescence and the idea that  
681 the adolescent brain exhibits remarkable learning capacities that should be

682 celebrated.

## 683 4. Methods

### 684 4.1. Participants

685 All procedures were approved by the Committee for the Protection of Hu-  
686 man Subjects at the University of California, Berkeley. We tested 312 partic-  
687 ipants: 191 children and adolescents (ages 8-17) and 55 adults (ages 25-30)  
688 were recruited from the community, using online ads (e.g., on neighborhood  
689 forums), flyers at community events (e.g., local farmers markets), and phys-  
690 icals posts in the neighborhood (e.g., printed ads). Community participants  
691 completed a battery of computerized tasks, questionnaires, and saliva sam-  
692 ples (Master et al., 2020). In addition, 66 university undergraduate students  
693 (aged 18-50) were recruited through UC Berkeley’s Research Participation  
694 Pool, and completed the same four tasks, but not the pubertal-development  
695 questionnaire (PDS; Petersen et al., 1988) or saliva sample. Community par-  
696 ticipants were prescreened for the absence of present or past psychological  
697 and neurological disorders; the undergraduate sample indicated the absence  
698 of these. Community participants were compensated with 25\$ for the 1-  
699 2 hour in-lab portion of the experiment and 25\$ for completing optional  
700 take-home saliva samples; undergraduate students received course credit for  
701 participation.

702 *Exclusion Criteria.* Out of the 191 participants under 18, 184 completed  
703 the current task; reasons for not completing the task included getting tired,  
704 running out of time, and technical issues. Five participants (mean age 10.0  
705 years) were excluded because their mean accuracy was below 58% (chance:  
706 50%), an elbow point in accuracy, which suggests they did not pay attention  
707 to the task. This led to a sample of 179 participants under 18 (male: 96,  
708 female: 83). Two participants from the undergraduate sample were excluded  
709 because they were older than 30, leading to a sample aged 18-28; 7 were  
710 excluded because they failed to indicate their age. This led to a final sam-  
711 ple of 57 undergraduate participants (male: 19, female: 38). All 55 adult  
712 community participants (male: 26, female: 29) completed the task and were  
713 included in the analyses, leading to a sample size of 179 participants below  
714 18, and 291 in total (suppl. Fig. 8).



#### 715 4.2. *Testing Procedure*

716 After entering the testing room, participants under 18 years and their  
717 guardians provided informed assent and permission, respectively; partici-  
718 pants over 18 provided informed consent. Guardians and participants over  
719 18 filled out a demographic form. Participants were led into a quiet testing  
720 room in view of their guardians, where they used a video game controller to  
721 complete four computerized tasks (for more details about the other tasks, see  
722 Eckstein, Master, et al., 2021; Master et al., 2020; Xia et al., 2020; for a com-  
723 parison of all tasks, see Eckstein, Master, et al., 2021; Eckstein, Wilbrecht,  
724 et al., 2021). At the conclusion of the tasks, participants between 11 and  
725 18 completed the PDS questionnaire, were measured in height and weight,  
726 and compensated with \$25 Amazon gift cards. The entire session took 2-3  
727 hours for community participants (e.g., some younger participants took more  
728 breaks), and 1 hour for undergraduate participants (who did not complete  
729 the puberty measures and saliva sample). We paid great attention to the  
730 fact that participants took sufficient breaks between tasks to avoid excessive  
731 fatigue and limit the effects of the differences in testing duration.

#### 732 4.3. *Task Design*

733 The goal of the task was to collect golden coins, which were hidden in  
734 one of two boxes. On each trial, participants decided which box to open,  
735 and either received a reward (coin) or not (empty). Task contingencies—  
736 i.e., which box was correct and therefore able to produce coins—switched  
737 unpredictably throughout the task (Fig. 1B). Before the main task, partici-  
738 pants completed a 3-step tutorial: 1) A prompt explained that only one of  
739 the boxes contained a coin (was “magical”), and participants completed 10  
740 practice trials on which one box was always rewarded and the other never  
741 (deterministic phase). 2) Another prompt explained that the magical box  
742 sometimes switches sides, and participants received 8 trials on which only  
743 second box was rewarded, followed by 8 trials on which only the first box  
744 was rewarded (switching phase). 3) The last prompt explained that the magi-  
745 cal box did not always contain a coin, and led into the main task with  
746 120 trials.

747 In the main task, the correct box was rewarded in 75% of trials; the in-  
748 correct box was never rewarded. After participants reached a performance  
749 criterion, it became possible for contingencies to switch (without notice),  
750 such that the previously incorrect box became the correct one. The per-  
751 formance criterion was to collect 7-15 rewards, with the specific number

752 pre-randomized for each block (any number of non-rewarded trials was al-  
753 lowed in-between rewarded trials). Switches only occurred after rewarded  
754 trials, and the first correct choice after a switch was always rewarded (while  
755 retaining an average of 75% probability of reward for correct choices), for  
756 consistency with the rodent task (Tai et al., 2012).

#### 757 4.4. Behavioral Analyses

758 We calculated age-based rolling performance averages by averaging the  
759 mean performance of 50 subsequent participants ordered by age. Standard  
760 errors were calculated in the same way.

761 We assessed the effects of age on behavioral outcomes (Fig. 2), using  
762 (logistic) mixed-effects regression models using the package lme4 (Bates et al.,  
763 2015) in R (RCoreTeam, 2016). All models included the following regressors  
764 to predict outcomes (e.g., overall accuracy, response times): Z-scored age,  
765 to assess the linear effect of age on the outcome; squared, z-scored age, to  
766 assess the quadratic (U-shaped) effect of age; and sex; furthermore, all models  
767 specified random effects of participants, allowing participants' intercepts and  
768 slopes to vary independently. Additional predictors are noted in the main  
769 text.

770 We assessed the effects of previous outcomes on participants' choices  
771 (suppl. Fig. 7B, C, E, F) using logistic mixed-effects regression, predict-  
772 ing actions (left, right) from previous outcomes (details below), while testing  
773 for effects of and interactions with sex, z-scored age, and z-scored quadratic  
774 age, specifying participants as mixed effects. We included one predictor for  
775 positive and one for negative outcomes at each delay  $i$  with respect to the  
776 predicted action (e.g.,  $i = 1$  trial ago). Outcome predictors were coded -1  
777 for left and +1 for right choices (0 otherwise). Including predictors of trials  
778  $1 \leq i \leq 8$  provided the best model fit (suppl. Table 7). To visualize the  
779 results of this model including all participants, we also ran separate models  
780 for each participant (suppl. Fig. 7B, C, E, F).

#### 781 4.5. Computational Models

##### 782 4.5.1. Reinforcement Learning (RL) Models

A basic RL model has two parameters, learning rate  $\alpha$  and decision tem-  
perature  $\beta$ . On each trial  $t$ , the value  $Q_t(a)$  of action  $a$  is updated based on  
the observed outcome  $o_t \in [0, 1]$  (no reward, reward):

$$Q_{t+1}(a) = Q_t(a) + \alpha(o_t - Q_t(a))$$

Action values inform choices probabilistically, based on a softmax transformation:

$$p_t(a) = \frac{\exp(\beta Q_t(a))}{\exp(\beta Q_t(a)) + \exp(\beta Q_t(a_{ns}))}$$

783 Here,  $a$  is the selected, and  $a_{ns}$  the non-selected action.

784 Compared to this basic 2-parameter model, the best-fit 4-parameter model  
785 was augmented by splitting learning rates into  $\alpha_+$  and  $\alpha_-$ , adding persistence  
786 parameter  $p$ , and the ability for counterfactual updating. We explain each in  
787 turn: Splitting learning rates allowed to differentiate updates for rewarded  
788 ( $o_t = 1$ ) versus non-rewarded ( $o_t = 0$ ) trials, with independent  $\alpha_-$  and  $\alpha_+$ :

$$Q_{t+1}(a) = \begin{cases} Q_t(a) + \alpha_+(o_t - Q_t(a)), & \text{if } o_t = 1 \\ Q_t(a) + \alpha_-(o_t - Q_t(a)), & \text{if } o_t = 0 \end{cases}$$

789 Choice persistence or “stickiness”  $p$  changed the value of the previously-  
790 selected action  $a_t$  on the subsequent trial, biasing toward staying ( $p > 0$ ) or  
791 switching ( $p < 0$ ):

$$Q_{t+1}(a) = \begin{cases} Q_{t+1}(a) + p, & \text{if } a_t = a_{t-1} \\ Q_{t+1}(a), & \text{if } a_t \neq a_{t-1} \end{cases}$$

792 Counterfactual updating allows updates to non-selected actions based on  
793 counterfactual outcomes  $1 - o_t$ :

$$Q_{t+1}(a_{ns}) = \begin{cases} Q_t(a_{ns}) + \alpha_+((1 - o_t) - Q_t(a_{ns})), & \text{if } o = 1 \\ Q_t(a_{ns}) + \alpha_-((1 - o_t) - Q_t(a_{ns})), & \text{if } o = 0 \end{cases}$$

794 Initially, we used four parameters  $\alpha_+$ ,  $\alpha_{+c}$ ,  $\alpha_-$ , and  $\alpha_{-c}$  to represent each  
795 combination of value-based (“+” versus “-”) and counter-factual (“c”) versus  
796 factual updating, but collapsing  $\alpha_+ = \alpha_{+c}$  and  $\alpha_- = \alpha_{-c}$  improved model  
797 fit (Table 2). This suggests that outcomes triggered equal-sized updates to  
798 chosen and unchosen actions.

799 This final model can be interpreted as basing decisions on a single value  
800 estimate (value difference between both actions), rather than independent  
801 value estimates for each action because chosen and unchosen actions were  
802 updated to the same degree and in opposite directions on each trial. Action  
803 values were initialized at 0.5 for all models.

804 4.5.2. Bayesian Inference (BI) Models

805 The BI model is based on two hidden states: “Left action is correct”  
806 ( $a_{left} = cor$ ) and “Right action is correct” ( $a_{right} = cor$ ). On each trial, the  
807 hidden state switches with probability  $p_{switch}$ . In each state, the probability  
808 of receiving a reward for the correct action is  $p_{reward}$  (Fig. 3A). On each  
809 trial, actions are selected in two phases, using a Bayesian Filter algorithm  
810 (Sarkka, 2013): (1) In the *estimation phase*, the hidden state of the previous  
811 trial  $t - 1$  is inferred based on outcome  $o_{t-1}$ , using Bayes rule:

$$p(a_{t-1} = cor | o_{t-1}) = \frac{p(o_{t-1}|a_{t-1} = cor) p(a_{t-1} = cor)}{p(o_{t-1}|a_{t-1} = cor) p(a_{t-1} = cor) + p(o_{t-1}|a_{t-1} = inc) p(a_{t-1} = inc)}$$

812  $p(a_{t-1} = cor)$  is the prior probability that  $a_{t-1}$  is correct (on the first  
813 trial,  $p(a = cor) = 0.5$  for  $a_{left}$  and  $a_{right}$ ).  $p(o_{t-1}|a_{t-1})$  is the likelihood  
814 of the observed outcome  $o_{t-1}$  given action  $a_{t-1}$ . Likelihoods are (dropping  
815 underscripts for clarity):  $p(o = 1|a = cor) = p_{reward}$ ,  $p(o = 0|a = cor) =$   
816  $1 - p_{reward}$ ,  $p(o = 1|a = inc) = \epsilon$ , and  $p(o = 0|a = cor) = 1 - \epsilon$ .  $\epsilon$  is  
817 the probability of receiving a reward for an incorrect action, which was 0 in  
818 reality, but set to  $\epsilon = 0.0001$  to avoid model degeneracy.

819 (2) In the *prediction phase*, the possibility of state switches is taken into  
820 account by propagating the inferred hidden-state belief at  $t - 1$  forward to  
821 trial  $t$ :

$$p(a_t = cor) = (1 - p_{switch}) p(a_{t-1} = cor) + p_{switch} p(a_{t-1} = inc)$$

822 We first assessed a parameter-free version of the BI model, truthfully  
823 setting  $p_{reward} = 0.75$ , and  $p_{switch} = 0.05$ . Lacking free parameters, this  
824 model was unable to capture individual differences and led to poor qualitative  
825 (suppl. Fig. 17A) and quantitative model fit (Table 2). The best-fit BI model  
826 had four free parameters:  $p_{reward}$  and  $p_{switch}$ , as well as the choice parameters  
827  $\beta$  and  $p$ , like the winning RL model.  $\beta$  and  $p$  were introduced by applying a  
828 softmax to  $p(a_t = cor)$  to calculate  $p(a_t)$ , the probability of selecting action  
829  $a$  on trial  $t$ :

$$p(a_t) = \frac{1}{(1 + \exp(\beta(0.5 - p - p(a_t = cor))))}$$

830 When both actions had the same probability and persistence  $p > 0$ , then  
831 staying was more likely; when  $p < 0$ , then switching was more likely.

### 832 4.5.3. Model Fitting and Comparison

We fitted parameters using hierarchical Bayesian methods (Katahira, 2016; M. D. Lee, 2011; van den Bos et al., 2017; Fig. 3B), whose parameter recovery clearly superseded those of classical maximum-likelihood fitting (suppl. Fig. 6). Rather than fitting individual participants, hierarchical Bayesian model fitting estimates the parameters of a population jointly by maximizing the posterior probability  $p(\theta|data)$  of all parameters  $\theta$  conditioned on the observed  $data$ , using Bayesian inference:

$$p(\theta|data) \propto p(data|\theta) p(\theta)$$

833 An advantage of hierarchical Bayesian model fitting is that individual param-  
834 eters are embedded in a hierarchical structure of priors, which helps resolve  
835 uncertainty at the individual level.

836 We ran two models to fit parameters: The “age-less” model was used to  
837 estimate participants’ parameters in a non-biased way and conduct binned  
838 analyses on parameter differences; the “age-based” model was used to statis-  
839 tically assess the shapes of parameters’ age trajectories. In the age-less model,  
840 each individual  $j$ ’s parameters  $\theta_j^{RL} = [p, \beta, \alpha_-, \alpha_+]$  or  $\theta_j^{BI} = [p, \beta, p_{switch}, p_{reward}]$   
841 were drawn from group-based prior parameter distributions. Parameters  
842 were drawn from appropriately-shaped prior distributions, limiting ranges  
843 where necessary, which were based on non-informative, appropriate hyper-  
844 priors (suppl. Table 5).

845 Next, we fitted the model by determining the group-level and individual  
846 parameters with the largest posterior probability under the behavioral data  
847  $p(\theta|data)$ . Because  $p(\theta|data)$  was analytically intractable, we approximated  
848 it using Markov-Chain Monte Carlo sampling, using the no-U-Turn sampler  
849 from the PyMC3 package in python (Salvatier et al., 2016). We ran 2 chains  
850 per model with 6,000 samples per chain, discarding the first 1,000 as burn-  
851 in. All models converged with small MC errors, sufficient effective sample  
852 sizes, and  $\hat{R}$  close to 1 (suppl. Table 6). For model comparison, we used  
853 the Watanabe-Akaike information criterion (WAIC), which estimates the ex-  
854 pected out-of-sample prediction error using a bias-corrected adjustment of  
855 within-sample error (Watanabe, 2013).

856 To obtain participants’ individual fitted parameters, we calculated the

857 means over all posterior samples (Fig. 4, suppl. Figures 15, 16, and 17).  
858 To test whether a parameter  $\theta$  differed between two age groups  $a1$  and  $a2$ ,  
859 we determined the number of MCMC samples in which the parameter was  
860 larger in one group than the other, i.e., the expectation  $\mathbb{E}(\theta_{a1} < \theta_{a2})$  across  
861 MCMC samples.  $p < 0.05$  was used to determine significance. This concludes  
862 our discussion of the age-less model, which was used to calculate individual  
863 parameters in an unbiased way.

864 To adequately assess the age trajectories of fitted parameters, we em-  
865 ployed a fitting technique based on hierarchical Bayesian model fitting (Katahira,  
866 2016; M. D. Lee, 2011), which avoids biases that arise when comparing pa-  
867 rameters between participants that have been fitted using maximum-likelihood  
868 (van den Bos et al., 2017), and allows to test specific hypotheses about param-  
869 eter trajectories by explicitly modeling these trajectories within the fitting  
870 framework: We conducted a separate “age-based” model, in which model pa-  
871 rameters were allowed to depend on participants’ age (Fig. 3B). Estimating  
872 age effects directly within the computational model allowed us to estimate  
873 group-level effects in an unbiased way, whereas flat (hierarchical) models that  
874 estimate parameters but not age effects would underestimate (overestimate)  
875 group-level effects, respectively (Boehm et al., 2018). The age-based model  
876 was exclusively used to statistically assess parameter age trajectories because  
877 individual parameters would be biased by the inclusion of age in the model.

878 In the age-based model, each parameter  $\theta$  of each participant  $j$  was sam-  
879 pled from a Normal distribution around an age-based regression line (Fig.  
880 3B):

$$\theta_j \sim Normal(\mu = \theta_{int} + age \times \theta_{lin} + age^2 \times \theta_{qua}, \sigma = \theta_{sd})$$

881 Each parameter’s intercept  $\theta_{int}$ , linear change with age  $\theta_{lin}$ , quadratic  
882 change with age  $\theta_{qua}$ , and standard deviation  $\theta_{sd}$  were sampled from prior  
883 distributions of the form specified in suppl. Table 5.

#### 884 4.5.4. Correlations between Model Parameters (Fig. 5B)

885 We used Spearman correlation because parameters followed different, not  
886 necessarily normal, distributions. Employing Pearson correlation led to sim-  
887 ilar results. p-values were corrected for multiple comparisons using the Bon-  
888 ferroni method.

889 *4.5.5. Principal Component Analysis (PCA)*

890 To extract general cognitive components from model parameters, we ran  
891 a PCA on all fitted parameters (8 per participant). PCA can be understood  
892 as a method that rotates the initial coordinate system of a dataset (in our  
893 case, 8 axes corresponding to the 8 parameters), such that the first axis is  
894 aligned with the dimension of largest variation in the dataset (first princi-  
895 ple component; PC1), the second axis with the dimension of second-largest  
896 variance (PC2), while being orthogonal to the first, and so on. In this way,  
897 all resulting PCs are orthogonal to each other, and explain subsequently less  
898 variance in the original dataset. We conducted a PCA after centering and  
899 scaling (z-scoring) the data, using R (RCoreTeam, 2016).

900 To assess PC age effects, we ran similar regression models as for behavioral  
901 measures, predicting PCs from z-scored age (linear), z-scored age (quadratic),  
902 and sex. When significant, effects were noted in Fig. 5E. For PC2 and PC4,  
903 we also conducted post-hoc t-tests, correcting for multiple comparison using  
904 the Bonferroni method (suppl. Table 15).

905 **5. Acknowledgments**

906 Numerous people contributed to this research: Amy Zou, Lance Kriegs-  
907 feld, Celia Ford, Jennifer Pfeifer, Megan Johnson, Gautam Agarwal, Liyu  
908 Xia, Vy Pham, Rachel Arsenault, Josephine Christon, Shoshana Edelman,  
909 Lucy Eletel, Neta Gotlieb, Haley Keglovits, Julie Liu, Justin Morillo, Nithya  
910 Rajakumar, Nick Spence, Tanya Smith, Benjamin Tang, Talia Welte, and  
911 Lucy Whitmore. We are also grateful to our participants and their families.  
912 The work was funded by National Science Foundation SL-CN grant 1640885  
913 to RD, AGECE, and LW.

914 **References**

- 915 Adleman, N., Kayser, R., Dickstein, D., Blair, R., Pine, D., & Leibenluft,  
916 E. (2011). Neural Correlates of Reversal Learning in Severe Mood  
917 Dysregulation and Pediatric Bipolar Disorder. *Journal of the Amer-  
918 ican Academy of Child and Adolescent Psychiatry*, 50, 1173–1185.e2.  
919 <https://doi.org/10.1016/j.jaac.2011.07.011>
- 920 Albert, D., Chein, J., & Steinberg, L. (2013). The Teenage Brain: Peer Influ-  
921 ences on Adolescent Decision Making. *Current Directions in Psycho-  
922 logical Science*, 22(2), 114–120. <https://doi.org/10.1177/0963721412471347>

- 923 Bartolo, R., & Averbeck, B. B. (2020). Prefrontal Cortex Predicts State  
924 Switches during Reversal Learning. *Neuron*, *106*(6), 1044–1054.e4.  
925 <https://doi.org/10.1016/j.neuron.2020.03.024>
- 926 Bates, D., Mächler, M., Bolker, B., & Walker, S. (2015). Fitting Linear  
927 Mixed-Effects Models Using lme4. *Journal of Statistical Software*,  
928 *67*(1), 1–48. <https://doi.org/10.18637/jss.v067.i01>
- 929 Bernardo, J. M., & Smith, A. F. M. (2009). *Bayesian Theory* [Google-Books-  
930 ID: 11nSgIcd7xQC]. John Wiley & Sons.
- 931 Blakemore, S.-J., Burnett, S., & Dahl, R. E. (2010). The Role of Puberty  
932 in the Developing Adolescent Brain. *Human Brain Mapping*, *31*(6),  
933 926–933. <https://doi.org/10.1002/hbm.21052>
- 934 Blohm, G., Kording, K. P., & Schrater, P. R. (2020). A How-to-Model Guide  
935 for Neuroscience [Publisher: Society for Neuroscience Section: Re-  
936 search Article: Methods/New Tools]. *eNeuro*, *7*(1). <https://doi.org/10.1523/ENEURO.0352-19.2019>
- 937
- 938 Boehm, U., Marsman, M., Matzke, D., & Wagenmakers, E.-J. (2018). On  
939 the importance of avoiding shortcuts in applying cognitive models  
940 to hierarchical data. *Behavior Research Methods*, *50*(4), 1614–1631.  
941 <https://doi.org/10.3758/s13428-018-1054-3>
- 942 Boehme, R., Lorenz, R. C., Gleich, T., Romund, L., Pelz, P., Golde, S., Flem-  
943 ming, E., Wold, A., Deserno, L., Behr, J., Raufelder, D., Heinz, A.,  
944 & Beck, A. (2017). Reversal learning strategy in adolescence is asso-  
945 ciated with prefrontal cortex activation. *European Journal of Neuro-  
946 science*, *45*(1), 129–137. <https://doi.org/10.1111/ejn.13401>
- 947 Boorman, E. D., Behrens, T. E., & Rushworth, M. F. (2011). Counterfactual  
948 Choice and Learning in a Neural Network Centered on Human Lateral  
949 Frontopolar Cortex (M. L. Platt, Ed.). *PLoS Biology*, *9*(6), e1001093.  
950 <https://doi.org/10.1371/journal.pbio.1001093>
- 951 Braams, B. R., Duijvenvoorde, A. C. K. v., Peper, J. S., & Crone, E. A.  
952 (2015). Longitudinal Changes in Adolescent Risk-Taking: A Compre-  
953 hensive Study of Neural Responses to Rewards, Pubertal Develop-  
954 ment, and Risk-Taking Behavior. *Journal of Neuroscience*, *35*(18),  
955 7226–7238. <https://doi.org/10.1523/JNEUROSCI.4764-14.2015>
- 956 Brandner, P., Güroğlu, B., van de Groep, S., Spaans, J. P., & Crone, E. A.  
957 (2021). Happy for Us not Them: Differences in neural activation in a  
958 vicarious reward task between family and strangers during adolescent  
959 development. *Developmental Cognitive Neuroscience*, 100985. <https://doi.org/10.1016/j.dcn.2021.100985>
- 960



- 961 Bromberg-Martin, E. S., Matsumoto, M., Hong, S., & Hikosaka, O. (2010). A  
962 Pallidus-Habenula-Dopamine Pathway Signals Inferred Stimulus Val-  
963 ues [Publisher: American Physiological Society]. *Journal of Neuro-*  
964 *physiology*, *104*(2), 1068–1076. <https://doi.org/10.1152/jn.00158.2010>
- 965 Casey, B. J., Jones, R. M., & Hare, T. A. (2008). The Adolescent Brain. *An-*  
966 *nals of the New York Academy of Sciences*, *1124*(1), 111–126. <https://doi.org/10.1196/annals.1440.010>
- 967
- 968 Cauffman, E., Shulman, E. P., Steinberg, L., Claus, E., Banich, M. T., Gra-  
969 ham, S., & Woolard, J. (2010). Age differences in affective decision  
970 making as indexed by performance on the Iowa Gambling Task. [Pub-  
971 lisher: US: American Psychological Association]. *Developmental Psy-*  
972 *chology*, *46*(1), 193. <https://doi.org/10.1037/a0016128>
- 973 Cazé, R. D., & van der Meer, M. A. A. (2013). Adaptive properties of dif-  
974 ferential learning rates for positive and negative outcomes. *Biological*  
975 *Cybernetics*, *107*(6), 711–719. [https://doi.org/10.1007/s00422-013-](https://doi.org/10.1007/s00422-013-0571-5)  
976 [0571-5](https://doi.org/10.1007/s00422-013-0571-5)
- 977 Chase, H. W., Swainson, R., Durham, L., Benham, L., & Cools, R. (2010).  
978 Feedback-related Negativity Codes Prediction Error but Not Behav-  
979 ioral Adjustment during Probabilistic Reversal Learning. *Journal of*  
980 *Cognitive Neuroscience*, *23*(4), 936–946. [https://doi.org/10.1162/](https://doi.org/10.1162/jocn.2010.21456)  
981 [jocn.2010.21456](https://doi.org/10.1162/jocn.2010.21456)
- 982 Christakou, A., Gershman, S. J., Niv, Y., Simmons, A., Brammer, M., &  
983 Rubia, K. (2013). Neural and psychological maturation of decision-  
984 making in adolescence and young adulthood. *Journal of Cognitive*  
985 *Neuroscience*, *25*(11), 1807–1823. [https://doi.org/10.1162/jocn\\_a-](https://doi.org/10.1162/jocn_a.00447)  
986 [00447](https://doi.org/10.1162/jocn_a.00447)
- 987 Clark, L., Cools, R., & Robbins, T. W. (2004). The neuropsychology of ven-  
988 tral prefrontal cortex: Decision-making and reversal learning. *Brain*  
989 *and Cognition*, *55*(1), 41–53. [https://doi.org/10.1016/S0278-2626\(03\)](https://doi.org/10.1016/S0278-2626(03)00284-7)  
990 [00284-7](https://doi.org/10.1016/S0278-2626(03)00284-7)
- 991 Costa, V. D., Tran, V. L., Turchi, J., & Averbeck, B. B. (2015). Reversal  
992 Learning and Dopamine: A Bayesian Perspective. *Journal of Neuro-*  
993 *science*, *35*(6), 2407–2416. [https://doi.org/10.1523/JNEUROSCI.](https://doi.org/10.1523/JNEUROSCI.1989-14.2015)  
994 [1989-14.2015](https://doi.org/10.1523/JNEUROSCI.1989-14.2015)
- 995 Dabney, W., Kurth-Nelson, Z., Uchida, N., Starkweather, C. K., Hassabis, D.,  
996 Munos, R., & Botvinick, M. (2020). A distributional code for value in  
997 dopamine-based reinforcement learning. *Nature*, *577*(7792), 671–675.  
998 <https://doi.org/10.1038/s41586-019-1924-6>

- 999 Dahl, R. E., Allen, N. B., Wilbrecht, L., & Suleiman, A. B. (2018). Impor-  
1000 tance of investing in adolescence from a developmental science per-  
1001 spective. *Nature*, *554*(7693), 441–450. [https://doi.org/10.1038/](https://doi.org/10.1038/nature25770)  
1002 [nature25770](https://doi.org/10.1038/nature25770)
- 1003 Davidow, J. Y., Foerde, K., Galvan, A., & Shohamy, D. (2016). An Up-  
1004 side to Reward Sensitivity: The Hippocampus Supports Enhanced  
1005 Reinforcement Learning in Adolescence. *Neuron*, *92*(1), 93–99. <https://doi.org/10.1016/j.neuron.2016.08.031>
- 1006
- 1007 Decker, J. H., Otto, A. R., Daw, N. D., & Hartley, C. A. (2016). From  
1008 Creatures of Habit to Goal-Directed Learners. *Psychological Science*,  
1009 *27*(6), 848–858. <https://doi.org/10.1177/0956797616639301>
- 1010 Delevich, K., Piekarski, D., & Wilbrecht, L. (2019). Neuroscience: Sex Hor-  
1011 mones at Work in the Neocortex. *Current Biology*, *29*(4), R122–R125.  
1012 <https://doi.org/10.1016/j.cub.2019.01.013>
- 1013 Delevich, K., Thomas, A. W., & Wilbrecht, L. (2018). Adolescence and “late  
1014 Blooming”■synapses of the Prefrontal Cortex. *Cold Spring Harbor*  
1015 *Symposia on Quantitative Biology*, *83*, 37–43. [https://doi.org/10.](https://doi.org/10.1101/sqb.2018.83.037507)  
1016 [1101/sqb.2018.83.037507](https://doi.org/10.1101/sqb.2018.83.037507)
- 1017 DePasque, S., & Galván, A. (2017). Frontostriatal development and prob-  
1018 abilistic reinforcement learning during adolescence. *Neurobiology of*  
1019 *Learning and Memory*, *143*, 1–7. [https://doi.org/10.1016/j.nlm.2017.](https://doi.org/10.1016/j.nlm.2017.04.009)  
1020 [04.009](https://doi.org/10.1016/j.nlm.2017.04.009)
- 1021 Dickstein, D. P., Finger, E. C., Brotman, M. A., Rich, B. A., Pine, D. S.,  
1022 Blair, J. R., & Leibenluft, E. (2010). Impaired probabilistic rever-  
1023 sal learning in youths with mood and anxiety disorders. *Psychological*  
1024 *Medicine*, *40*(7), 1089–1100. <https://doi.org/10.1017/S0033291709991462>
- 1025 Dickstein, D. P., Finger, E. C., Skup, M., Pine, D. S., Blair, J. R., & Leiben-  
1026 luft, E. (2010). Altered neural function in pediatric bipolar disorder  
1027 during reversal learning. *Bipolar Disorders*, *12*(7), 707–719. <https://doi.org/10.1111/j.1399-5618.2010.00863.x>
- 1028
- 1029 Drzewiecki, C. M., Willing, J., & Juraska, J. M. (2016). Synaptic number  
1030 changes in the medial prefrontal cortex across adolescence in male  
1031 and female rats: A role for pubertal onset. *Synapse (New York, N.Y.)*,  
1032 *70*(9), 361–368. <https://doi.org/10.1002/syn.21909>
- 1033 Eckstein, M. K., Master, S. L., Xia, L., Dahl, R. E., Wilbrecht, L., & Collins,  
1034 A. G. E. (2021). Learning Rates Are Not All the Same: The Interpre-  
1035 tation of Computational Model Parameters Depends on the Context  
1036 [Publisher: Cold Spring Harbor Laboratory Section: New Results].

- 1037 *bioRxiv*, 2021.05.28.446162. [https://doi.org/10.1101/2021.05.28.](https://doi.org/10.1101/2021.05.28.446162)  
1038 446162
- 1039 Eckstein, M. K., Wilbrecht, L., & Collins, A. G. (2021). What do reinforcement  
1040 learning models measure? Interpreting model parameters in cognition and neuroscience. *Current Opinion in Behavioral Sciences*, *41*,  
1041 128–137. <https://doi.org/10.1016/j.cobeha.2021.06.004>
- 1042 Finger, E. C., Marsh, A. A., Mitchell, D. G., Reid, M. E., Sims, C., Budhani, S., Kosson, D. S., Chen, G., Towbin, K. E., Leibenluft, E., Pine, D. S., & Blair, J. R. (2008). Abnormal Ventromedial Prefrontal Cortex Function in Children With Psychopathic Traits During Reversal Learning. *Archives of General Psychiatry*, *65*(5), 586–594. <https://doi.org/10.1001/archpsyc.65.5.586>
- 1043 Frank, M. J., & Claus, E. D. (2006). Anatomy of a decision: Striato-orbitofrontal  
1044 interactions in reinforcement learning, decision making, and reversal. *Psychological Review*, *113*(2), 300–326. [https://doi.org/10.1037/](https://doi.org/10.1037/0033-295X.113.2.300)  
1045 0033-295X.113.2.300
- 1046 Frank, M. J., Seeberger, L. C., & O'Reilly, R. C. (2004). By Carrot or by  
1047 Stick: Cognitive Reinforcement Learning in Parkinsonism. *Science*,  
1048 *306*(5703), 1940–1943. <https://doi.org/10.1126/science.1102941>
- 1049 Frankenhuis, W. E., & Walasek, N. (2020). Modeling the evolution of sensitive  
1050 periods. *Developmental Cognitive Neuroscience*, *41*, 100715. <https://doi.org/10.1016/j.dcn.2019.100715>
- 1051 Fuhs, M. C., & Touretzky, D. S. (2007). Context Learning in the Rodent  
1052 Hippocampus. *Neural Computation*, *19*(12), 3173–3215. <https://doi.org/10.1162/neco.2007.19.12.3173>
- 1053 Galvan, A., Hare, T. A., Parra, C. E., Penn, J., Voss, H., Glover, G., &  
1054 Casey, B. J. (2006). Earlier Development of the Accumbens Relative to Orbitofrontal Cortex Might Underlie Risk-Taking Behavior  
1055 in Adolescents. *Journal of Neuroscience*, *26*(25), 6885–6892. <https://doi.org/10.1523/JNEUROSCI.1062-06.2006>
- 1056 Gershman, S. J., & Uchida, N. (2019). Believing in dopamine [Number: 11  
1057 Publisher: Nature Publishing Group]. *Nature Reviews Neuroscience*,  
1058 *20*(11), 703–714. <https://doi.org/10.1038/s41583-019-0220-7>
- 1059 Giedd, J. N., Blumenthal, J., Jeffries, N. O., Castellanos, F. X., Liu, H.,  
1060 Zijdenbos, A., Paus, T., Evans, A. C., & Rapoport, J. L. (1999).  
1061 Brain development during childhood and adolescence: A longitudinal  
1062 MRI study. *Nature Neuroscience*, *2*(10), 861–863. [https://doi.org/](https://doi.org/10.1038/13158)  
1063 10.1038/13158  
1064

- 1075 Gläscher, J., Hampton, A. N., & O'Doherty, J. P. (2009). Determining a  
1076 role for ventromedial prefrontal cortex in encoding action-based value  
1077 signals during reward-related decision making. *Cerebral Cortex (New*  
1078 *York, N.Y.: 1991)*, 19(2), 483–495. [https://doi.org/10.1093/cercor/](https://doi.org/10.1093/cercor/bhn098)  
1079 [bhn098](https://doi.org/10.1093/cercor/bhn098)
- 1080 Gopnik, A., O'Grady, S., Lucas, C. G., Griffiths, T. L., Wente, A., Bridgers,  
1081 S., Aboody, R., Fung, H., & Dahl, R. E. (2017). Changes in cogni-  
1082 tive flexibility and hypothesis search across human life history from  
1083 childhood to adolescence to adulthood. *Proceedings of the National*  
1084 *Academy of Sciences*, 114(30), 7892–7899. [https://doi.org/10.1073/](https://doi.org/10.1073/pnas.1700811114)  
1085 [pnas.1700811114](https://doi.org/10.1073/pnas.1700811114)
- 1086 Gracia-Tabuenca, Z., Moreno, M. B., Barrios, F. A., & Alcauter, S. (2021).  
1087 Development of the brain functional connectome follows puberty-  
1088 dependent nonlinear trajectories. *NeuroImage*, 229, 117769. <https://doi.org/10.1016/j.neuroimage.2021.117769>  
1089 <https://doi.org/10.1016/j.neuroimage.2021.117769>
- 1090 Guskjolen, A., Josselyn, S. A., & Frankland, P. W. (2017). Age-dependent  
1091 changes in spatial memory retention and flexibility in mice. *Neurobi-*  
1092 *ology of Learning and Memory*, 143, 59–66. [https://doi.org/10.1016/](https://doi.org/10.1016/j.nlm.2016.12.006)  
1093 [j.nlm.2016.12.006](https://doi.org/10.1016/j.nlm.2016.12.006)
- 1094 Hamilton, D. A., & Brigman, J. L. (2015). Behavioral flexibility in rats and  
1095 mice: Contributions of distinct frontocortical regions. *Genes, brain,*  
1096 *and behavior*, 14(1), 4–21. <https://doi.org/10.1111/gbb.12191>
- 1097 Harada, T. (2020). Learning From Success or Failure? – Positivity Biases  
1098 Revisited. *Frontiers in Psychology*, 11. [https://doi.org/10.3389/](https://doi.org/10.3389/fpsyg.2020.01627)  
1099 [fpsyg.2020.01627](https://doi.org/10.3389/fpsyg.2020.01627)
- 1100 Harden, K. P., & Tucker-Drob, E. M. (2011). Individual differences in the  
1101 development of sensation seeking and impulsivity during adolescence:  
1102 Further evidence for a dual systems model. *Developmental Psychology*,  
1103 47(3), 739–746. <https://doi.org/10.1037/a0023279>
- 1104 Harms, M. B., Bowen, K. E. S., Hanson, J. L., & Pollak, S. D. (2018). In-  
1105 strumental learning and cognitive flexibility processes are impaired in  
1106 children exposed to early life stress. *Developmental Science*, 21(4),  
1107 e12596. <https://doi.org/10.1111/desc.12596>
- 1108 Hauser, T. U., Iannaccone, R., Ball, J., Mathys, C., Brandeis, D., Walitza,  
1109 S., & Brem, S. (2014). Role of the Medial Prefrontal Cortex in Im-  
1110 paired Decision Making in Juvenile Attention-Deficit/Hyperactivity  
1111 Disorder. *JAMA Psychiatry*, 71(10), 1165. [https://doi.org/10.1001/](https://doi.org/10.1001/jamapsychiatry.2014.1093)  
1112 [jamapsychiatry.2014.1093](https://doi.org/10.1001/jamapsychiatry.2014.1093)

- 1113 Hauser, T. U., Iannaccone, R., Walitza, S., Brandeis, D., & Brem, S. (2015).  
1114 Cognitive flexibility in adolescence: Neural and behavioral mecha-  
1115 nisms of reward prediction error processing in adaptive decision mak-  
1116 ing during development. *NeuroImage*, *104*, 347–354. [https://doi.org/](https://doi.org/10.1016/j.neuroimage.2014.09.018)  
1117 [10.1016/j.neuroimage.2014.09.018](https://doi.org/10.1016/j.neuroimage.2014.09.018)
- 1118 Heathcote, A., Brown, S. D., & Wagenmakers, E.-J. (2015). An Introduc-  
1119 tion to Good Practices in Cognitive Modeling (B. U. Forstmann &  
1120 E.-J. Wagenmakers, Eds.). In B. U. Forstmann & E.-J. Wagenmakers  
1121 (Eds.), *An Introduction to Model-Based Cognitive Neuroscience*. New  
1122 York, NY, Springer. [https://doi.org/10.1007/978-1-4939-2236-9\\_2](https://doi.org/10.1007/978-1-4939-2236-9_2)
- 1123 Hildebrandt, T., Schulz, K., Schiller, D., Heywood, A., Goodman, W., &  
1124 Sysko, R. (2018). Evidence of prefrontal hyperactivation to food-cue  
1125 reversal learning in adolescents with anorexia nervosa. *Behaviour Re-*  
1126 *search and Therapy*, *111*, 36–43. [https://doi.org/10.1016/j.brat.2018.](https://doi.org/10.1016/j.brat.2018.08.006)  
1127 [08.006](https://doi.org/10.1016/j.brat.2018.08.006)
- 1128 Izquierdo, A., Brigman, J. L., Radke, A. K., Rudebeck, P. H., & Holmes, A.  
1129 (2017). The neural basis of reversal learning: An updated perspective.  
1130 *Neuroscience*, *345*, 12–26. [https://doi.org/10.1016/j.neuroscience.](https://doi.org/10.1016/j.neuroscience.2016.03.021)  
1131 [2016.03.021](https://doi.org/10.1016/j.neuroscience.2016.03.021)
- 1132 Izquierdo, A., & Jentsch, J. D. (2012). Reversal learning as a measure of im-  
1133 pulsive and compulsive behavior in addictions. *Psychopharmacology*,  
1134 *219*(2), 607–620. <https://doi.org/10.1007/s00213-011-2579-7>
- 1135 Jacobs, A. M., & Grainger, J. (1994). Models of visual word recognition: Sam-  
1136 pling the state of the art [Place: US Publisher: American Psychological  
1137 Association]. *Journal of Experimental Psychology: Human Perception*  
1138 *and Performance*, *20*(6), 1311–1334. [https://doi.org/10.1037/0096-](https://doi.org/10.1037/0096-1523.20.6.1311)  
1139 [1523.20.6.1311](https://doi.org/10.1037/0096-1523.20.6.1311)
- 1140 Javadi, A. H., Schmidt, D. H. K., & Smolka, M. N. (2014). Adolescents adapt  
1141 more slowly than adults to varying reward contingencies. *Journal of*  
1142 *Cognitive Neuroscience*, *26*(12), 2670–2681. [https://doi.org/10.1162/](https://doi.org/10.1162/jocn.a.00677)  
1143 [jocn.a.00677](https://doi.org/10.1162/jocn.a.00677)
- 1144 Johnson, C., & Wilbrecht, L. (2011). Juvenile mice show greater flexibility in  
1145 multiple choice reversal learning than adults. *Developmental Cognitive*  
1146 *Neuroscience*, *1*(4), 540–551. [https://doi.org/10.1016/j.dcn.2011.05.](https://doi.org/10.1016/j.dcn.2011.05.008)  
1147 [008](https://doi.org/10.1016/j.dcn.2011.05.008)
- 1148 Juraska, J. M., & Willing, J. (2017). Pubertal onset as a critical transition  
1149 for neural development and cognition. *Brain Research*, *1654* (Pt B),  
1150 87–94. <https://doi.org/10.1016/j.brainres.2016.04.012>

- 1151 Katahira, K. (2016). How hierarchical models improve point estimates of  
1152 model parameters at the individual level. *Journal of Mathematical*  
1153 *Psychology*, *73*, 37–58. <https://doi.org/10.1016/j.jmp.2016.03.007>
- 1154 Kehagia, A. A., Murray, G. K., & Robbins, T. W. (2010). Learning and  
1155 cognitive flexibility: Frontostriatal function and monoaminergic mod-  
1156 ulation. *Current Opinion in Neurobiology*, *20*(2), 199–204. <https://doi.org/10.1016/j.conb.2010.01.007>
- 1157
- 1158 Kleibeuker, S. W., Dreu, C. K. W. D., & Crone, E. A. (2013). The develop-  
1159 ment of creative cognition across adolescence: Distinct trajectories for  
1160 insight and divergent thinking. *Developmental Science*, *16*(1), 2–12.  
1161 <https://doi.org/10.1111/j.1467-7687.2012.01176.x>
- 1162 Kording, K. P., Blohm, G., Schrater, P., & Kay, K. (2020). Appreciating the  
1163 variety of goals in computational neuroscience [Publisher: The neu-  
1164 rons, behavior, data analysis and theory collective]. *Neurons, Behav-*  
1165 *ior, Data analysis, and Theory*, *3*(6), 1–12. Retrieved April 23, 2021,  
1166 from [https://nbd.scholasticahq.com/article/16723-appreciating-the-](https://nbd.scholasticahq.com/article/16723-appreciating-the-variety-of-goals-in-computational-neuroscience)  
1167 [variety-of-goals-in-computational-neuroscience](https://nbd.scholasticahq.com/article/16723-appreciating-the-variety-of-goals-in-computational-neuroscience)
- 1168 Kraemer, H. C., Yesavage, J. A., Taylor, J. L., & Kupfer, D. (2000). How can  
1169 we learn about developmental processes from cross-sectional studies,  
1170 or can we? *The American Journal of Psychiatry*, *157*(2), 163–171.  
1171 <https://doi.org/10.1176/appi.ajp.157.2.163>
- 1172 Larsen, B., & Luna, B. (2018). Adolescence as a neurobiological critical pe-  
1173 riod for the development of higher-order cognition. *Neuroscience &*  
1174 *Biobehavioral Reviews*, *94*, 179–195. [https://doi.org/10.1016/j.](https://doi.org/10.1016/j.neubiorev.2018.09.005)  
1175 [neubiorev.2018.09.005](https://doi.org/10.1016/j.neubiorev.2018.09.005)
- 1176 Laube, C., Lorenz, R., & van den Bos, W. (2020). Pubertal testosterone  
1177 correlates with adolescent impatience and dorsal striatal activity. *De-*  
1178 *velopmental Cognitive Neuroscience*, *42*, 100749. [https://doi.org/10.](https://doi.org/10.1016/j.dcn.2019.100749)  
1179 [1016/j.dcn.2019.100749](https://doi.org/10.1016/j.dcn.2019.100749)
- 1180 Laube, C., van den Bos, W., & Fandakova, Y. (2020). The relationship be-  
1181 tween pubertal hormones and brain plasticity: Implications for cog-  
1182 nitive training in adolescence. *Developmental Cognitive Neuroscience*,  
1183 100753. <https://doi.org/10.1016/j.dcn.2020.100753>
- 1184 Lee, D., Seo, H., & Jung, M. W. (2012). Neural Basis of Reinforcement  
1185 Learning and Decision Making. *Annual review of neuroscience*, *35*,  
1186 287–308. <https://doi.org/10.1146/annurev-neuro-062111-150512>

- 1187 Lee, M. D. (2011). How cognitive modeling can benefit from hierarchical  
1188 Bayesian models. *Journal of Mathematical Psychology*, *55*(1), 1–7.  
1189 <https://doi.org/10.1016/j.jmp.2010.08.013>
- 1190 Lefebvre, G., Lebreton, M., Meyniel, F., Bourgeois-Gironde, S., & Palminteri,  
1191 S. (2017). Behavioural and neural characterization of optimistic re-  
1192 inforcement learning. *Nature Human Behaviour*, *1*(4), 0067. [https:](https://doi.org/10.1038/s41562-017-0067)  
1193 [//doi.org/10.1038/s41562-017-0067](https://doi.org/10.1038/s41562-017-0067)
- 1194 Lloyd, A., McKay, R., Sebastian, C. L., & Balsters, J. H. (2020). Are ado-  
1195 lescents more optimal decision-makers in novel environments? Ex-  
1196 amining the benefits of heightened exploration in a patch foraging  
1197 paradigm [eprint: <https://onlinelibrary.wiley.com/doi/pdf/10.1111/desc.13075>].  
1198 *Developmental Science*, *n/a*(n/a), e13075. [https://doi.org/https:](https://doi.org/https://doi.org/10.1111/desc.13075)  
1199 [//doi.org/10.1111/desc.13075](https://doi.org/10.1111/desc.13075)
- 1200 Lourenco, F., & Casey, B. (2013). Adjusting behavior to changing environ-  
1201 mental demands with development. *Neuroscience & Biobehavioral Re-*  
1202 *views*, *37*(9), 2233–2242. [https://doi.org/10.1016/j.neubiorev.2013.](https://doi.org/10.1016/j.neubiorev.2013.03.003)  
1203 [03.003](https://doi.org/10.1016/j.neubiorev.2013.03.003)
- 1204 Master, S. L., Eckstein, M. K., Gotlieb, N., Dahl, R., Wilbrecht, L., & Collins,  
1205 A. G. E. (2020). Disentangling the systems contributing to changes in  
1206 learning during adolescence. *Developmental Cognitive Neuroscience*,  
1207 *41*, 100732. <https://doi.org/10.1016/j.dcn.2019.100732>
- 1208 Metha, J. A., Brian, M. L., Oberrauch, S., Barnes, S. A., Featherby, T. J.,  
1209 Bossaerts, P., Murawski, C., Hoyer, D., & Jacobson, L. H. (2020).  
1210 Separating Probability and Reversal Learning in a Novel Probabilistic  
1211 Reversal Learning Task for Mice [Publisher: Frontiers]. *Frontiers in*  
1212 *Behavioral Neuroscience*, *13*. [https://doi.org/10.3389/fnbeh.2019.](https://doi.org/10.3389/fnbeh.2019.00270)  
1213 [00270](https://doi.org/10.3389/fnbeh.2019.00270)
- 1214 Minto de Sousa, N., Gil, M. S. C. d. A., & McIlvane, W. J. (2015). Discrim-  
1215 ination and Reversal Learning by Toddlers Aged 15-23 Months. *The*  
1216 *Psychological Record*, *65*(1), 41–47. [https://doi.org/10.1007/s40732-](https://doi.org/10.1007/s40732-014-0084-1)  
1217 [014-0084-1](https://doi.org/10.1007/s40732-014-0084-1)
- 1218 Morris, L. S., Kundu, P., Dowell, N., Mechelmans, D. J., Favre, P., Irvine,  
1219 M. A., Robbins, T. W., Daw, N., Bullmore, E. T., Harrison, N. A.,  
1220 & Voon, V. (2016). Fronto-striatal organization: Defining functional  
1221 and microstructural substrates of behavioural flexibility. *Cortex*, *74*,  
1222 118–133. <https://doi.org/10.1016/j.cortex.2015.11.004>
- 1223 Mulder, J., & Wagenmakers, E.-J. (2016). Editors’ introduction to the special  
1224 issue “Bayes factors for testing hypotheses in psychological research:

- 1225 Practical relevance and new developments". *Journal of Mathematical*  
1226 *Psychology*, 72, 1–5. <https://doi.org/10.1016/j.jmp.2016.01.002>
- 1227 Nassar, M. R., Rumsey, K. M., Wilson, R. C., Parikh, K., Heasley, B., & Gold,  
1228 J. I. (2012). Rational regulation of learning dynamics by pupil-linked  
1229 arousal systems [Number: 7 Publisher: Nature Publishing Group]. *Nature*  
1230 *Neuroscience*, 15(7), 1040–1046. [https://doi.org/10.1038/nn.](https://doi.org/10.1038/nn.3130)  
1231 3130
- 1232 Natterson-Horowitz, D. B., & Bowers, K. (2019). *Wildhood: The Astound-*  
1233 *ing Connections between Human and Animal Adolescents*. New York,  
1234 Scribner.
- 1235 Navarro, D. J. (2019). Between the Devil and the Deep Blue Sea: Tensions  
1236 Between Scientific Judgement and Statistical Model Selection. *Com-*  
1237 *putational Brain & Behavior*, 2(1), 28–34. [https://doi.org/10.1007/](https://doi.org/10.1007/s42113-018-0019-z)  
1238 s42113-018-0019-z
- 1239 Niv, Y. (2009). Reinforcement learning in the brain. *Journal of Mathematical*  
1240 *Psychology*, 53(3), 139–154.
- 1241 Nussenbaum, K., & Hartley, C. A. (2019). Reinforcement learning across  
1242 development: What insights can we draw from a decade of research?  
1243 *Developmental Cognitive Neuroscience*, 40, 100733. [https://doi.org/](https://doi.org/10.1016/j.dcn.2019.100733)  
1244 10.1016/j.dcn.2019.100733
- 1245 O’Doherty, J. P., Lee, S. W., & McNamee, D. (2015). The structure of  
1246 reinforcement-learning mechanisms in the human brain. *Current Opin-*  
1247 *ion in Behavioral Sciences*, 1, 94–100. [https://doi.org/10.1016/j.](https://doi.org/10.1016/j.cobeha.2014.10.004)  
1248 cobeha.2014.10.004
- 1249 Op de Macks, Z. A., Bunge, S. A., Bell, O. N., Wilbrecht, L., Kriegsfeld,  
1250 L. J., Kayser, A. S., & Dahl, R. E. (2016). Risky decision-making in  
1251 adolescent girls: The role of pubertal hormones and reward circuitry.  
1252 *Psychoneuroendocrinology*, 74, 77–91. [https://doi.org/10.1016/j.](https://doi.org/10.1016/j.psyneuen.2016.08.013)  
1253 psyneuen.2016.08.013
- 1254 O’Reilly, J. X., Schüffelgen, U., Cuell, S. F., Behrens, T. E. J., Mars, R. B.,  
1255 & Rushworth, M. F. S. (2013). Dissociable effects of surprise and  
1256 model update in parietal and anterior cingulate cortex. *Proceedings*  
1257 *of the National Academy of Sciences of the United States of America*,  
1258 110(38), E3660–3669. <https://doi.org/10.1073/pnas.1305373110>
- 1259 Palminteri, S., Kilford, E. J., Coricelli, G., & Blakemore, S.-J. (2016). The  
1260 Computational Development of Reinforcement Learning during Ado-  
1261 lescence. *PLoS Computational Biology*, 12(6). [https://doi.org/10.](https://doi.org/10.1371/journal.pcbi.1004953)  
1262 1371/journal.pcbi.1004953



- 1263 Palminteri, S., Wyart, V., & Koechlin, E. (2017). The Importance of Fal-  
1264 sification in Computational Cognitive Modeling. *Trends in Cognitive*  
1265 *Sciences*, 21(6), 425–433. <https://doi.org/10.1016/j.tics.2017.03.011>
- 1266 Perfors, A., Tenenbaum, J. B., Griffiths, T. L., & Xu, F. (2011). A tutorial  
1267 introduction to Bayesian models of cognitive development, 61.
- 1268 Petersen, A. C., Crockett, L., Richards, M., & Boxer, A. (1988). A self-report  
1269 measure of pubertal status: Reliability, validity, and initial norms.  
1270 *Journal of Youth and Adolescence*, 17(2), 117–133. [https://doi.org/](https://doi.org/10.1007/BF01537962)  
1271 [10.1007/BF01537962](https://doi.org/10.1007/BF01537962)
- 1272 Peterson, D. A., Elliott, C., Song, D. D., Makeig, S., Sejnowski, T. J., &  
1273 Poizner, H. (2009). Probabilistic reversal learning is impaired in Parkin-  
1274 son’s disease. *Neuroscience*, 163(4), 1092–1101. [https://doi.org/10.](https://doi.org/10.1016/j.neuroscience.2009.07.033)  
1275 [1016/j.neuroscience.2009.07.033](https://doi.org/10.1016/j.neuroscience.2009.07.033)
- 1276 Piekarski, D. J., Boivin, J. R., & Wilbrecht, L. (2017). Ovarian Hormones Or-  
1277 ganize the Maturation of Inhibitory Neurotransmission in the Frontal  
1278 Cortex at Puberty Onset in Female Mice. *Current biology: CB*, 27(12),  
1279 1735–1745.e3. <https://doi.org/10.1016/j.cub.2017.05.027>
- 1280 Piekarski, D. J., Johnson, C. M., Boivin, J. R., Thomas, A. W., Lin, W. C.,  
1281 Delevich, K., M Galarce, E., & Wilbrecht, L. (2017). Does puberty  
1282 mark a transition in sensitive periods for plasticity in the associative  
1283 neocortex? *Brain Research*, 1654 (Pt B), 123–144. [https://doi.org/10.](https://doi.org/10.1016/j.brainres.2016.08.042)  
1284 [1016/j.brainres.2016.08.042](https://doi.org/10.1016/j.brainres.2016.08.042)
- 1285 Pitt, M. A., & Myung, I. J. (2002). When a good fit can be bad. *Trends in*  
1286 *Cognitive Sciences*, 6(10), 421–425. [https://doi.org/10.1016/S1364-](https://doi.org/10.1016/S1364-6613(02)01964-2)  
1287 [6613\(02\)01964-2](https://doi.org/10.1016/S1364-6613(02)01964-2)
- 1288 RCoreTeam. (2016). *R: A Language and Environment for Statistical Com-*  
1289 *puting*. Vienna, Austria, R Foundation for Statistical Computing.
- 1290 Romer, D., & Hennessy, M. (2007). A Biosocial-Affect Model of Adolescent  
1291 Sensation Seeking: The Role of Affect Evaluation and Peer-Group  
1292 Influence in Adolescent Drug Use. *Prevention Science*, 8(2), 89. [https:](https://doi.org/10.1007/s11121-007-0064-7)  
1293 [//doi.org/10.1007/s11121-007-0064-7](https://doi.org/10.1007/s11121-007-0064-7)
- 1294 Salvatier, J., Wiecki, T. V., & Fonnesbeck, C. (2016). Probabilistic program-  
1295 ming in Python using PyMC3. *PeerJ Computer Science*, 2, e55. [https:](https://doi.org/10.7717/peerj-cs.55)  
1296 [//doi.org/10.7717/peerj-cs.55](https://doi.org/10.7717/peerj-cs.55)
- 1297 Sarkka, S. (2013). *Bayesian Filtering and Smoothing*. Cambridge, Cambridge  
1298 University Press. <https://doi.org/10.1017/CBO9781139344203>
- 1299 Schlagenhaut, F., Huys, Q. J., Deserno, L., Rapp, M. A., Beck, A., Heinze,  
1300 H.-J., Dolan, R., & Heinz, A. (2014). Striatal dysfunction during re-

- 1301           versal learning in unmedicated schizophrenia patients. *Neuroimage*,  
1302           89(100), 171–180. <https://doi.org/10.1016/j.neuroimage.2013.11.034>
- 1303 Sercombe, H. (2014). Risk, adaptation and the functional teenage brain.  
1304           *Brain and Cognition*, 89, 61–69. [https://doi.org/10.1016/j.bandc.](https://doi.org/10.1016/j.bandc.2014.01.001)  
1305           2014.01.001
- 1306 Simon, N. W., Gregory, T. A., Wood, J., & Moghaddam, B. (2013). Differ-  
1307           ences in response initiation and behavioral flexibility between adoles-  
1308           cent and adult rats. *Behavioral Neuroscience*, 127(1), 23–32. <https://doi.org/10.1037/a0031328>
- 1309 Solway, A., & Botvinick, M. (2012). Goal-directed decision making as prob-  
1310           abilistic inference: A computational framework and potential neural  
1311           correlates. *Psychological Review*, 119(1), 120–154. [https://doi.org/](https://doi.org/10.1037/a0026435)  
1312           10.1037/a0026435
- 1313 Somerville, L. H., & Casey, B. (2010). Developmental neurobiology of cogni-  
1314           tive control and motivational systems. *Current Opinion in Neurobiol-*  
1315           *ogy*, 20(2), 236–241. <https://doi.org/10.1016/j.conb.2010.01.006>
- 1316 Somerville, L. H., Sasse, S. F., Garrad, M. C., Drysdale, A. T., Abi Akar, N.,  
1317           Insel, C., & Wilson, R. C. (2017). Charting the expansion of strategic  
1318           exploratory behavior during adolescence [Place: US Publisher: Amer-  
1319           ican Psychological Association]. *Journal of Experimental Psychology:*  
1320           *General*, 146(2), 155–164. <https://doi.org/10.1037/xge0000250>
- 1321 Sowell, E. R., Peterson, B. S., Thompson, P. M., Welcome, S. E., Henkenius,  
1322           A. L., & Toga, A. W. (2003). Mapping cortical change across the  
1323           human life span. *Nature Neuroscience*, 6(3), 309–315. [https://doi.](https://doi.org/10.1038/nm1008)  
1324           org/10.1038/nm1008
- 1325 Steinberg, L. (2005). Cognitive and affective development in adolescence.  
1326           *Trends in Cognitive Sciences*, 9(2), 69–74. [https://doi.org/10.1016/](https://doi.org/10.1016/j.tics.2004.12.005)  
1327           j.tics.2004.12.005
- 1328 Sugawara, M., & Katahira, K. (2021). Dissociation between asymmetric value  
1329           updating and perseverance in human reinforcement learning [Num-  
1330           ber: 1 Publisher: Nature Publishing Group]. *Scientific Reports*, 11(1),  
1331           3574. <https://doi.org/10.1038/s41598-020-80593-7>
- 1332 Sutton, R. S., & Barto, A. G. (2017). *Reinforcement Learning: An Introduc-*  
1333           *tion* (2nd ed.). Cambridge, MA; London, England, MIT Press.
- 1334 Tai, L.-H., Lee, A. M., Benavidez, N., Bonci, A., & Wilbrecht, L. (2012).  
1335           Transient stimulation of distinct subpopulations of striatal neurons  
1336           mimics changes in action value. *Nature Neuroscience*, 15(9), 1281–  
1337           1289. <https://doi.org/10.1038/nm.3188>
- 1338

- 1339 Toga, A. W., Thompson, P. M., & Sowell, E. R. (2006). Mapping brain  
1340 maturation. *Trends in neurosciences*, *29*(3), 148–159. <https://doi.org/10.1016/j.tins.2006.01.007>  
1341
- 1342 Uttal, W. R. (1990). On some two-way barriers between models and mecha-  
1343 nisms. *Perception & Psychophysics*, *48*(2), 188–203. <https://doi.org/10.3758/BF03207086>  
1344
- 1345 van den Bos, W., Bruckner, R., Nassar, M. R., Mata, R., & Eppinger, B.  
1346 (2017). Computational neuroscience across the lifespan: Promises and  
1347 pitfalls. *Developmental Cognitive Neuroscience*. <https://doi.org/10.1016/j.dcn.2017.09.008>  
1348
- 1349 van den Bos, W., Cohen, M. X., Kahnt, T., & Crone, E. A. (2012). Stria-  
1350 tum–Medial Prefrontal Cortex Connectivity Predicts Developmental  
1351 Changes in Reinforcement Learning. *Cerebral Cortex*, *22*(6), 1247–  
1352 1255. <https://doi.org/10.1093/cercor/bhr198>
- 1353 van den Bos, W., Guroglu, B., van den Bulk, B. G., Rombouts, S. A., &  
1354 Crone, E. A. (2009). Better than Expected or as Bad as You Thought?  
1355 The Neurocognitive Development of Probabilistic Feedback Process-  
1356 ing. *Frontiers in Human Neuroscience*, *3*. [https://doi.org/10.3389/](https://doi.org/10.3389/neuro.09.052.2009)  
1357 [neuro.09.052.2009](https://doi.org/10.3389/neuro.09.052.2009)
- 1358 van den Bos, W., & Hertwig, R. (2017). Adolescents display distinctive tol-  
1359 erance to ambiguity and to uncertainty during risky decision making  
1360 [Number: 1 Publisher: Nature Publishing Group]. *Scientific Reports*,  
1361 *7*(1), 40962. <https://doi.org/10.1038/srep40962>
- 1362 van der Schaaf, M. E., Warmerdam, E., Crone, E. A., & Cools, R. (2011).  
1363 Distinct linear and non-linear trajectories of reward and punishment  
1364 reversal learning during development: Relevance for dopamine’s role  
1365 in adolescent decision making. *Developmental Cognitive Neuroscience*,  
1366 *1*(4), 578–590. <https://doi.org/10.1016/j.dcn.2011.06.007>
- 1367 Watanabe, S. (2013). A Widely Applicable Bayesian Information Criterion.  
1368 *Journal of Machine Learning Research*, *14* (Mar), 867–897. Retrieved  
1369 October 30, 2019, from [http://www.jmlr.org/papers/v14/watanabe13a.](http://www.jmlr.org/papers/v14/watanabe13a.html)  
1370 [html](http://www.jmlr.org/papers/v14/watanabe13a.html)
- 1371 Webb, B. (2001). Can robots make good models of biological behaviour?  
1372 [Publisher: Cambridge University Press]. *Behavioral and Brain Sci-*  
1373 *ences*, *24*(6), 1033–1050. <https://doi.org/10.1017/S0140525X01000127>
- 1374 Wilson, R. C., & Collins, A. G. (2019). Ten simple rules for the computational  
1375 modeling of behavioral data (T. E. Behrens, Ed.) [Publisher: eLife

- 1376 Sciences Publications, Ltd]. *eLife*, 8, e49547. <https://doi.org/10.7554/eLife.49547>
- 1377
- 1378 Xia, L., Master, S., Eckstein, M., Wilbrecht, L., & Collins, A. G. E. (2020).  
1379 Learning under uncertainty changes during adolescence, In *Proceed-*  
1380 *ings of the Cognitive Science Society*.
- 1381 Yaple, Z. A., & Yu, R. (2019). Fractionating adaptive learning: A meta-  
1382 analysis of the reversal learning paradigm. *Neuroscience & Biobehav-*  
1383 *ioral Reviews*, 102, 85–94. <https://doi.org/10.1016/j.neubiorev.2019.04.006>
- 1384
- 1385 Yu, A. J., & Dayan, P. (2005). Uncertainty, Neuromodulation, and Attention.  
1386 *Neuron*, 46(4), 681–692. <https://doi.org/10.1016/j.neuron.2005.04.026>
- 1387

## 1388 **6. Supplemental Material**

### 1389 *6.1. Supplemental Introduction*

#### 1390 *6.1.1. Overview of Previous Reversal-Learning Studies in Adolescents*

1391 We know of three other groups that have investigated the development  
1392 of reversal learning before. Table 3 shows the methods used in these studies,  
1393 and Table 4 summarizes the main findings. It is of note that others have  
1394 investigated developing populations on reversal tasks as well, but either age  
1395 effects were not recorded (e.g., due to a focus on clinical questions; Adleman  
1396 et al., 2011; Boehme et al., 2017; Dickstein, Finger, Brotman, et al., 2010;  
1397 Dickstein, Finger, Skup, et al., 2010; Finger et al., 2008; Harms et al., 2018),  
1398 or participants were younger and studies did not include adolescents (e.g.,  
1399 Minto de Sousa et al., 2015).

### 1400 *6.2. Supplemental Methods*

1401 *Quantile Age Bins.* For some analyses, we split participants into quantiles  
1402 based on age. This data binning led to samples of adequate sizes for sum-  
1403 mary statistics, while re-balancing group sizes after participant exclusion (see  
1404 section 4.1). For participants below 18 years, quantiles were created by first  
1405 separating males and females. For each sex, we then determined the cut-off  
1406 ages that created the most balanced groups in terms of participant numbers,  
1407 and recombined males and females to ensure even proportions of males and  
1408 females in each age bin. For adult participants, we split the sample at 25  
1409 years of age.

#### 1410 *6.2.1. Comparing the Effectiveness of Hierarchical Bayesian Model Fitting 1411 versus Maximum-Likelihood Fitting on the Current Task*

1412 All model fits are relative: When model A fits data better than model B,  
1413 there is no guarantee that model A fits the data “well”. Both models could  
1414 fit the data poorly, with model A fitting just slightly better than model B.  
1415 To ensure that our models fit well, we therefore validated parameter fitting  
1416 and model comparison by first simulating and then recovering parameters  
1417 from each model (Palminteri et al., 2017; Wilson and Collins, 2019). An  
1418 identifiable model will recover the simulated parameters well during fitting,  
1419 whereas an unidentifiable model will not. We also compared the results  
1420 of maximum likelihood and hierarchical Bayesian model fitting using this  
1421 procedure.

Table 3: Overview of studies that have used reversal tasks in human adolescents and investigated age effects. This table details participant samples, task designs, and RL modeling methods.

| Study                       | Participant age                                                                             | Task                                                                                                                                                                | RL model                                                                             | RL model quality                                                                  |
|-----------------------------|---------------------------------------------------------------------------------------------|---------------------------------------------------------------------------------------------------------------------------------------------------------------------|--------------------------------------------------------------------------------------|-----------------------------------------------------------------------------------|
| Javadi et al., 2014         | 14-15 (n=260)<br>20-39 (n=29)                                                               | Select one stimulus on each trial<br>Correct: 70% reward, 30% punishment<br>Incorrect: 40% reward, 60% punishment<br>Reversal: 25% per trial after $\geq 4$ correct | Adaptive $\alpha$<br>(3 parameters)                                                  | No model comparison<br>No model validation                                        |
| Hauser et al., 2015         | 12-16 (n=19)<br>20-29 (n=17)                                                                | Select one stimulus on each trial<br>Correct: 80% reward, 20% punishment<br>Incorrect: 20% reward, 80% punishment<br>Reversal: 6-10 trials after 3 consec. correct  | [Positive vs negative] and<br>[factual vs count.-fact.] learn. rates                 | Model comparison (3 models)<br>No model validation                                |
| van der Schaaf et al., 2011 | 10-11 (n=15)<br>13-14 (n=15)<br>16-17 (n=15)<br>20-25 (n=16)                                | Predict outcome of highlighted stimulus<br>Correct: 100% reward, 0% punishment<br>Incorrect: 0% reward, 100% punishment<br>Reversal: after 4-6 consecutive correct  | No computational model                                                               |                                                                                   |
| Ours                        | 8-10 (n=41)<br>10-13 (n=46)<br>13-15 (n=45)<br>15-17 (n=47)<br>18-26 (n=57)<br>25-30 (n=55) | Select one stimulus on each trial<br>Correct: 75% reward, 25% punishment<br>Incorrect: 0% reward, 100% punishment<br>Reversal: After 7-15 rewards                   | [Positive vs negative] and<br>[factual vs count.-fact.] learn. rates;<br>persistence | Extensive model comparison<br>(7 RL & 16 BI models)<br>Extensive model validation |

Table 4: Overview of the results of the studies in suppl. Table 3. We focus on age differences in overall performance, the number of reversals (another performance measure), and RL model parameters. Note that differences between studies need to be interpreted carefully because task design, participant samples, and computational models differed between studies, as shown in suppl. Table 3.

| Study                       | Performance                                                                                                            | Number of reversals      | RL model results                                                                                                                                                                                                        |
|-----------------------------|------------------------------------------------------------------------------------------------------------------------|--------------------------|-------------------------------------------------------------------------------------------------------------------------------------------------------------------------------------------------------------------------|
| Javadi et al., 2014         | No age difference                                                                                                      | More in adults           | $\log(\gamma)$ lower in adolescents<br>Larger RPEs in adolescents after correct responses but negative feedback                                                                                                         |
| Hauser et al., 2015         | No age difference                                                                                                      | No age difference        | $\alpha_{-}$ <i>factual</i> higher in adolescents                                                                                                                                                                       |
| van der Schaaf et al., 2011 | Linear increase non-reversal trials (asymptote in adolescence)<br>Inverse U-shape reversal trials (max in adolescence) | Linear increase with age | No model                                                                                                                                                                                                                |
| Ours                        | Inverse U-shape asymptotic trials (max in mid-adolescence)<br>Inverse U-shape reversal trials (max in adolescence)     | NA                       | $p$ increases with age, asymptotes in late adolescence<br>$\beta$ increases with age, asymptotes in late adolescence<br>$\alpha_{-}$ U-shape, lowest in mid-adolescence<br>$\alpha_{+}$ step function, larger in adults |

1422 Figure 6A shows the well-established finding that hierarchical Bayesian  
1423 model fitting outperforms the maximum likelihood method (Katahira, 2016):  
1424 Both BF and RL model parameters were recovered well when using hierar-  
1425 chical Bayesian model fitting (age-free model), but not when using maximum  
1426 likelihood. Furthermore, hierarchical Bayesian model fitting led to more con-  
1427 sistent estimates of parameters  $\beta$  and  $p$  between both models (suppl. Fig.  
1428 6B), showing that this method was especially suited for our dual-model ap-  
1429 proach. These results lend credence to the superior fit that can be achieved  
1430 using Hierarchical Bayesian methods, and to the precision with which model  
1431 parameter can be estimated.



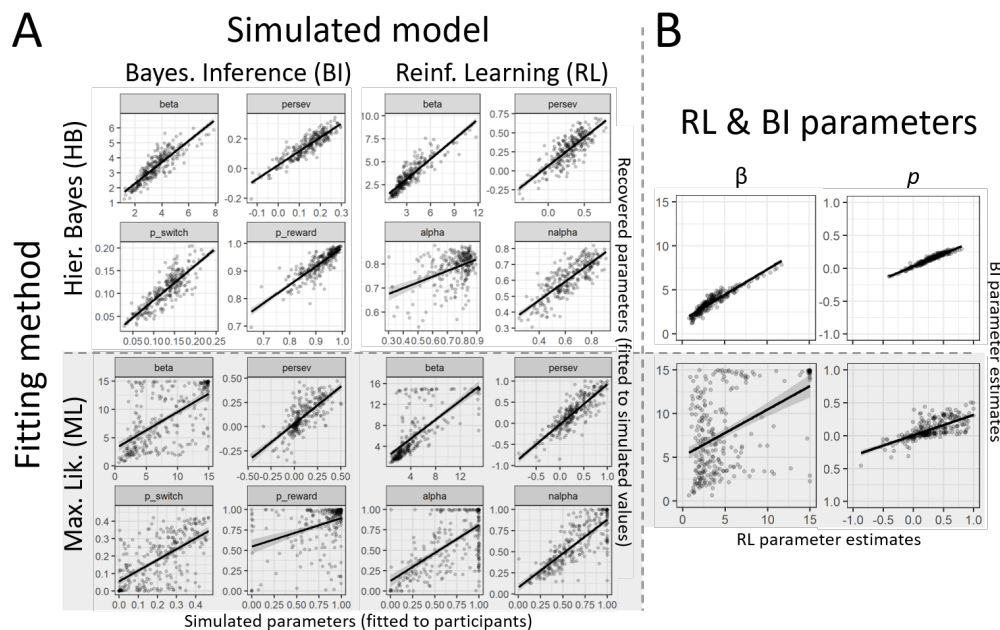

Figure 6: Model validation using hierarchical Bayesian model fitting (top, unshaded) and Maximum likelihood fitting (bottom, shaded). A) Simulate-and-recover procedure. The x-axes of all graphs show the parameter values of simulated datasets; the y-axes show the recovered parameters obtained by fitting these datasets using the same models. Recovered parameters should be as close to the simulated ones as possible, i.e., lie on the identity line. Black lines and shaded areas indicate best-fit regression lines. The left half presents simulate-and-recover results for the BI model, the right for the RL model. The top half shows the results of hierarchical Bayesian model fitting (our method), the bottom of the maximum likelihood method (standard). B) Consistency in the estimation of parameters  $\beta$  and  $\rho$ . Human data was fit using RL and BI models to compare the estimates of  $\beta$  (left row) and  $\rho$  (right row) between models. When both—independent—models lead to the same estimates, dots lie on the identity line. This was indeed the case for hierarchical Bayesian fitting (top row), but not for maximum likelihood fitting (bottom row).

### 1432 6.2.2. Hierarchical Bayesian Model Fitting

1433 Hierarchical Bayesian model fitting requires the choice of the shapes of  
 1434 the prior distributions from which individuals' parameters are drawn, and  
 1435 in some cases the choice of the distributions and parameters from which the  
 1436 parameters of the prior distributions are drawn. These choices can poten-  
 1437 tially influence fitting results; we chose non-informative prior distributions  
 1438 to limit the effect of these choices on our results. Table 5 shows the chosen  
 1439 distribution shapes and parameters.

1440 *Prior Distributions for Individual Parameters.* As shown in the table, in the  
1441 age-based model (see section 4.5.3 for the differentiation between the age-  
1442 based and age-free models), individuals' parameters were drawn from a Nor-  
1443 mal distribution around a parameter-specific, continuously age-dependent  
1444 mean  $\theta_m$ , with parameter-specific standard deviation  $\theta_{sd}$ .

1445 In the age-free model, on the other hand, individuals' parameters were  
1446 drawn from parameter-specific group-level prior distributions. The shapes of  
1447 these distributions were based on allowed parameter ranges (e.g., Gamma dis-  
1448 tribution for parameters with range  $[0, \infty]$ , Beta distribution for parameters  
1449 with range  $[0, 1]$ ). The same prior distribution was used for all individuals,  
1450 i.e., no age information was present in the age-free model. The distributions  
1451 of individuals' parameters were themselves parameterized by prior parame-  
1452 ters.

1453 *Hyper-Prior Distributions of Prior Distribution Parameters.* As further shown  
1454 in the table, in the age-based model, prior parameter  $\theta_{sd}$  was distributed  
1455 according to a HalfNormal (Normal, truncated at 0 to leave only support  
1456  $> 0$ ), and parameterized by hyper-parameter  $sd = 10$  to allow for a wide,  
1457 non-informative shape. Group-level prior  $\theta_m$  was defined as an age-based re-  
1458 gression function, parameterized by  $\theta_{int}$ ,  $\theta_{lin}$ , and  $\theta_{qua}$  for each parameter  $\theta$ .  
1459 The prior on the intercept  $\theta_{int}$  of each parameter in the age-based model had  
1460 the same shape as the group-level prior distribution in the age-free model,  
1461 and was parameterized by the same hyper-priors.

1462 In the age-less model, prior parameters parameterized the distributions  
1463 of individual model parameters.

Table 5: Priors and hyper-priors used in hierarchical Bayesian model fitting (Fig. 7B), chosen to be uninformative.

| Level                     | Parameter                                                                                                                                                   | Distribution / Value                                                   |
|---------------------------|-------------------------------------------------------------------------------------------------------------------------------------------------------------|------------------------------------------------------------------------|
| <b>Shared hyperpriors</b> | $a$                                                                                                                                                         | 1                                                                      |
|                           | $b$                                                                                                                                                         | 1                                                                      |
|                           | $m$                                                                                                                                                         | 0                                                                      |
|                           | $sd$                                                                                                                                                        | 10                                                                     |
| <b>Age-less model</b>     |                                                                                                                                                             |                                                                        |
| <i>Parameter priors</i>   | $a_\beta, b_\beta, a_{\alpha+}, b_{\alpha+}, a_{\alpha-}, b_{\alpha-},$<br>$a_p \text{ reward}, b_p \text{ reward}, a_p \text{ switch}, b_p \text{ switch}$ | Gamma( $\alpha = a, \beta = b$ )                                       |
|                           | $m_p$                                                                                                                                                       | Normal( $\mu = m, \sigma = sd$ )                                       |
| <i>Indiv. parameters</i>  | $sd_p$                                                                                                                                                      | HalfNormal( $\mu = m, \sigma = sd$ )                                   |
|                           | $\beta$                                                                                                                                                     | Gamma( $\alpha = a_\beta, \beta = b_\beta$ )                           |
|                           | $p$                                                                                                                                                         | Normal( $\mu = m_p, \sigma = sd_p$ )                                   |
|                           | $\alpha_+$                                                                                                                                                  | Beta( $\alpha = a_{\alpha+}, \beta = b_{\alpha+}$ )                    |
|                           | $\alpha_-$                                                                                                                                                  | Beta( $\alpha = a_{\alpha-}, \beta = b_{\alpha-}$ )                    |
|                           | $p_{reward}$                                                                                                                                                | Beta( $\alpha = a_{p_{reward}}, \beta = b_{p_{reward}}$ )              |
|                           | $p_{switch}$                                                                                                                                                | Beta( $\alpha = a_{p_{switch}}, \beta = b_{p_{switch}}$ )              |
| <b>Age-based model</b>    |                                                                                                                                                             |                                                                        |
| <i>Parameter priors</i>   | $\theta_{sd}$ , for any parameter $\theta$                                                                                                                  | HalfNormal( $\mu = m, \sigma = sd$ )                                   |
|                           | $\theta_m$ , for any parameter $\theta$                                                                                                                     | $\theta_{int} + \theta_{lin} \text{ age} + \theta_{qua} \text{ age}^2$ |
|                           | $\beta_{int}$                                                                                                                                               | Gamma( $\alpha = a, \beta = b$ )                                       |
|                           | $p_{int}$                                                                                                                                                   | Normal( $\mu = m, \sigma = sd$ )                                       |
|                           | $\alpha_+ \text{ int}, \alpha_- \text{ int}, p_{reward \text{ int}}, p_{switch \text{ int}}$                                                                | Beta( $\alpha = a, \beta = b$ )                                        |
| <i>Indiv. parameters</i>  | $\theta_{lin}, \theta_{qua}$ , for any parameter $\theta$                                                                                                   | Normal( $\mu = m, \sigma = sd$ )                                       |
|                           | $\theta$                                                                                                                                                    | Normal( $\mu = \theta_m, \sigma = \theta_{sd}$ )                       |

1464 It is important to verify the convergence of the Markov-Chain Monte-  
1465 Carlo (MCMC) chains that are used in hierarchical Bayesian model fitting  
1466 to approximate the intractable posterior distributions over model parameters  
1467 given a dataset  $p(\theta|data)$  (see section 4.5.3). To this aim, we calculated the  
1468 Markov-Chain error, effective sample size, and the R-hat statistic (suppl.  
1469 Table 6), using the functions provided by the PyMC3 toolbox (Salvatier et  
1470 al., 2016).

Table 6: Convergence of MCMC chains used in hierarchical Bayesian model fitting. We report the Markov-Chain error, effective sample size ( $n$ ), and the R-hat statistic ( $\hat{R}$ ), showing averages and ranges (min and max over all model parameters) for both winning models.

| Model              |       | MC error         | Effective $n$ | $\hat{R}$      |
|--------------------|-------|------------------|---------------|----------------|
| <b>4-param. RL</b> | mean  | < 0.001          | 2,517         | 1.001          |
|                    | range | [< 0.001; 0.002] | [155; 4,261]  | [1.000; 1.015] |
| <b>4-param. BI</b> | mean  | 0.002            | 816           | 1.001          |
|                    | range | [< 0.001; 0.01]  | [281; 1,576]  | [1.000; 1.004] |

1471 One of our main questions in this research was whether model parameter  
1472 changed with age. We used hierarchical Bayesian model fitting to address  
1473 this question, given the possibility to assess age-related differences in compu-  
1474 tational model parameters in an unbiased way using this method (see section  
1475 4.5.3). In order to estimate individual (and group-level) parameters in hier-  
1476 archical Bayesian model fitting, obtained MCMC samples are averaged; to  
1477 test particular parameter hypotheses (e.g., a parameter is greater than 0),  
1478 the proportion of samples is calculated in which the hypothesis is true, and  
1479 this proportion can be compared to a pre-determined p-value to assess sig-  
1480 nificance. Following this procedure, we determined whether the parameters  
1481 in the age-based model that controlled the effect of age on model parameters  
1482 showed significant differences from 0. Table 13 shows the results, revealing  
1483 significant linear and quadratic effects for some parameters.

### 1484 6.3. Supplemental Results

#### 1485 6.3.1. Additional Behavioral Measures

1486 We analyzed participant behavior in more detail than presented in the  
1487 main text. For example, we completed the assessment of performance by  
1488 analyzing the number of points won by each participant suppl. Fig. 7A, E),  
1489 we assessed flexibility by counting the trials it took participants between a  
1490 task switch to complete a behavioral switch (lower is faster; suppl. Fig. 7B,  
1491 F). We also assessed the effects of positive (suppl. Fig. 7D, H) and negative  
1492 ((suppl. Fig. 7C, G) outcomes on subsequent actions, using the regression  
1493 analysis described in section 4.4, whose statistics are reported in Table 7  
1494 below. Each behavior showed interesting age trajectories.

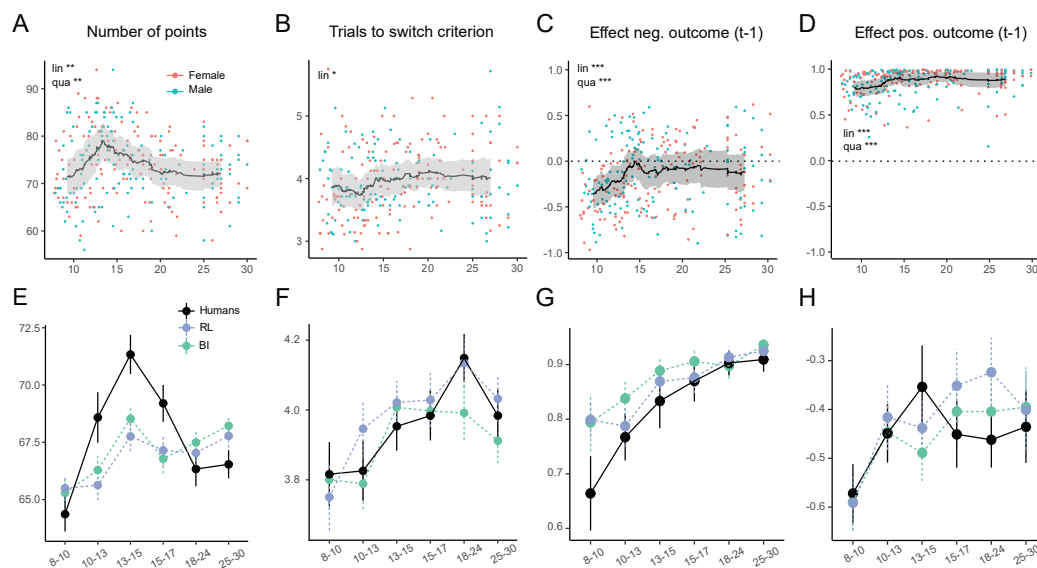

Figure 7: Human behavior (A-D) and model validation (E-H) for additional behavioral measures. (A, E) Number of points won by each participant. (A) Each dot represents one participant, colors denote sex; the lines shows the rolling average, shades the standard error, highlighting the performance peak in mid- to late adolescence. (E) Number of points, averaged within age groups, showing human as well as model behavior for validation. (B, F) Number of trials after task switch until participants reached performance criterion (2 correct responses). (C, D, G, H) Effect of previous negative (C, G) or positive (D, H) outcomes on participants' choices. " $t - 1$ ": The assessed outcome occurred 1 trial before choice, i.e., delay  $i = 1$ . Regression weights were tanh transformed for visualization. The youngest age groups showed the lowest overall and asymptotic accuracy (main text Fig. 3C, F) and were most likely to switch after a single negative outcome (main text Fig. 3E, suppl. Fig. 15B, middle). This explains why they were also fastest at switching (this Figure, parts B and F).

Table 7: Logistic mixed-effect regression, predicting future actions from past actions and outcomes. The number of predictors ( $i \leq 8$ ) was chosen as to provide the best model fit:  $AIC_{i \leq 3}$ : 31.046;  $AIC_{i \leq 4}$ : 31.013;  $AIC_{i \leq 5}$ : 31.001;  $AIC_{i \leq 6}$ : 30.981;  $AIC_{i \leq 7}$ : 30.963;  $AIC_{i \leq 8}$ : **30.962**;  $AIC_{i \leq 9}$ : 30.966;  $AIC_{i \leq 10}$ : 30.964.

| Predictor                     | delay $i$ | $\beta$ | $z$    | $p$     | Sig. |
|-------------------------------|-----------|---------|--------|---------|------|
| <b>Intercept</b>              |           | -0.01   | -0.74  | 0.46    |      |
| <b>Main effects</b>           |           |         |        |         |      |
| Age (lin.)                    |           | -0.13   | -1.40  | 0.16    |      |
| Age (qua.)                    |           | 0.12    | 1.30   | 0.19    |      |
| Pos. outcome                  | 1         | 2.19    | 68.09  | < 0.001 | ***  |
|                               | 2         | 0.84    | 27.36  | < 0.001 | ***  |
|                               | 3         | 0.24    | 7.87   | < 0.001 | ***  |
|                               | 4         | 0.13    | 4.30   | < 0.001 | ***  |
|                               | 5         | -0.017  | -0.54  | 0.58725 |      |
|                               | 6         | -0.017  | -0.56  | 0.57548 |      |
|                               | 7         | -0.0035 | -0.12  | 0.90613 |      |
|                               | 8         | -0.077  | -2.77  | 0.0057  | **   |
| Neg. outcome                  | 1         | -0.73   | -37.09 | < 0.001 | ***  |
|                               | 2         | -0.24   | -10.64 | < 0.001 | ***  |
|                               | 3         | 0.0055  | 0.22   | 0.82278 |      |
|                               | 4         | 0.13    | 5.39   | < 0.001 | ***  |
|                               | 5         | 0.12    | 4.87   | < 0.001 | ***  |
|                               | 6         | 0.12    | 4.73   | < 0.001 | ***  |
|                               | 7         | 0.13    | 5.32   | < 0.001 | ***  |
|                               | 8         | 0.016   | 0.71   | 0.47857 |      |
| <b>Interaction age (lin.)</b> |           |         |        |         |      |
| Pos. outcome                  | 1         | 0.90    | 4.50   | < 0.001 | ***  |
|                               | 2         | 0.84    | 4.19   | < 0.001 | ***  |
|                               | 3         | 0.50    | 2.52   | 0.012   | *    |
|                               | 4         | -0.069  | -0.35  | 0.73    |      |
|                               | 5         | 0.088   | 0.44   | 0.66    |      |
|                               | 6         | -0.38   | -1.94  | 0.052   |      |
|                               | 7         | -0.18   | -0.94  | 0.35    |      |
|                               | 8         | -0.27   | -1.49  | 0.14    |      |
| Neg. outcome                  | 1         | 0.67    | 5.27   | < 0.001 | ***  |
|                               | 2         | -0.37   | -2.48  | 0.013   | *    |
|                               | 3         | 0.16    | 1.03   | 0.30    |      |
|                               | 4         | -0.089  | -0.55  | 0.58    |      |
|                               | 5         | 0.012   | 0.07   | 0.94    |      |
|                               | 6         | 0.066   | 0.41   | 0.68    |      |
|                               | 7         | 0.011   | 0.07   | 0.94    |      |
|                               | 8         | -0.068  | -0.47  | 0.63    |      |
| <b>Interaction age (qua.)</b> |           |         |        |         |      |
| Pos. outcome                  | 1         | -0.64   | -3.14  | 0.0017  | **   |
|                               | 2         | -0.89   | -4.41  | < 0.001 | ***  |
|                               | 3         | -0.38   | -1.90  | 0.057   |      |
|                               | 4         | 0.0020  | 0.01   | 0.99    |      |
|                               | 5         | -0.066  | -0.33  | 0.74    |      |
|                               | 6         | 0.36    | 1.80   | 0.072   |      |
|                               | 7         | 0.15    | 0.75   | 0.456   |      |
|                               | 8         | 0.29    | 1.62   | 0.11    |      |
| Neg. outcome                  | 1         | -0.56   | -4.34  | < 0.001 | ***  |
|                               | 2         | 0.30    | 2.00   | 0.046   | *    |
|                               | 3         | -0.16   | -0.97  | 0.33    |      |
|                               | 4         | 0.092   | 0.57   | 0.57    |      |
|                               | 5         | -0.0070 | -0.04  | 0.97    |      |
|                               | 6         | -0.092  | -0.57  | 0.57    |      |
|                               | 7         | -0.057  | -0.35  | 0.72    |      |
|                               | 8         | 0.064   | 0.44   | 0.66    |      |

1495 *6.3.2. Comparing Behavioral Measures between Adolescents and Other Age*  
 1496 *Groups*

1497 In terms of which behavioral measures, and compared to which specific  
 1498 age groups, did adolescents perform better? For completeness, Table 8 re-  
 1499 ports the results of t-tests comparing the age bin of 13-to-15-year-olds to  
 1500 each other age group, in each performance measure. All tests were corrected  
 1501 for multiple comparisons using the Bonferroni method.

Table 8: T-tests comparing participants in the 13-to-15-year-old age bin to all other age groups in terms of overall accuracy (Fig. 3C), stay after apparent switch (Fig. 3E), accuracy on asymptotic trials (Fig. 3F), and total points won (Fig. 2B). Each row shows the comparison of mid- to late adolescence to one other age group.

| Measure                | Age group | $t$  | $p$     | sig. |
|------------------------|-----------|------|---------|------|
| Overall accuracy       | 8-10      | 6.76 | < 0.001 | ***  |
|                        | 10-13     | 4.19 | < 0.001 | ***  |
|                        | 15-17     | 2.58 | 0.052   |      |
|                        | 18-24     | 2.77 | 0.030   | *    |
|                        | 25-30     | 1.64 | 0.51    |      |
| Stay after app. switch | 8-10      | 5.31 | < 0.001 | ***  |
|                        | 10-13     | 2.86 | 0.026   | *    |
|                        | 15-17     | 1.00 | 1       |      |
|                        | 18-24     | 1.29 | 1       |      |
|                        | 25-30     | 1.91 | 0.30    |      |
| Asympt. accuracy       | 8-10      | 3.74 | 0.0017  | **   |
|                        | 10-13     | 1.73 | 0.44    |      |
|                        | 15-17     | 0.62 | 1       |      |
|                        | 18-24     | 1.19 | 1       |      |
|                        | 25-30     | 1.41 | 0.80    |      |
| Total points           | 8-10      | 4.70 | < 0.001 | ***  |
|                        | 10-13     | 1.68 | 0.48    |      |
|                        | 15-17     | 1.77 | 0.40    |      |
|                        | 18-24     | 4.64 | < 0.001 | ***  |
|                        | 25-30     | 4.57 | < 0.001 | ***  |

1502 *6.3.3. An Effect of Puberty?*

1503 As mentioned in the Discussion, our results show age differences in the  
1504 adaptation to stochastic and volatile environments, but do not identify a  
1505 biological mechanism that underlies these differences. One possibility are  
1506 puberty-related changes. To address this possibility, we asked participants  
1507 aged 8-17 to complete the pubertal developmental scale (PDS), a question-  
1508 naire that determines pubertal status based on questions about physical de-  
1509 velopment (Petersen et al., 1988), and to provide a 1.8 ml saliva sample,  
1510 which was analyzed for testosterone levels as a marker of pubertal develop-  
1511 ment, an hour after the start of the experiment and in-between tasks (for  
1512 detailed methods, see Master et al., 2020). We then investigated how perfor-  
1513 mance and model parameters changed with pubertal development, assessed  
1514 using these two measures. We found qualitatively similar developmental pat-  
1515 terns for puberty as for age (suppl. Fig. 9, 10, 11; suppl. Tables 10, 11),  
1516 making it difficult to disentangle the effects of both because pubertal mea-  
1517 sures were highly correlated with age (suppl. Fig. 8). To investigate whether  
1518 pubertal development had a unique effect after controlling for age, we also  
1519 tested puberty effects within age bins, but failed to observe differences that  
1520 were statistically significant (suppl. Fig. 12, 13, 14).

1521 Nevertheless, some trends that emerged in the pubertal analyses, espe-  
1522 cially in pre-pubertal participants, deserve a more detailed investigation in  
1523 future research, potentially employing longitudinal designs for enhanced ex-  
1524 perimental control (Kraemer et al., 2000).



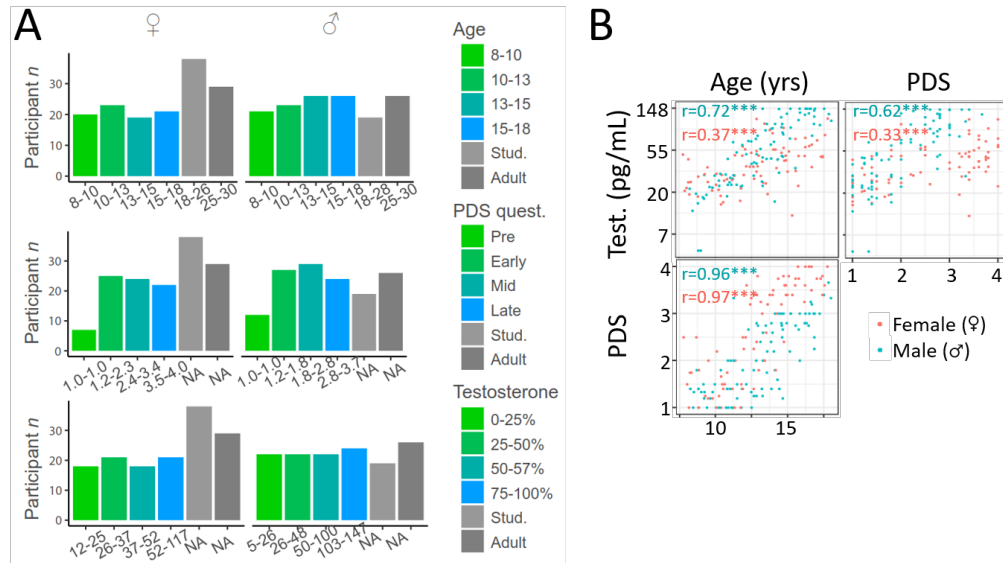

Figure 8: A) Participant numbers for each age bin (top), PDS score bin (middle), and Testosterone level bin (bottom). Pubertal measures were available for participants aged 8-17, and quantile bins were calculated in a similar way as for age, with one exception: For PDS scores, all participants with score 1 were classified as pre-pubertal, and the binning was only conducted for remaining participants. Note that PDS and testosterone ranges differed substantially between sexes. B) Correlations between age, testosterone levels (Test.), and PDS questionnaire, for male and female participants aged 8-17. Stars refer to p-values, using the same convention as in main text figures. For both males and females, PDS scores and testosterone levels were highly correlated with age, as well as with each other, making it difficult to assess these three factors separately.

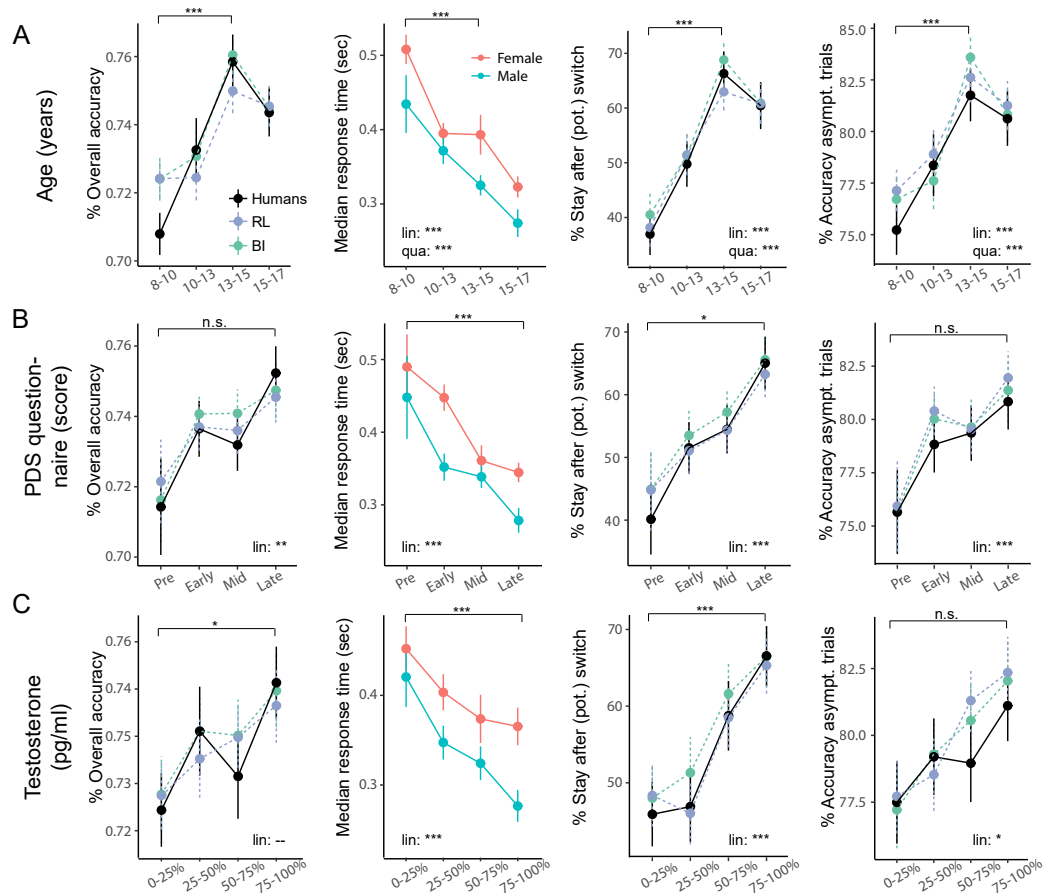

Figure 9: Behavior broken up by age (top row), PDS (middle row), and testosterone bins (bottom row). Significance bars and stars show the results of planned t-tests. A) Reproduced from main text Fig. 3. Planned t-tests compared 8-to-10-year-olds to 13-to-15-year-olds. B) Same data, but broken up by PDS bins. T-tests compared pre-pubertal to late-pubertal participants. C) Same data, broken up by testosterone bins. T-tests compared participants in the first quantile to participants in the fourth quantile. The figure shows that pubertal development (PDS, testosterone) was related to overall similar developmental patterns as age. The main difference lay in the bin of peak performance: Performance peaked in the third quantile based on age (13-15 years), but in the fourth quantiles based on PDS and testosterone.

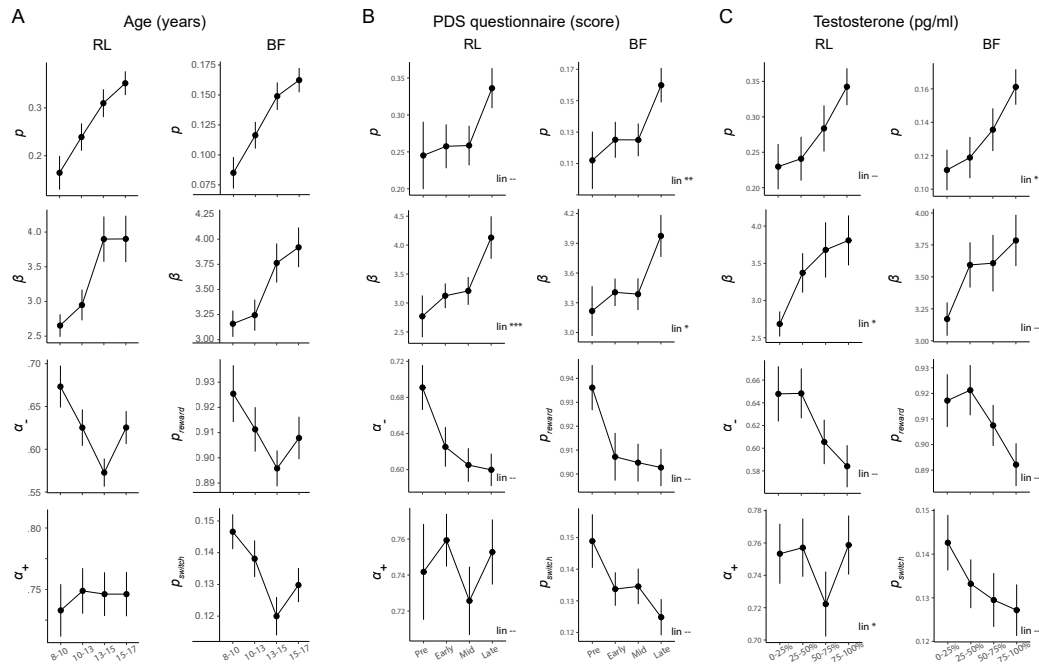

Figure 10: Model parameters broken up by age (A), PDS (B), and testosterone bins (C), showing that parameter trajectories varied slightly when analyzed through the lens of puberty compared to age. A) Reproduced from main text Fig. 4 after removing adult participants. B) Same data, broken up by PDS bins. Parameters  $p$  and  $\beta$  seem to show step functions between mid- and late puberty, as opposed to the gradual change with age (part A). Parameters  $\alpha_-$  and  $p_{reward}$  seemed to show a drastic step at puberty onset (between “pre” and “early”), rather than the age-based U-shape. C) Same data, broken up by testosterone bins. Parameters  $\alpha_-$ ,  $p_{reward}$ , and  $p_{switch}$  seemed to show U-shaped functions similar to age (elevated adult values are shown in main text Fig. 4), but minima occurred in the fourth rather than the third quantile. “lin.” indicates whether a linear effect of the measure of interest (PDS / testosterone) reached significance in a linear regression model.

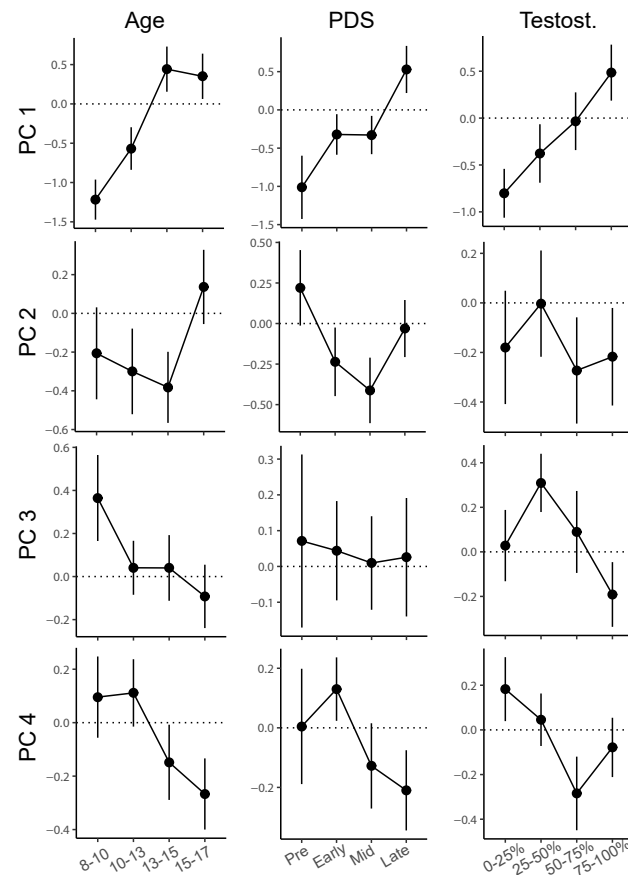

Figure 11: Model parameter PCs broken up by age (left), PDS (middle), and testosterone bins (right). Left: Reproduced from Fig. 5 after removing adult participants. Middle (right) row: same data, but broken up by PDS (testosterone) bins. This figure shows that in terms of parameter PCs, trajectories were relatively similar between pubertal measures and age. Slight differences included a more unique role of pre-pubertal participants, especially for PC2 in terms of PDS and PC3 for testosterone.

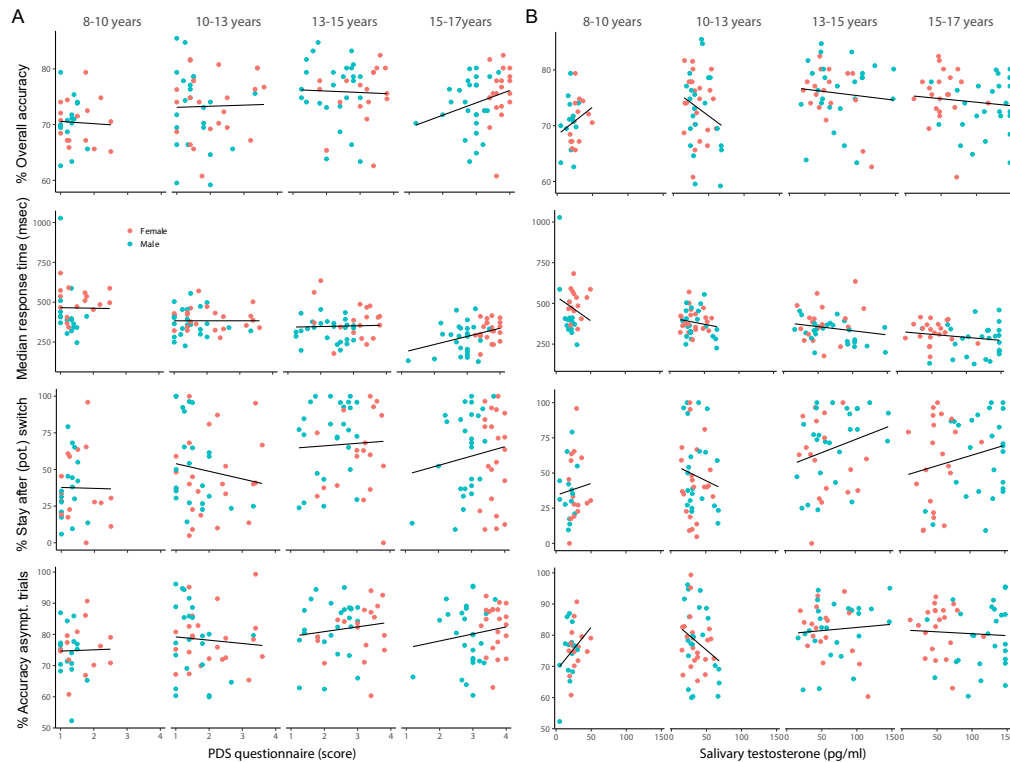

Figure 12: Effect of pubertal status on four performance measures, controlling for age. Each column shows one age group, colors denote sex. Pubertal status was determined by (A) PDS questionnaire, or (B) salivary testosterone. We sought to examine the effect of puberty after controlling for age. To this end, we investigated the continuous effects of puberty within each age bin, to eliminate—as much as possible—confounds with age (Master et al., 2020). A) In concordance with the finding that behavior peaked in the third age bin (13-15 years), but in the fourth PDS bin (75-100<sup>th</sup> percentile; suppl. Fig. 9), most performance measures increased qualitatively with respect to PDS in the third and fourth age bins (center-right and right-most column). Nevertheless, this pattern was difficult to interpret because pubertal status was heavily confounded with sex in the fourth age bin, such that girls scored higher on the PDS questionnaire than boys of the same age, a typical pattern that is caused by sex differences in pubertal maturation. It is therefore unclear whether the performance increase within the fourth age bin (right-most column) was driven by PDS scores or by sex. Stay after (pot.) switch trials showed a qualitative decrease with PDS score in 10-13 year olds, was constant in mid- to late adolescence, and showed a qualitative increase in 15-to-17-year-olds. This could indicate a weak U-shaped effect or might result from experimental noise. B) Same data, assessing age-controlled effects of testosterone on performance measures.

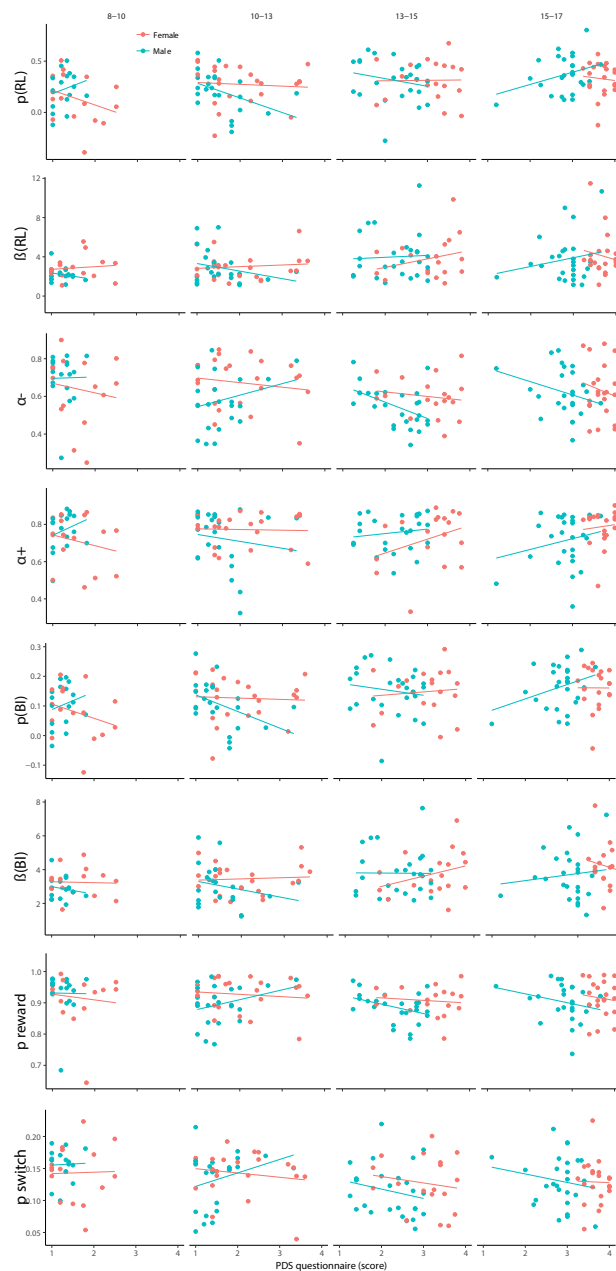

Figure 13: Effects of PDS scores on model parameters, controlling for age. Each column shows one age group, each row one parameter, and colors denote sex. Pubertal development did not show significant positive relationships with choice parameters  $p$  and  $\beta$ , which we might predict if pubertal development was a driving mechanism in growth for these parameters between ages 8-18 (see also suppl. Table 9 and suppl. Fig. 14). In terms of learning parameters, pubertal development also did not show significant negative relationships with  $\alpha_-$  and  $\alpha_+$  (RL), or  $p_{reward}$  and  $p_{switch}$  (BI), which we might predict if pubertal onset was driving the decrease of these parameters between ages 8-15. If anything, we saw the opposite pattern in males:  $\alpha_-$ ,  $p_{reward}$ , and  $p_{switch}$  showed a qualitatively positive relationship with PDS scores and testosterone (suppl. Fig. 14) in 10-to-13-year-olds, and a qualitatively negative relationship with PDS in mid- to late adolescence. Overwhelmingly, these relationships were not statistically significant (suppl. Table 9). Trend relationships within mid- to late adolescence included a marginal effect of PDS on  $\alpha_+$  (suppl. Table 9). Note, however, that statistical tests were not corrected for

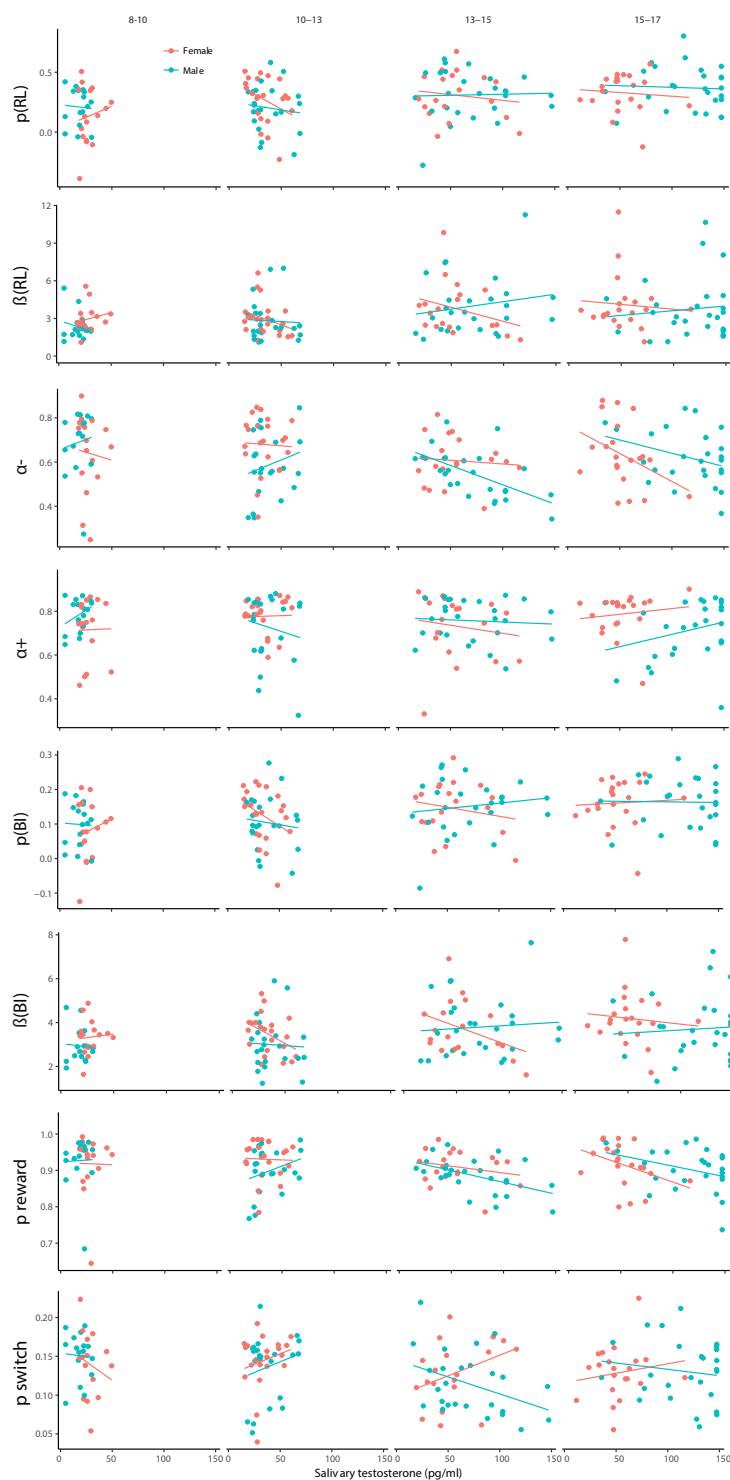

79

Figure 14: Effects of salivary testosterone levels on model parameters, controlling for age. Each column shows one age group, each row one parameter, and colors denote sex. Trend relationships within mid- to late adolescence included a marginal effect of sex on  $p_{switch}$  in the testosterone model, and a significant interaction between sex and testosterone on  $p_{switch}$  (suppl. Table 9). Note, however, that statistical tests were not corrected for multiple comparisons, making it possible that these results were observed by chance, and should thus be interpreted carefully.

Table 9: Statistics of regression models testing effects of puberty within the age bin 13-15 years. This bin was chosen because it contained participants across the full range of pubertal development.

| Outcome             | Predictor   | $\beta$  | $p$   | Sig. |
|---------------------|-------------|----------|-------|------|
| <b>Testosterone</b> |             |          |       |      |
| $p$ (RL)            | Test.       | -0.00096 | 0.57  |      |
|                     | Sex         | 0.062    | 0.65  |      |
|                     | Interaction | 0.0011   | 0.58  |      |
| $\beta$ (RL)        | Test.       | -0.022   | 0.23  |      |
|                     | Sex         | 1.86     | 0.22  |      |
|                     | Interaction | 0.034    | 0.13  |      |
| $\alpha_-$          | Test.       | -0.00033 | 0.69  |      |
|                     | Sex         | 0.047    | 0.48  |      |
|                     | Interaction | 0.0014   | 0.16  |      |
| $\alpha_+$          | Test.       | -0.00074 | 0.47  |      |
|                     | Sex         | 0.0026   | 0.97  |      |
|                     | Interaction | 0.00055  | 0.65  |      |
| $p$ (BF)            | Test.       | -0.00052 | 0.43  |      |
|                     | Sex         | 0.045    | 0.40  |      |
|                     | Interaction | 0.00083  | 0.30  |      |
| $\beta$ (BF)        | Test.       | -0.018   | 0.12  |      |
|                     | Sex         | 1.12     | 0.21  |      |
|                     | Interaction | 0.021    | 0.12  |      |
| $p_{reward}$        | Test.       | -0.00038 | 0.31  |      |
|                     | Sex         | 0.0012   | 0.97  |      |
|                     | Interaction | 0.00027  | 0.54  |      |
| $p_{switch}$        | Test.       | 0.00053  | 0.10  |      |
|                     | Sex         | 0.047    | 0.078 | ,    |
|                     | Interaction | 0.00097  | 0.015 | *    |
| <b>PDS</b>          |             |          |       |      |
| $p$ (RL)            | PDS         | 0.0044   | 0.95  |      |
|                     | Sex         | 0.18     | 0.52  |      |
|                     | Interaction | 0.079    | 0.43  |      |
| $\beta$ (RL)        | PDS         | 0.87     | 0.30  |      |
|                     | Sex         | 2.37     | 0.45  |      |
|                     | Interaction | 0.67     | 0.55  |      |
| $\alpha_-$          | PDS         | -0.024   | 0.52  |      |
|                     | Sex         | 0.071    | 0.61  |      |
|                     | Interaction | 0.063    | 0.21  |      |
| $\alpha_+$          | PDS         | 0.075    | 0.092 | ,    |
|                     | Sex         | 0.21     | 0.21  |      |
|                     | Interaction | 0.051    | 0.39  |      |
| $p$ (BF)            | PDS         | 0.011    | 0.69  |      |
|                     | Sex         | 0.084    | 0.45  |      |
|                     | Interaction | 0.032    | 0.43  |      |
| $\beta$ (BF)        | PDS         | 0.62     | 0.21  |      |
|                     | Sex         | 1.96     | 0.30  |      |
|                     | Interaction | 0.64     | 0.34  |      |
| $p_{reward}$        | PDS         | -0.0080  | 0.63  |      |
|                     | Sex         | 0.023    | 0.72  |      |
|                     | Interaction | 0.022    | 0.33  |      |
| $p_{switch}$        | PDS         | -0.010   | 0.51  |      |
|                     | Sex         | 0.010    | 0.86  |      |
|                     | Interaction | 0.0057   | 0.82  |      |



Table 10: Statistics of mixed-effects regression models predicting performance measures from sex (male, female) and puberty measures (PDS questionnaire / salivary testosterone). Only participants aged 8-17 were included in this analyses because pubertal measures were only available for them. Overall accuracy, stay after potential (pot.) switch, and asymptotic performance were modeled using logistic regression, and z-scores are reported. Log-transformed response times on correct trials were modeled using linear regression, and t-values are reported. \*  $p < .05$ ; \*\*  $p < .01$ , \*\*\*  $p < .001$ . Within the age bins that contained participants across the entire range of pubertal status (10-13, 13-15, and 15-17 years), few significant effects of PDS (part A) or salivary testosterone levels (part B) were observed, possibly including some that occurred by chance.

| Performance measure (Figure)                             | Predictor | $\beta$  | z / t | p       | sig. |
|----------------------------------------------------------|-----------|----------|-------|---------|------|
| Overall accuracy (9B, left)                              | PDS       | 0.069    | 2.9   | 0.0038  | **   |
|                                                          | Sex       | 0.017    | 0.37  | 0.71    |      |
| Response times (9B, 2 <sup>nd</sup> -to-left)            | PDS       | -0.13    | -4.9  | < 0.001 | ***  |
|                                                          | Sex       | 0.25     | 4.8   | < 0.001 | ***  |
| Stay after (pot.) switch (9B, 2 <sup>nd</sup> -to-right) | PDS       | 0.48     | 3.5   | < 0.001 | ***  |
|                                                          | Sex       | 0.76     | 2.9   | 0.0036  | **   |
| Asymptotic performance (9B, right)                       | PDS       | 0.25     | 4.2   | < 0.001 | ***  |
|                                                          | Sex       | 0.098    | 0.9   | 0.39    |      |
| Overall accuracy (9C, left)                              | Test.     | < 0.0001 | 1.2   | 0.24    |      |
|                                                          | Sex       | 0.032    | 0.69  | 0.49    |      |
| Response times (9C, 2 <sup>nd</sup> -to-left)            | Test.     | -0.0034  | -5.1  | < 0.001 | ***  |
|                                                          | Sex       | 0.010    | 1.9   | 0.049   | *    |
| Stay after (pot.) switch (9C, 2 <sup>nd</sup> -to-right) | Test.     | 0.012    | 3.5   | < 0.001 | ***  |
|                                                          | Sex       | 0.27     | 1.0   | 0.29    |      |
| Asymptotic performance (9C, right)                       | Test.     | 0.0034   | 2.2   | 0.029   | *    |
|                                                          | Sex       | 0.12     | 1.0   | 0.34    |      |

Table 11: Parameter estimates and statistics from hierarchical model fitting, for pubertal predictors (PDS questionnaire, salivary testosterone), for participants under the age of 18. Significance tests against 0 for parameters whose range includes 0, NA otherwise.

| Model               | Parameter         | $\mu + -sd$       | 95% CI            | p-value | sig. |
|---------------------|-------------------|-------------------|-------------------|---------|------|
| <b>PDS</b>          |                   |                   |                   |         |      |
| 4-param. BI         | $p_{int}$         | 0.11 + -0.013     | [0.082, 0.13]     | < 0.001 | ***  |
|                     | $p_{sd}$          | 0.089 + -0.0085   | [0.073, 0.11]     | 0       | NA   |
|                     | $p_{lin}$         | 0.022 + -0.0096   | [0.0039, 0.041]   | 0.0086  | **   |
|                     | $\beta_{int}$     | 3.81 + -0.26      | [3.31, 4.34]      | 0       | NA   |
|                     | $\beta_{sd}$      | 1.25 + -0.14      | [0.98, 1.53]      | 0       | NA   |
|                     | $\beta_{lin}$     | 0.31 + -0.16      | [-0.018, 0.62]    | 0.028   | *    |
|                     | $P_{reward\ int}$ | 0.88 + -0.019     | [0.84, 0.92]      | 0       | NA   |
|                     | $P_{reward\ sd}$  | 0.060 + -0.011    | [0.038, 0.082]    | 0       | NA   |
|                     | $P_{reward\ lin}$ | < 0.001 + -0.010  | [-0.019, 0.020]   | 0.48    | -    |
|                     | $P_{switch\ int}$ | 0.16 + -0.016     | [0.13, 0.20]      | 0       | NA   |
|                     | $P_{switch\ sd}$  | 0.067 + -0.0070   | [0.053, 0.080]    | 0       | NA   |
|                     | $P_{switch\ lin}$ | -0.0098 + -0.0099 | [-0.029, 0.0099]  | 0.16    | -    |
| 4-param. RL         | $p_{int}$         | 0.25 + -0.026     | [0.20, 0.30]      | < 0.001 | ***  |
|                     | $p_{sd}$          | 0.24 + -0.019     | [0.20, 0.28]      | 0       | NA   |
|                     | $p_{lin}$         | 0.039 + -0.024    | [-0.0093, 0.087]  | 0.054   | -    |
|                     | $\beta_{int}$     | 3.15 + -0.13      | [2.90, 3.41]      | 0       | NA   |
|                     | $\beta_{sd}$      | 1.37 + -0.13      | [1.12, 1.62]      | 0       | NA   |
|                     | $\beta_{lin}$     | 0.41 + -0.13      | [0.17, 0.66]      | < 0.001 | ***  |
|                     | $\alpha_{- int}$  | 0.60 + -0.016     | [0.56, 0.62]      | 0       | NA   |
|                     | $\alpha_{- sd}$   | 0.16 + -0.013     | [0.14, 0.18]      | 0       | NA   |
|                     | $\alpha_{- lin}$  | -0.0155 + -0.017  | [-0.048, 0.019]   | 0.18    | -    |
|                     | $\alpha_{+ int}$  | 0.66 + -0.028     | [0.61, 0.72]      | 0       | NA   |
|                     | $\alpha_{+ sd}$   | 0.35 + -0.034     | [0.023, 0.15]     | 0       | NA   |
|                     | $\alpha_{+ lin}$  | 0.0085 + -0.027   | [-0.048, 0.059]   | 0.38    | -    |
| <b>Testosterone</b> |                   |                   |                   |         |      |
| 4-param. BI         | $p_{int}$         | 0.11 + -0.013     | [0.081, 0.13]     | < 0.001 | ***  |
|                     | $p_{sd}$          | 0.089 + -0.0084   | [0.073, 0.11]     | 0       | NA   |
|                     | $p_{lin}$         | 0.02 + -0.010     | [0.0023, 0.040]   | 0.015   | *    |
|                     | $\beta_{int}$     | 3.78 + -0.26      | [3.29, 4.31]      | 0       | NA   |
|                     | $\beta_{sd}$      | 1.28 + -0.14      | [1.00, 1.55]      | 0       | NA   |
|                     | $\beta_{lin}$     | 0.12 + -0.17      | [-0.20, 0.45]     | 0.22    | -    |
|                     | $P_{reward\ int}$ | 0.88 + -0.019     | [0.85, 0.92]      | 0       | NA   |
|                     | $P_{reward\ sd}$  | 0.056 + -0.011    | [0.035, 0.077]    | 0       | NA   |
|                     | $P_{reward\ lin}$ | -0.0135 + -0.010  | [-0.033, 0.0081]  | 0.90    | -    |
|                     | $P_{switch\ int}$ | 0.16 + -0.016     | [0.13, 0.19]      | 0       | NA   |
|                     | $P_{switch\ sd}$  | 0.067 + -0.0069   | [0.054, 0.081]    | 0       | NA   |
|                     | $P_{switch\ lin}$ | -0.0082 + -0.010  | [-0.029, 0.012]   | 0.22    | -    |
| 4-param. RL         | $p_{int}$         | 0.24 + -0.025     | [0.20, 0.29]      | < 0.001 | ***  |
|                     | $p_{sd}$          | 0.24 + -0.0195    | [0.20, 0.28]      | 0       | NA   |
|                     | $p_{lin}$         | 0.038 + -0.025    | [-0.0091, 0.190]  | 0.066   | -    |
|                     | $\beta_{int}$     | 3.16 + -0.14      | [2.89, 3.43]      | 0       | NA   |
|                     | $\beta_{sd}$      | 1.42 + -0.13      | [1.17, 1.69]      | 0       | NA   |
|                     | $\beta_{lin}$     | 0.28 + -0.13      | [0.037, 0.54]     | 0.013   | *    |
|                     | $\alpha_{- int}$  | 0.60 + -0.017     | [0.55, 0.62]      | 0       | NA   |
|                     | $\alpha_{- sd}$   | 0.16 + -0.013     | [0.13, 0.18]      | 0       | NA   |
|                     | $\alpha_{- lin}$  | -0.035 + -0.018   | [-0.070, -0.0016] | 0.24    | -    |
|                     | $\alpha_{+ int}$  | 0.66 + -0.028     | [0.61, 0.72]      | 0       | NA   |
|                     | $\alpha_{+ sd}$   | 0.10 + -0.030     | [0.045, 0.16]     | 0       | NA   |
|                     | $\alpha_{+ lin}$  | -0.017 + -0.026   | [-0.066, 0.036]   | 0.015   | *    |

1525 *6.3.4. Qualitative Model Fit of RL and BI*

1526 To test the qualitative fit of our models, we simulated behavior using fitted  
1527 parameters (from the age-free model; section 4.5.3) and checked whether the  
1528 simulated behavior was able to reproduce the patterns of interest in the  
1529 human data (Blohm et al., 2020; Palminteri et al., 2017; Wilson and Collins,  
1530 2019). We found that RL and BI models replicated human behavior and  
1531 age differences, including linear increase in staying after positive outcomes  
1532 (“+ +” and “- +”), and the inverse-U shape on potential switch trials (red  
1533 arrow; “+ -” condition). Qualitative (non-significant) sex differences were  
1534 also captured (suppl. Fig. 15B). Both models also captured quicker switching  
1535 on switch trials in younger (light green) compared to older participants (blue  
1536 and grey), and best performance on asymptotic trials in adolescents (green-  
1537 blue; suppl. Fig. 15A). In summary, both the winning RL and BI model  
1538 captured human learning curves, as well as sex and age differences, very  
1539 closely. Simpler, non-winning models, on the other hand, failed to capture  
1540 human characteristics (suppl. Fig. 17, 16).

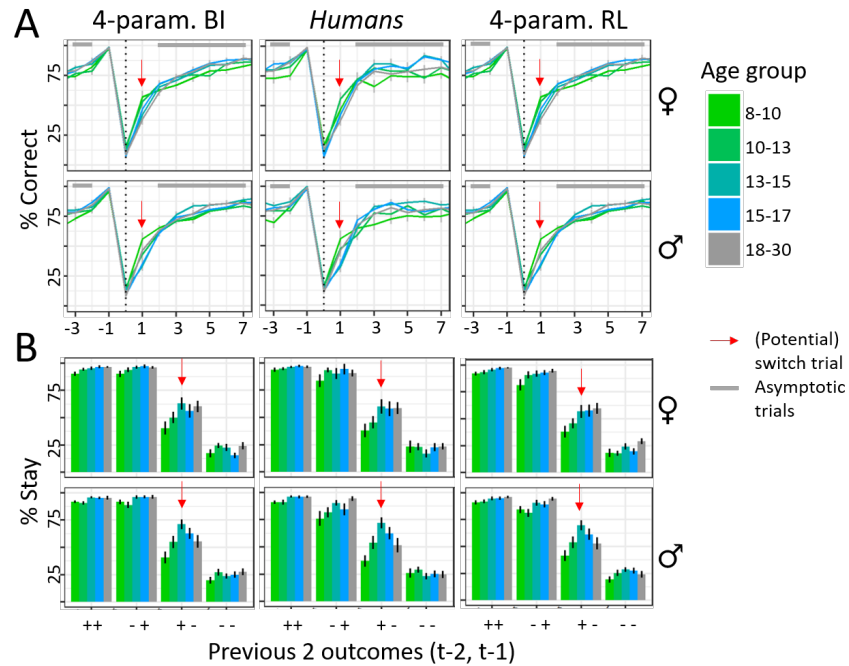

Figure 15: A) Behavior in response to switch trials. Colors refer to age groups, red arrows show switch trials, grey bars trials of asymptotic performance. B) Stay probability in response to outcomes 1 and 2 trials back.

1541 To assess effects of age groups, we tested differences in posterior samples  
 1542 of the age-free model. Statistics are shown in suppl. Table 12.

Table 12: Parameter differences between specific age groups. p-values were obtained by assessing means for each parameter for three age groups (8-10, 13-15, and 18-30) and show in how many MCMC samples the group mean of 8-10 year olds (18-30 year olds) was smaller than the group mean of mid- to late adolescence.

| Parameter    | Compared groups | p-value | sig. |
|--------------|-----------------|---------|------|
| $\alpha_-$   | 8-10 vs 13-15   | 0       | ***  |
|              | 13-15 vs 18-30  | 0.0045  | **   |
| $p_{reward}$ | 8-10 vs 13-15   | 0.019   | *    |
|              | 13-15 vs 18-30  | 0.078   | ,    |
| $p_{switch}$ | 8-10 vs 13-15   | 0.023   | *    |
|              | 13-15 vs 18-30  | 0.13    |      |

1543 To evaluate continuous age effects in a statistically sound way, we used  
 1544 a hierarchical Bayesian model that explicitly modeled age effects (the “age-  
 1545 based” model; Fig. 3B). Significant effects (suppl. Table 13) are shown as  
 1546 lines in suppl. Figures 17 and 16.

Table 13: Parameter estimates and statistics from hierarchical model fitting. Significance tests against 0 for parameters whose ranges include 0, NA otherwise.

| Model              | Parameter        | $\mu + -sd$       | 95% CI           | p-value | sig. |
|--------------------|------------------|-------------------|------------------|---------|------|
| <b>4-param. RL</b> | $p_{int}$        | 0.34 + -0.027     | [0.29, 0.39]     | < 0.001 | ***  |
|                    | $p_{sd}$         | 0.24 + -0.015     | [0.21, 0.26]     | 0       | NA   |
|                    | $p_{lin}$        | 0.11 + -0.020     | [0.075, 0.15]    | < 0.01  | **   |
|                    | $p_{qua}$        | -0.050 + -0.020   | [-0.089, -0.012] | 0.0051  | **   |
|                    | $\beta_{int}$    | 3.48 + -0.15      | [3.18, 3.79]     | 0       | NA   |
|                    | $\beta_{sd}$     | 1.48 + -0.10      | [1.29, 1.69]     | 0       | NA   |
|                    | $\beta_{lin}$    | 0.36 + -0.11      | [0.14, 0.57]     | < 0.001 | ***  |
|                    | $\beta_{qua}$    | -0.22 + -0.11     | [-0.42, -0.015]  | 0.020   | *    |
|                    | $\alpha_{- int}$ | 0.60 + -0.018     | [0.56, 0.63]     | 0       | NA   |
|                    | $\alpha_{- sd}$  | 0.16 + -0.0093    | [0.14, 0.18]     | 0       | NA   |
|                    | $\alpha_{- lin}$ | 0.011 + -0.015    | [-0.017, 0.040]  | 0.77    |      |
|                    | $\alpha_{- qua}$ | 0.013 + -0.014    | [-0.013, 0.040]  | 0.84    |      |
|                    | $\alpha_{+ int}$ | 0.73 + -0.034     | [0.66, 0.79]     | 0       | NA   |
|                    | $\alpha_{+ sd}$  | 0.081 + -0.021    | [0.042, 0.12]    | 0       | NA   |
|                    | $\alpha_{+ lin}$ | 0.055 + -0.024    | [0.0045, 0.10]   | 0.015   | *    |
| $\alpha_{+ qua}$   | -0.015 + -0.021  | [-0.055, 0.027]   | 0.25             |         |      |
| <b>4-param. BI</b> | $p_{int}$        | 0.13 + -0.013     | [0.11, 0.16]     | < 0.001 | ***  |
|                    | $p_{sd}$         | 0.081 + -0.0061   | [0.069, 0.093]   | 0       | NA   |
|                    | $p_{lin}$        | 0.04 + -0.008     | [0.023, 0.054]   | < 0.001 | ***  |
|                    | $p_{qua}$        | -0.02 + -0.007    | [-0.038, -0.010] | < 0.001 | ***  |
|                    | $\beta_{int}$    | 4.27 + -0.27      | [3.76, 4.83]     | 0       | NA   |
|                    | $\beta_{sd}$     | 1.39 + -0.12      | [1.16, 1.64]     | 0       | NA   |
|                    | $\beta_{lin}$    | 0.39 + -0.17      | [0.054, 0.72]    | 0.011   | *    |
|                    | $\beta_{qua}$    | < 0.001 + -0.16   | [-0.32, 0.30]    | 0.49    |      |
|                    | $p_{reward int}$ | 0.87 + -0.016     | [0.84, 0.91]     | 0       | NA   |
|                    | $p_{reward sd}$  | 0.064 + -0.0087   | [0.046, 0.081]   | 0       | NA   |
|                    | $p_{reward lin}$ | 0.0045 + -0.0096  | [-0.014, 0.024]  | 0.68    |      |
|                    | $p_{reward qua}$ | -0.0017 + -0.0085 | [-0.018, 0.015]  | 0.43    |      |
|                    | $p_{switch int}$ | 0.16 + -0.014     | [0.14, 0.19]     | 0       | NA   |
|                    | $p_{switch sd}$  | 0.071 + -0.0053   | [0.062, 0.083]   | 0       | NA   |
|                    | $p_{switch lin}$ | -0.0066 + -0.0095 | [-0.025, 0.012]  | 0.24    |      |
| $p_{switch qua}$   | 0.014 + -0.0082  | [-0.0013, 0.030]  | 0.042            | *       |      |

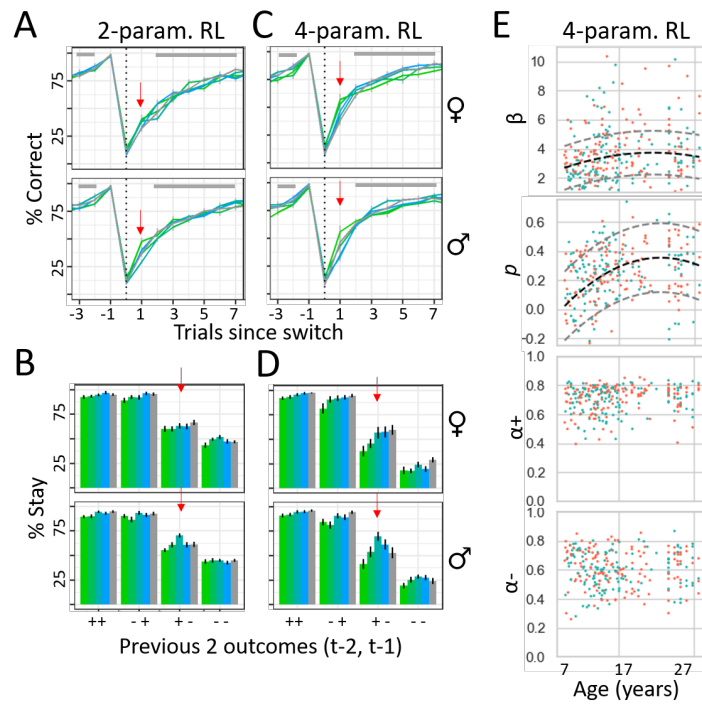

Figure 16: Qualitative fit of different versions of the RL model. Model behavior is shown in the same way as human behavior in suppl. Fig. 15. A-B) Behavior of simulations from the basic, 2-parameter version, with free parameters  $\alpha$  and  $\beta$ . Lacking counterfactual updating and the ability to differentiate positive and negative outcomes, the model was unable to capture the shape of human learning curves and age differences. Colors denote age groups, red arrow (potential) switch trials, and grey bars asymptotic trials, as in suppl. Fig. 15. C-D) Behavior of simulations from the winning, 4-parameter RL model, in which free parameters  $\beta$ ,  $p$ ,  $\alpha_+$ , and  $\alpha_-$  were fitted to participants using hierarchical Bayesian model fitting (age-less model; see section 4.5.3). E) Fitted parameters of each individual. Dashed lines show significant age differences (Table 13). This is the same data as summarized in Fig. 4A-D.

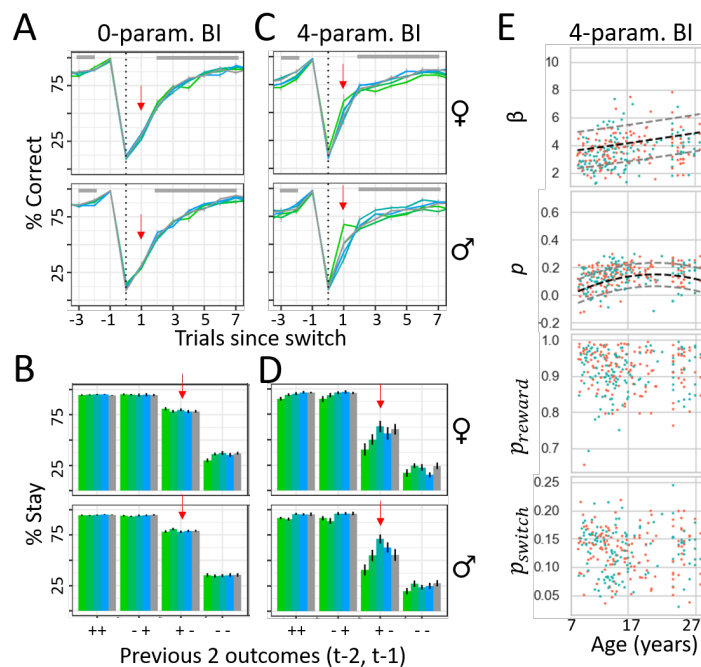

Figure 17: Qualitative fit of different versions of the BI model. Model behavior is shown in the same way as human behavior in suppl. Fig. 15. A-B) Behavior of simulations from the basic, 0-parameter version, in which truthfully  $p_{reward} = 0.75$  and  $p_{switch} = 0.05$ . Lacking free parameters, the model predicted the same behavior for all participants, being unable to capture age differences. C-D) Behavior of simulations from the winning, 4-parameter version of the BI model, in which free parameters  $\beta$ ,  $p$ ,  $p_{reward}$ , and  $p_{switch}$  were fitted to participants using hierarchical Bayesian model fitting. To avoid double-dipping into age differences when visualizing the model, we fitted the model *without* access to participants' age (Methods). E) Fitted parameters of each individual, based on the same model. Dashed lines show age differences when significant (suppl. Table 13). This is the same data as summarized in Fig. 4.

#### 1547 6.3.5. Generate and Recover Model Parameters (Fig. 5A)

1548 In order to assess whether the RL and BI models made the same or  
 1549 different behavioral predictions, we conducted a generate-and-recover test  
 1550 (section 2.3): Artificial behavior is simulated from both models, and the  
 1551 simulated datasets are fitted using both models. Specifically, we simulated  
 1552 one dataset per participant from each model (RL and BI), using the model  
 1553 parameters fitted for the participant (age-free model). We then fitted the  
 1554 simulated data with the RL and BI model (age-free model). We finally



1555 calculated WAIC scores and standard errors using PyMC3 (Salvatier et al.,  
1556 2016). If both datasets are fitted equally well by both models, they are  
1557 not distinguishable—the behavior they each produce is so similar that both  
1558 models capture it equally well. If one model fits both behavioral datasets  
1559 better, it is more appropriate and subsumes the other. If, however, each  
1560 model fits the artificial dataset better than that was generated by its own class  
1561 (e.g.,  $RL \leftrightarrow RL$ ), both models must produce different behaviors to explain  
1562 why the corresponding model captures it more neatly. This pattern was the  
1563 case for our models: Based on human-fitted parameter values for simulation  
1564 (Heathcote et al., 2015; Wilson and Collins, 2019), each model fit its own  
1565 simulated dataset better than to the other model's (Fig. 5A). This confirms  
1566 that the winning RL and BI models were distinguishable, i.e., predicted  
1567 different behaviors.

1568 Comparable results were obtained when using the more classical generate-  
1569 and-recover method of assessing the number of best-fitted models based on  
1570 maximum likelihood (suppl. Fig. 18), rather than hierarchical Bayesian  
1571 model fit (WAIC; Fig. 5A).

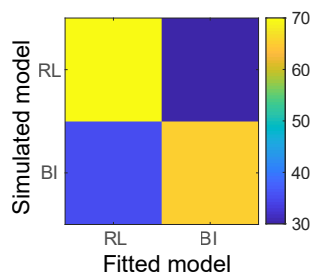

Figure 18: Number of simulated datasets (out of 100) of each model (y-axis) that were best fit using each of the two models (RL and BI; x-axis). Lighter colors indicate larger fractions and highlight the diagonal of the confusion matrix, showing that RL simulations were best recovered by the RL model and BI simulations by the BI model, using maximum likelihood.

### 1572 6.3.6. Trial Types of Behavioral Difference for RL versus BI

1573 Further analyses showed that the differences between RL and BI could  
1574 be traced to specific types of decision situations: The RL model is more  
1575 likely to stay with a choice after receiving two consecutive rewards than after  
1576 receiving just a single reward because the action value is increased twice  
1577 in the former case, but only once in the latter. To assess this, we used a

1578 t-test to compare the probability of RL model simulations (based on human-  
1579 fitted parameters) to stay between both cases ( $t = 2.6$ ,  $p = 0.010$ ). The BI  
1580 model, however, is equally likely to stay in both cases ( $t = -0.5$ ,  $p = 0.6$ )  
1581 because a single reward already leads to maximally certain state inference,  
1582 and another reward cannot increase this probability further. This analysis  
1583 provides a concrete example of how the RL and BI models differ in terms of  
1584 behavior, confirming that they do not make identical predictions.

### 1585 6.3.7. *Between-Model Parameter Similarities, Assessed Using Regression (Fig.* 1586 *5C)*

1587 The correlation analysis in section 2.4 showed that both models captured  
1588 similar processes using different *individual* parameters, but similar processes  
1589 might also be captured in the interplay between *several* parameters. To  
1590 investigate this possibility, we used linear regression to evaluate how well  
1591 we could predict each parameter based on the parameters and one-way pa-  
1592 rameter interactions of the other model. This analysis revealed that 7 of 8  
1593 parameters could be predicted almost perfectly (Fig. 5C), showing that the  
1594 interplay between parameters in one model captured almost all variance in  
1595 almost every parameter in the opposite model. In other words, fitting the  
1596 RL model to participants' data allowed us to nearly perfectly predict par-  
1597 ticipants' BI parameters, without fitting the BI model. Parameter  $\alpha_+$  (RL)  
1598 was again an exception, with only small amounts of variance captured by  
1599 BI parameters, suggesting that it reflected mechanisms that were unique to  
1600 the RL model. These mechanisms might increase the versatility of the RL  
1601 model, and possibly account for the slightly better numerical fit of the RL  
1602 model to human (Table 2) and simulated data (Fig. 5A). In sum, in ad-  
1603 dition to significant similarities between individual parameters, the RL and  
1604 BI models showed even greater similarities in terms of cognitive processes  
1605 that were captured in the interactions between multiple parameters. This  
1606 suggests that both models captured very similar cognitive processes, albeit  
1607 without reaching identity (e.g., parameter  $\alpha_+$ ).

1608 We ran eight different regression models, predicting each parameter from  
1609 the 4 parameters of the opposite model, as well as their one-way interactions,  
1610 using linear regression in R (RCoreTeam, 2016). Fig. 5C shows the explained  
1611 variance ( $R^2$ ) of each model.

1612 *6.3.8. Details on the PCA Analysis*

1613 We conducted a PCA on the joint parameter space of our winning RL and  
1614 BI models in the hope of identifying model-general factors (PCs) that explain  
1615 age differences in cognitive processing. The crucial step in this analysis is to  
1616 interpret the resulting PCs. PCs are often interpreted through the weights  
1617 (factor loadings) that each raw feature (model parameter) has on the PC (a  
1618 PC is just a linear combination of raw features). In our case, this approach  
1619 was impeded by the fact that model parameters are themselves difficult to  
1620 interpret because their roles are influenced by many factors, including the  
1621 underlying task (Eckstein, Master, et al., 2021) and computational model  
1622 (Sugawara and Katahira, 2021), which makes them less suitable to anchor  
1623 the meaning of PCs.

1624 For this reason, we devised the following simulation approach: We simu-  
1625 lated data from our computational models based on the obtained principal  
1626 components (PCs) in order to visualize the role of each PC. It is common  
1627 practice to simulate data based on small or large values of a parameter (e.g.,  
1628 smaller or larger decision noise  $\beta$ ) to assess the role of this parameter for  
1629 model behavior (e.g., better or worse performance). We similarly simulated  
1630 data based on smaller or larger values of each PC to clarify the precise role  
1631 of each PC: We calculated two sets of parameters for each PC, one that  
1632 represented high levels of this PC (“plus”), and one that represented low  
1633 values (“minus”). Low levels were determined by subtracting 4 times the  
1634 inverse-z-scored factor loading of a PC (center) from the population mean of  
1635 each parameter; low levels were determined by adding it. Suppl. Table 14  
1636 shows these two sets of parameters. (For PC2 of the BI model, we added  
1637 and subtracted 2 times the factor loading instead, to ensure  $p_{reward} < 1$ .)  
1638 We then simulated behavior based on the resulting parameters to assess the  
1639 effect of low versus high values of each PC.

Table 14: Parameters used in suppl. Fig. 19 to visualize the role of PCs.

|                | $p$ (RL) | $\beta$ (RL) | $\alpha_-$ | $\alpha_+$ | $p$ (BI) | $\beta$ (BI) | $p_{reward}$ | $p_{switch}$ |
|----------------|----------|--------------|------------|------------|----------|--------------|--------------|--------------|
| PC1 (plus)     | 0.57     | 6.95         | 0.45       | 0.87       | 0.26     | 5.67         | 0.84         | 0.07         |
| PC1 (minus)    | 0.04     | 0.10         | 0.80       | 0.65       | 0.02     | 1.72         | 0.98         | 0.20         |
| PC2 (plus)     | 0.06     | 2.65         | 0.31       | 0.64       | 0.10     | 2.98         | 0.84         | 0.12         |
| PC2 (minus)    | 0.54     | 4.41         | 0.94       | 0.89       | 0.18     | 4.41         | 0.98         | 0.15         |
| PC3 (plus)     | 0.76     | 0.49         | 0.57       | 0.74       | 0.29     | 1.87         | 0.85         | 0.19         |
| PC3 (minus)    | -0.16    | 6.56         | 0.68       | 0.78       | -0.01    | 5.52         | 0.97         | 0.08         |
| PC4 (plus)     | 0.15     | 1.68         | 0.58       | 1.19       | 0.10     | 3.06         | 0.88         | 0.14         |
| PC4 (minus)    | 0.45     | 5.38         | 0.67       | 0.33       | 0.18     | 4.33         | 0.94         | 0.13         |
| Parameter mean | 0.30     | 3.53         | 0.62       | 0.76       | 0.14     | 3.69         | 0.91         | 0.13         |

1640 This analysis revealed that PC1, capturing the largest proportion of pa-  
1641 rameter variance, reflected a broad measure of behavioral quality: Low values  
1642 of PC1 led to low performance and lacked differentiation between different  
1643 outcome histories, while high values led to high performance and efficient  
1644 responses that were in tune with outcome histories (suppl. Fig. 19A; suppl.  
1645 Table 14). PC1 factor loadings revealed that low behavioral quality was re-  
1646 lated to larger-than-average values of  $\alpha_-$  (RL), which likely led to premature  
1647 switching due to the over-sensitivity to recent negative outcomes. Low behav-  
1648 ioral quality was also due to larger-than-average values of  $p_{reward}$  and  $p_{switch}$   
1649 (BI), which created overly deterministic and overly volatile mental models  
1650 of the task; whereas an overly deterministic task model leads to pre-mature  
1651 switching after negative outcomes (because negative outcomes only arise in  
1652 deterministic tasks when contingencies have switched), and an overly volatile  
1653 task model leads to a reduced reliance on past outcomes (because frequent  
1654 task switches mean that past information is soon outdated; suppl. Fig. 19A,  
1655 center). High behavioral quality, on the other hand, was caused by larger-  
1656 than-average values of  $\alpha_+$  (RL), which underlies the quick learning from  
1657 positive outcomes, and therefore reliable staying behavior after (diagnostic!)  
1658 outcomes. High behavioral quality was also caused by larger-than-average  
1659 values of  $p$  (RL and BI), which increased choice persistence, facilitating rep-  
1660 etition of non-rewarded actions; and of larger-than-average values of  $\beta$  (RL  
1661 and BI), which reduced decision noise, allowing for a more direct translation  
1662 of beliefs (BI) or action values (RL) into choices.

1663 PC2 represented integration time scales: Low values of PC2 (short time  
1664 scales) led to win-stay behavior—defined as immediate switching after neg-

1665 ative outcomes and consistent staying after positive outcomes—, which re-  
1666 sulted in poor performance on asymptotic trials (suppl. Fig. 19B, left).  
1667 High values of PC2, on the other hand, led to increasingly slow behavioral  
1668 switches, resulting in poor performance on switch trials (suppl. Fig. 19B,  
1669 right). In order to achieve high performance on both asymptotic and switch  
1670 trials, participants needed to find the appropriate balance between both ends  
1671 on this spectrum. PC3 captured responsiveness to task outcomes: Low val-  
1672 ues of PC3 led to a lack of differentiation between outcome histories and  
1673 slow behavioral switching (suppl. Fig. 19C, right), whereas high values led  
1674 to extremely consistent win-stay-lose-shift behavior (suppl. Fig. 19C, left).  
1675 PC4 uniquely captured RL parameter  $\alpha_+$ , i.e., the tension between slow  
1676 versus fast updates when integrating positive outcomes (suppl. Fig. 19D).  
1677 Suppl. Figures 19B, C, and D (center) show which model parameters drove  
1678 the behavior of PC2-4.

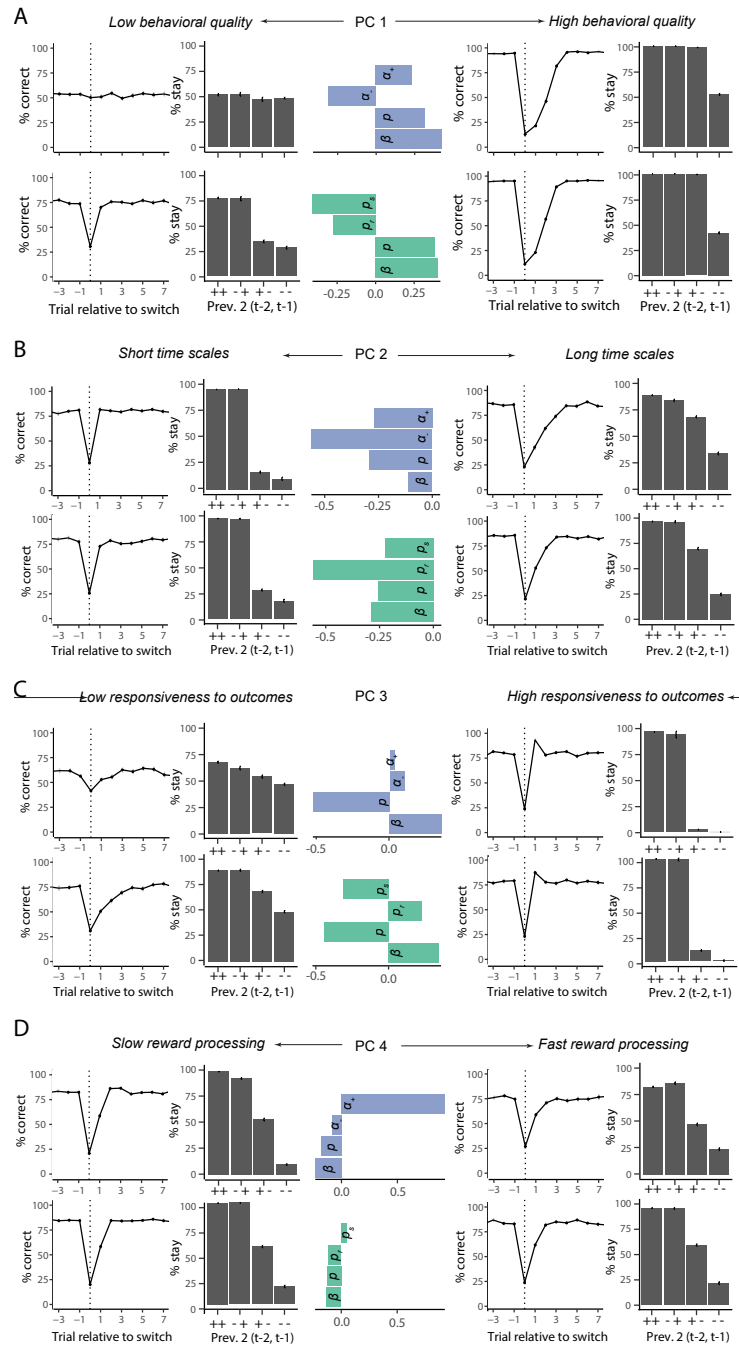

Figure 19: Determining the role of each PC for behavior. The figure shows simulated behavior based on low (left) and high (right) values of each PC. Parts A-D) show the results for PCs 1-4.

1679 To address the main question of our study, we also assessed age differences  
1680 in PCs. Table 15 shows the results of this analysis.

Table 15: Results of t-tests on PC2 and PC4. df: Welch-adjusted degrees of freedom.

| Comparison            | $t$  | df    | $p$     | Sig. |
|-----------------------|------|-------|---------|------|
| PC2 (8-15 vs. 15-30)  | 3.44 | 266.2 | < 0.001 | ***  |
| PC4 (8-13 vs. 13-17)  | 2.28 | 176.8 | 0.047   | *    |
| PC4 (13-17 vs. 18-30) | 2.49 | 176.6 | 0.028   | *    |

#### 1681 6.4. Supplemental Discussion

##### 1682 6.4.1. Potential Effect of Recruitment on Results

1683 As explained in the Discussion, it is not impossible that recruitment dif-  
1684 ferences affected our results. However, speaking against this possibility, re-  
1685 cruitment processes were identical for children, adolescents, and community  
1686 adults, limiting the possibility that the observed age differences were due to  
1687 recruitment. The only age group that was recruited differently were college  
1688 students (see section 4.1); however, given the competitive nature of the col-  
1689 lege, we would expect college students to perform *better* than adolescents  
1690 and not worse. Furthermore, removing college students does not affect the  
1691 observed behavioral peak in adolescence. Lastly, the adolescent peak was spe-  
1692 cific to the current task, and did not arise in two structurally-similar learning  
1693 tasks participants performed in the same session (Master et al., 2020; Xia et  
1694 al., 2020; for side-by-side comparison, see Eckstein, Master, et al., 2021; Eck-  
1695 stein, Wilbrecht, et al., 2021). Both other tasks lacked the reversal aspect,  
1696 suggesting that adolescents are specifically adapted to reversal, in accordance  
1697 with the similarity in findings in van der Schaaf et al., 2011, a deterministic  
1698 reversal task.

##### 1699 6.4.2. Different Models at Different Ages?

1700 Previous studies have shown that participants of different ages some-  
1701 times are better fitted by different computational models, suggesting that  
1702 they might employ different cognitive mechanisms (e.g., Palminteri et al.,  
1703 2016). Could the same apply to our study? For example, previous stud-  
1704 ies have reported age-based increases in “model-based” (Decker et al., 2016)  
1705 and counterfactual learning (Palminteri et al., 2016), which might reflect an  
1706 improved mental task model. Accordingly, one might expect that in our

1707 study, children’s cognitive processes would resemble a simple incremental  
1708 RL model, whereas adolescents’ would resemble the mental-model-based—  
1709 and more optimal—BI model. Even though this is a justified question, it is  
1710 unlikely that different models applied to different age groups in our study,  
1711 given that both models captured the behavior of all age groups equally well in  
1712 model validation. Compared to previous studies that showed age differences  
1713 in model types, the greater flexibility of our models in terms of the number  
1714 of free parameters and augmentations might have allowed them to capture  
1715 more age differences, obliterating the need to change the model itself.
